# Supplementary material for: Stereo- and regio-selective synthesis of 3′-C-substituted-(N)-methanocarba adenosines as potential anticancer agents
Source: Royal Society of Chemistry journal article supplement (doi:10.1039/c6qo00358c), 2016-01-01
Supplement: c6qo00358c1.pdf [file c6qo00358c1.pdf]

## Supporting Information

# Stereo- and Regio-selective Synthesis of 3'-C-Substituted-(N)-methanocarbaadenosines as Potential Anticancer Agents

Siddhi D. Naik,<sup>a,b</sup> Girish Chandra,<sup>c</sup> Pramod K. Sahu,<sup>b</sup> Hong-Rae Kim,<sup>b</sup> Shuhao Qu,<sup>a,b</sup> Ji-seong Yoon,<sup>b</sup> and Lak Shin Jeong<sup>b\*</sup>

*<sup>a</sup>College of Pharmacy, Ewha Womans University, Seoul 03760, Korea. <sup>b</sup>Research Institute of Pharmaceutical Sciences, College of Pharmacy, Seoul National University, Seoul 08826, Korea; Tel: +82-2-880-7850. <sup>c</sup>Department of Chemistry, School of Chemical and Physical Sciences, Central University of Bihar, Gaya, Bihar, 823001, India.*

e-mail: [lakjeong@snu.ac.kr](mailto:lakjeong@snu.ac.kr)

SID-C18 (600MHz)

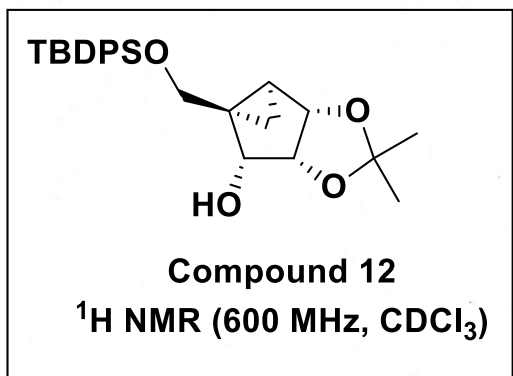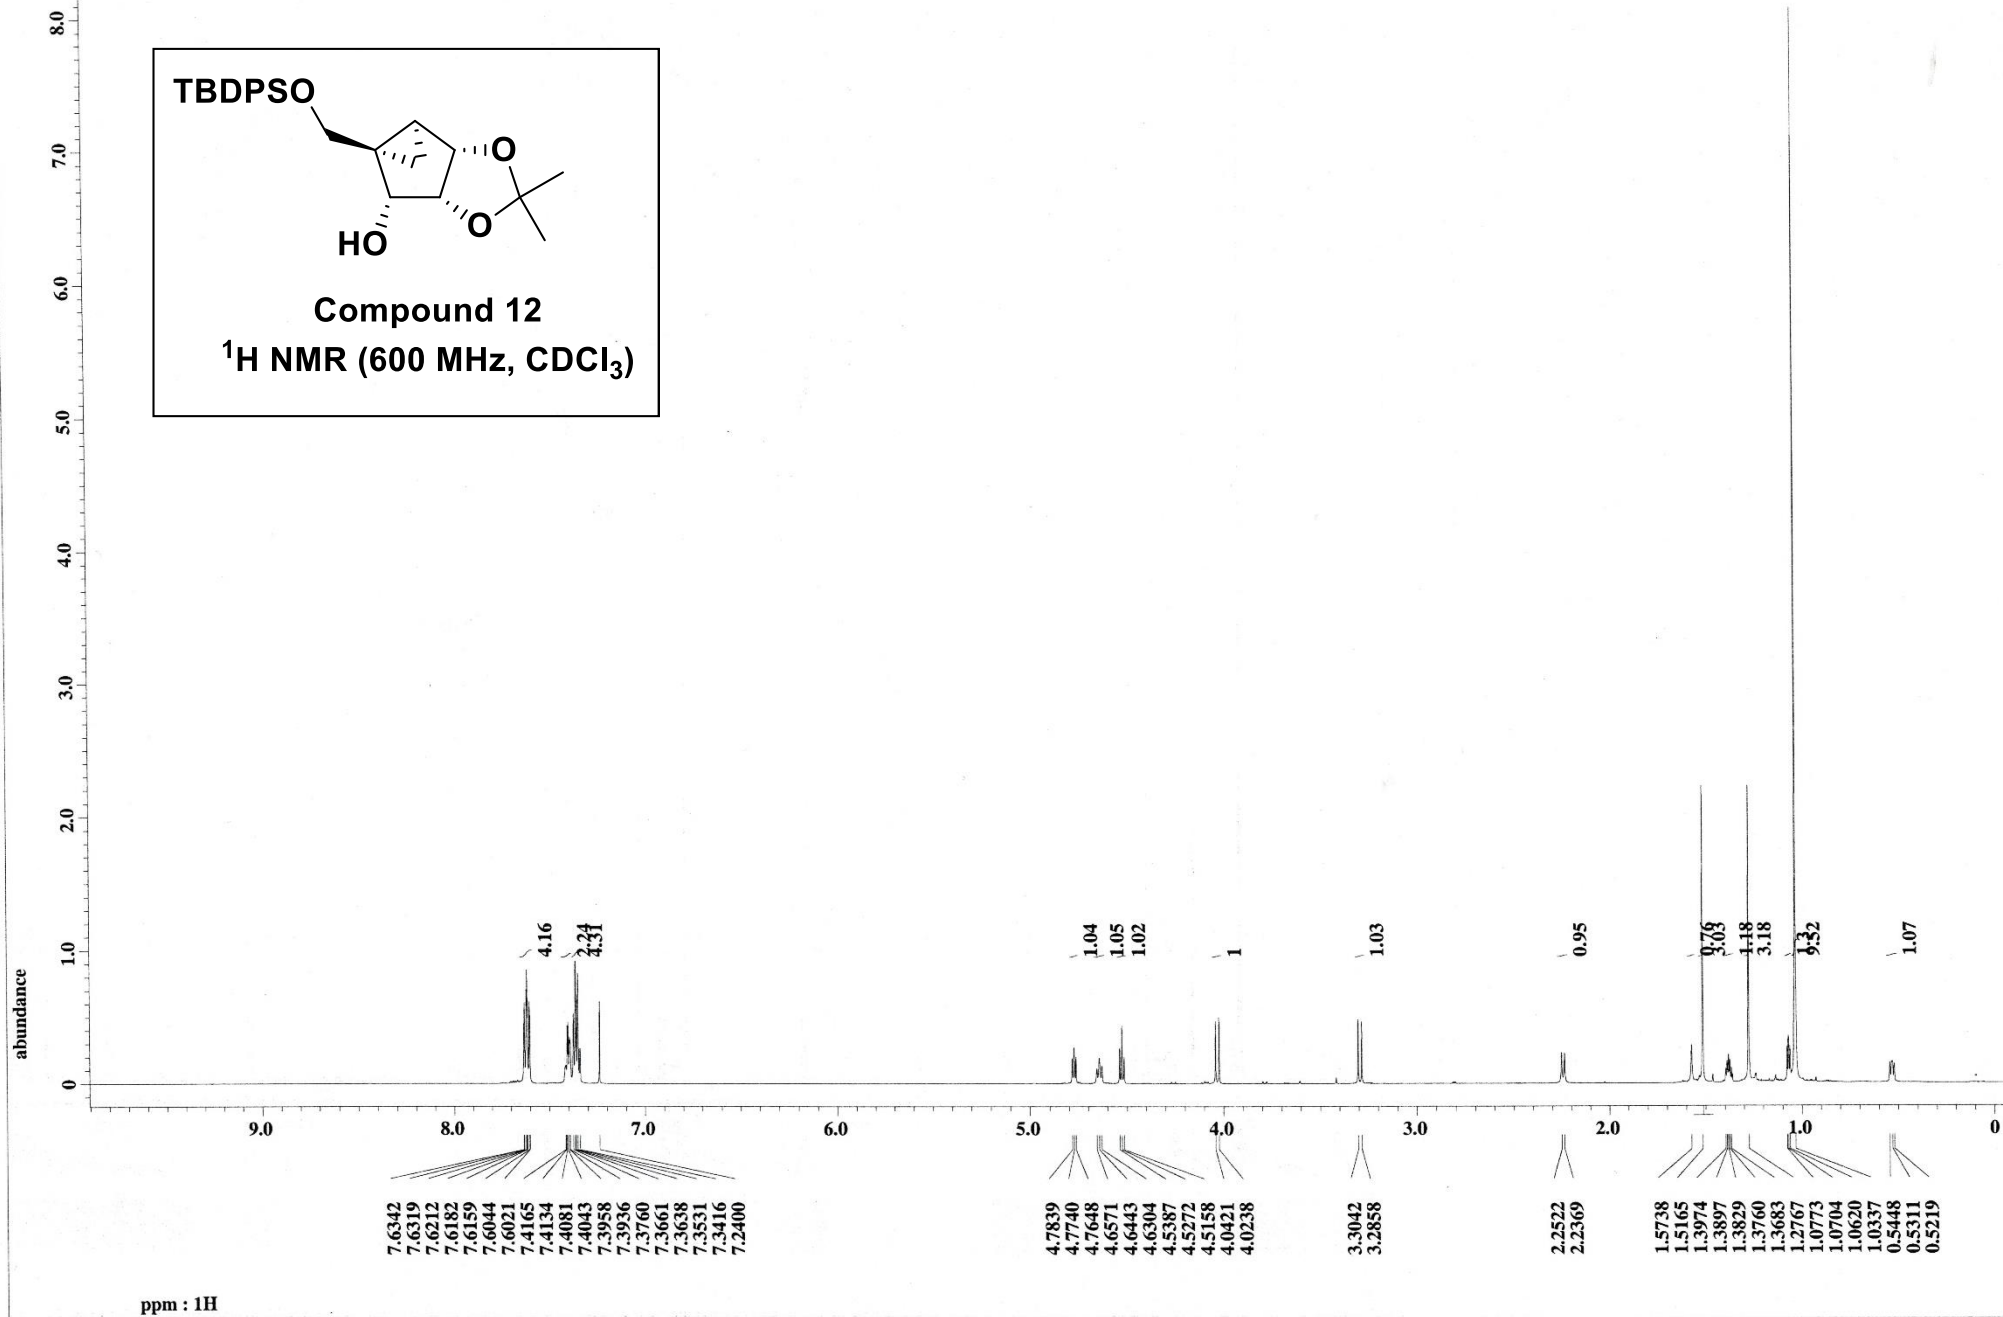

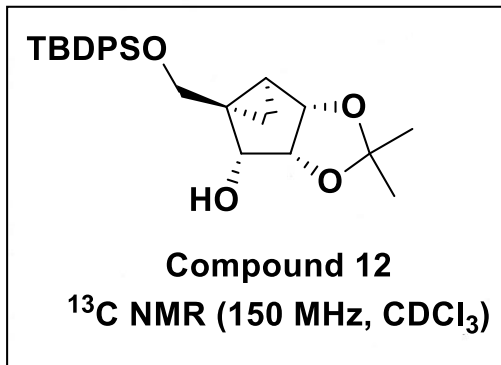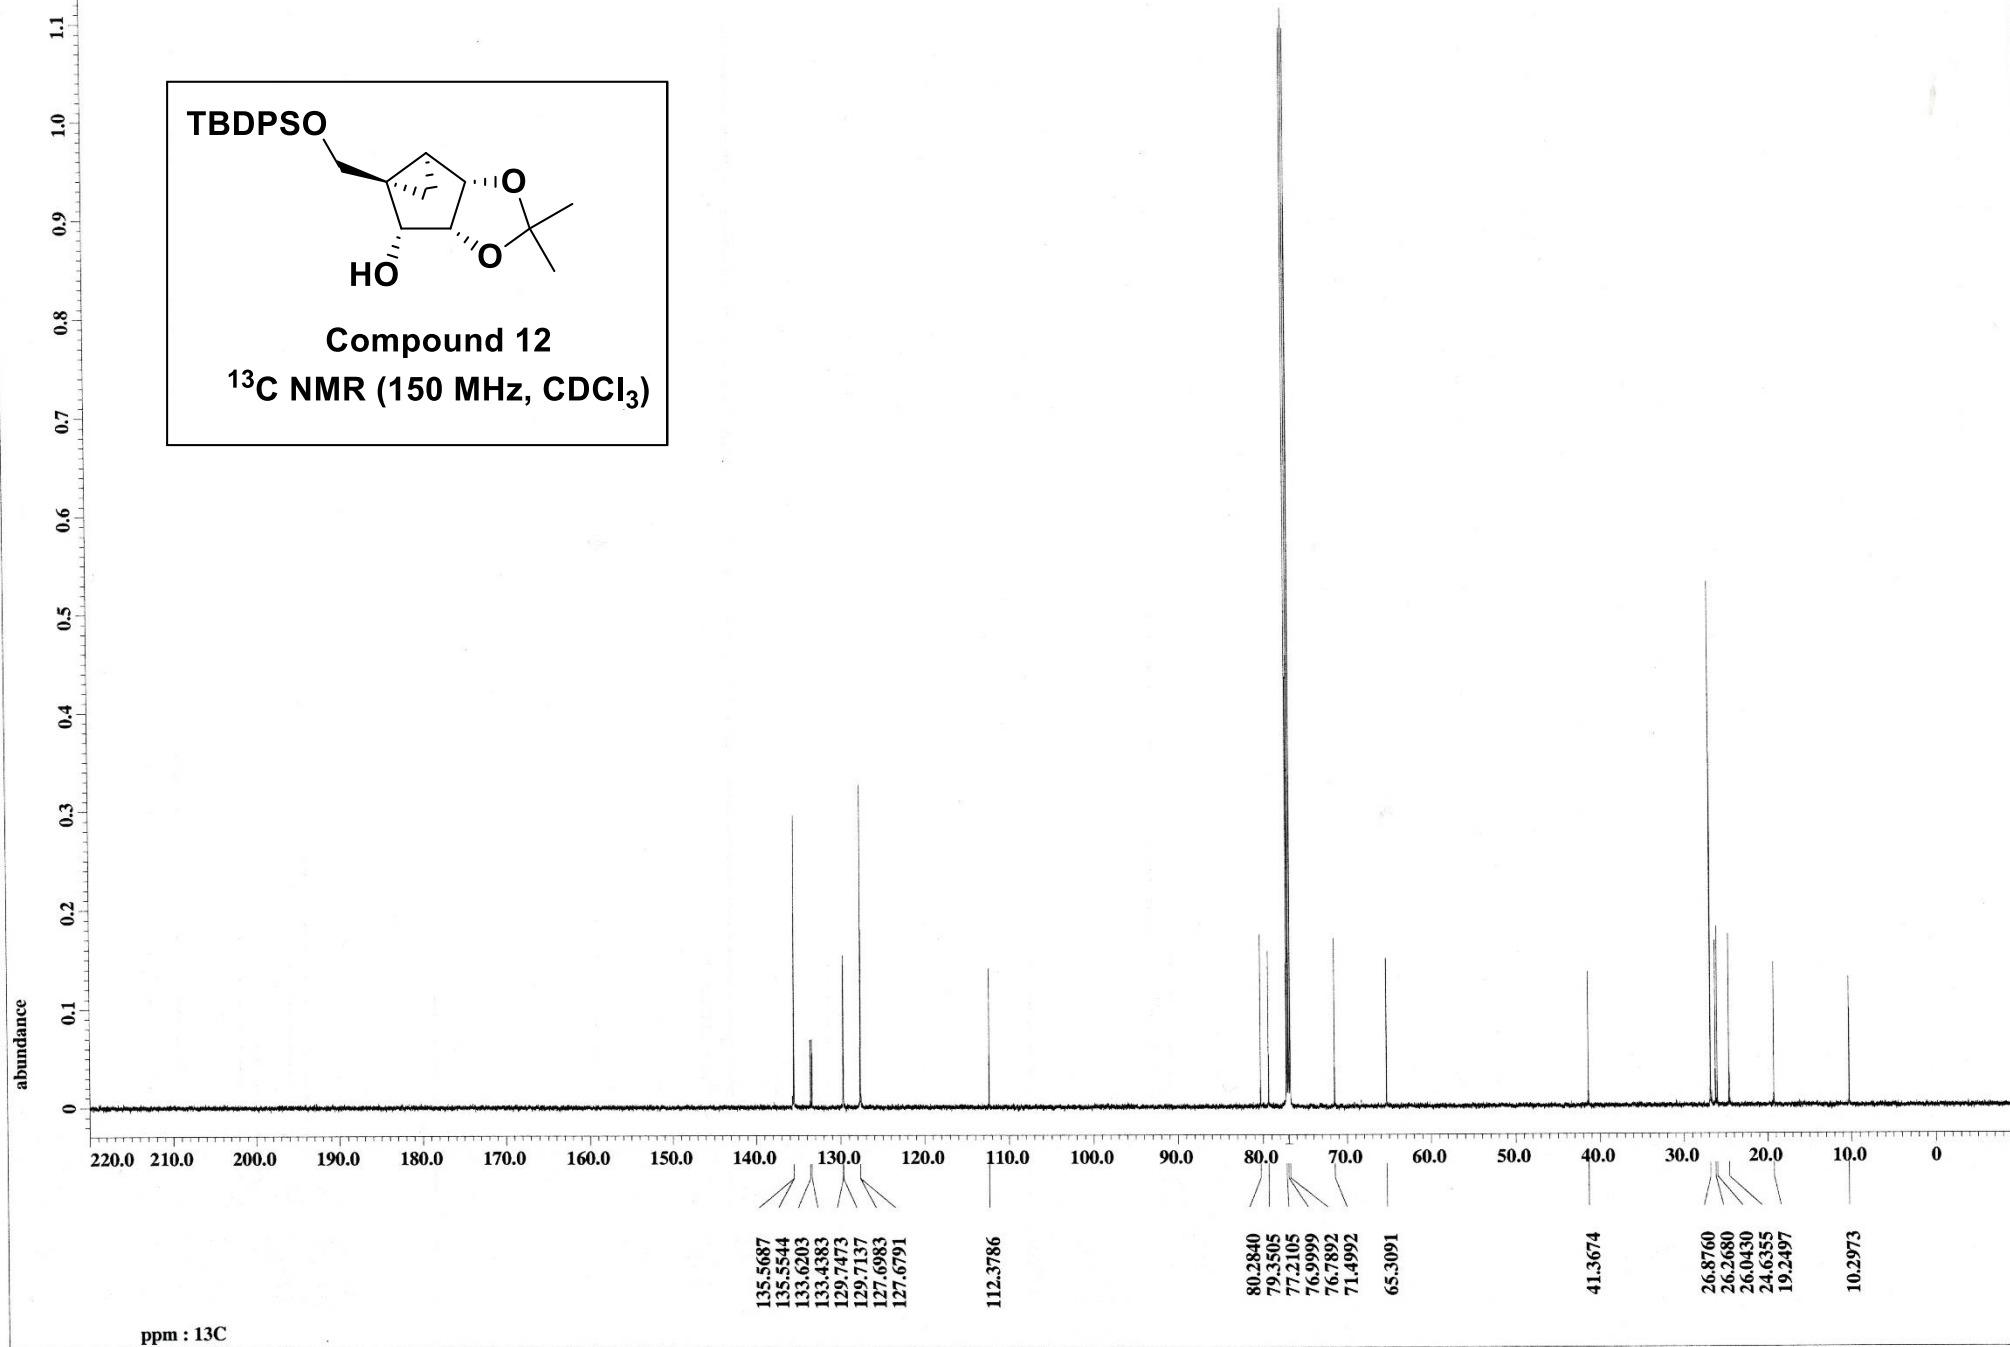

SID-C20 (600MHz)

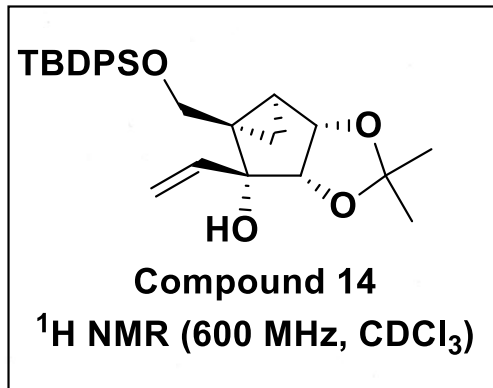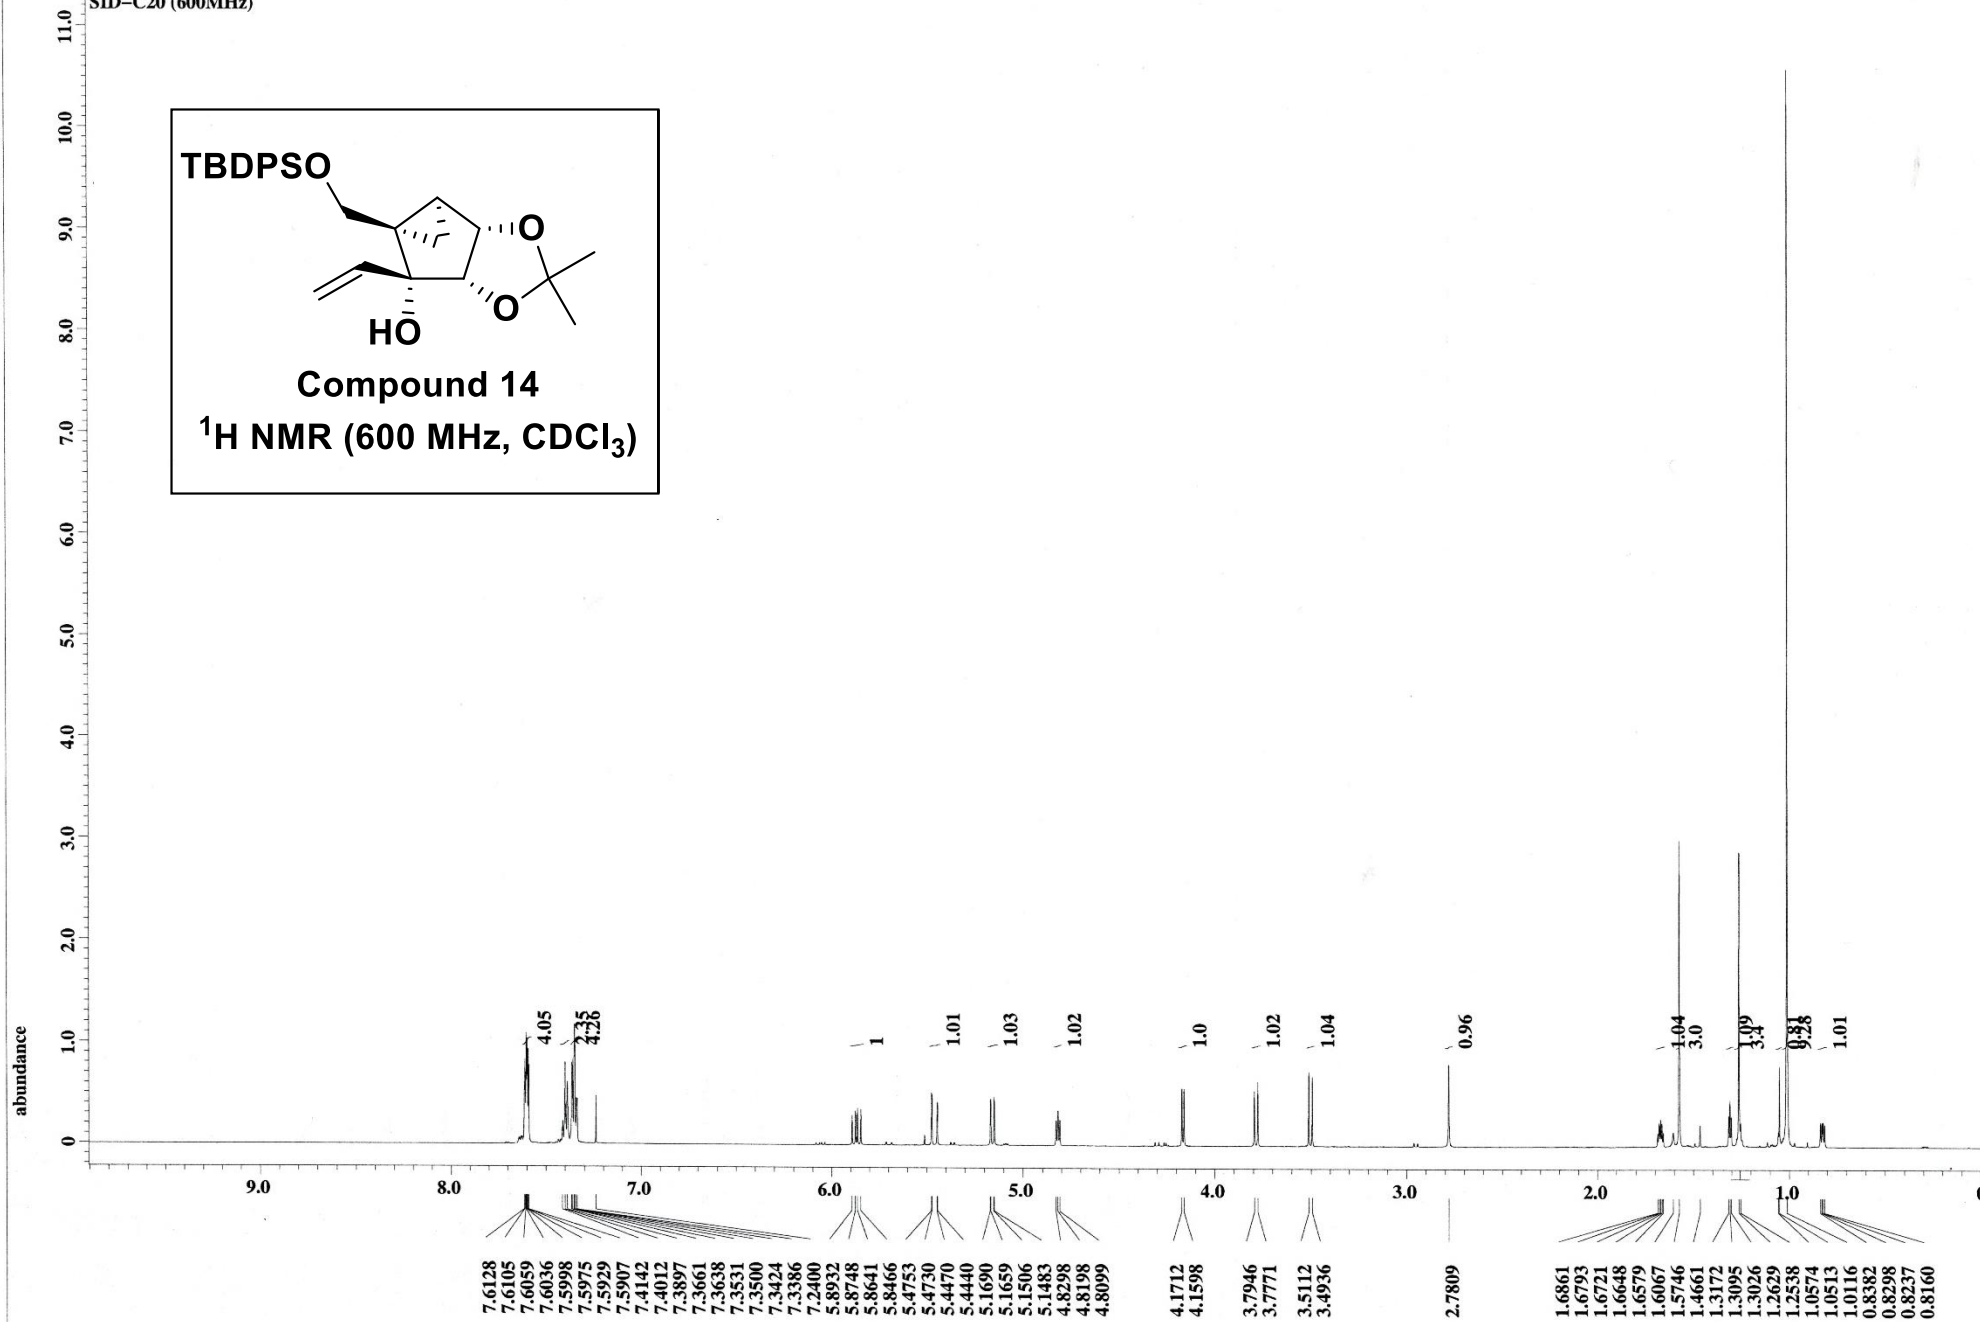

ppm :  $^1\text{H}$

SID-C20 (600MHz)

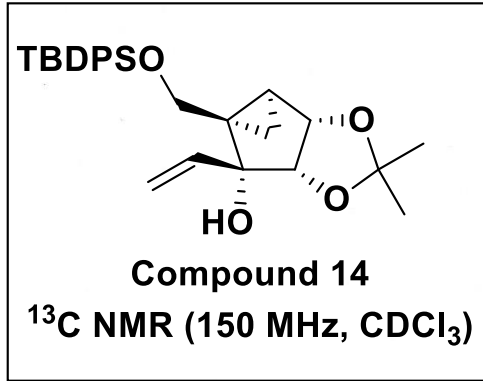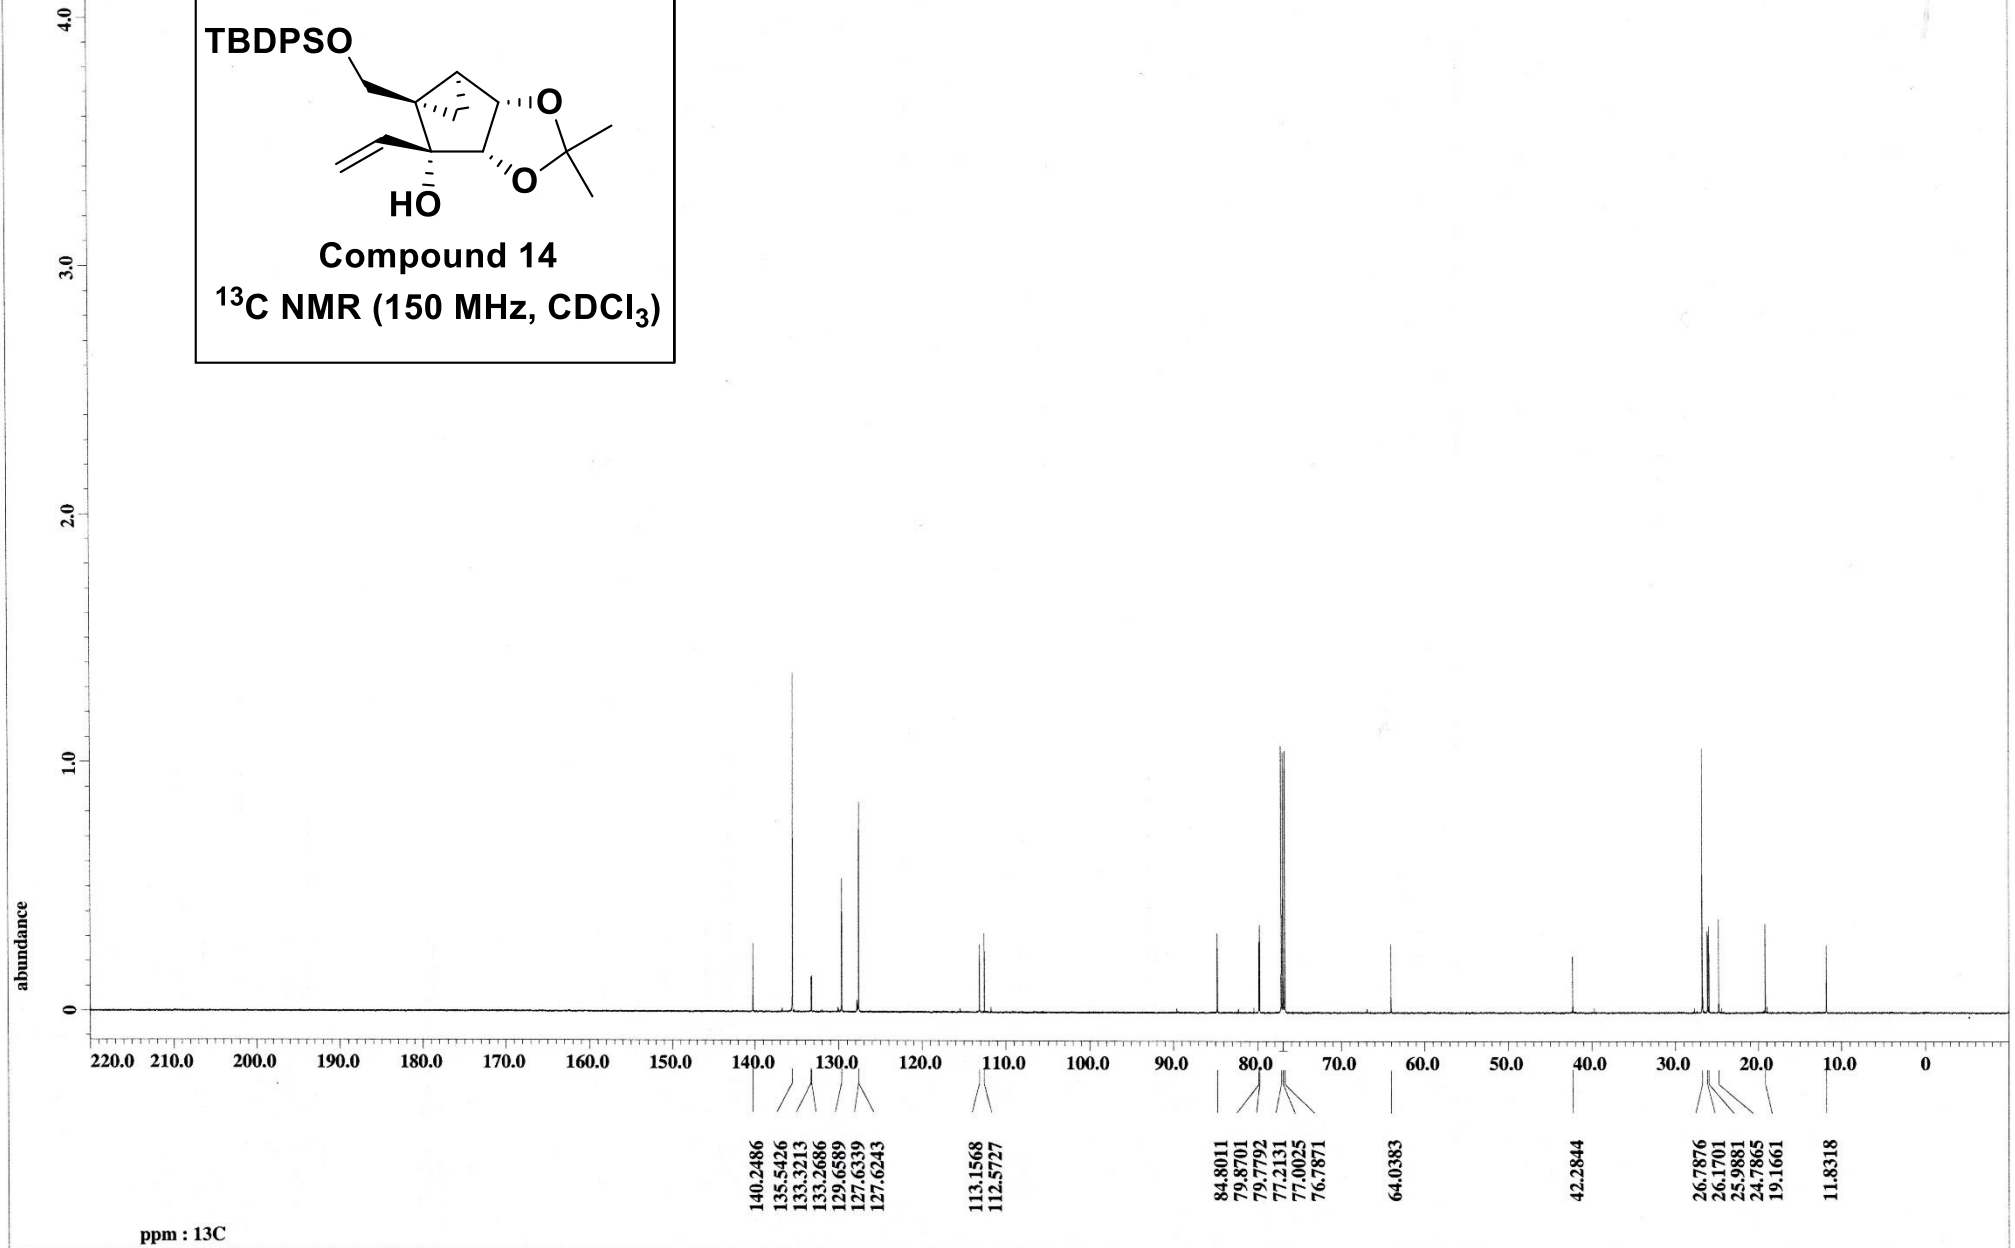

SID-C21 (600MHz)

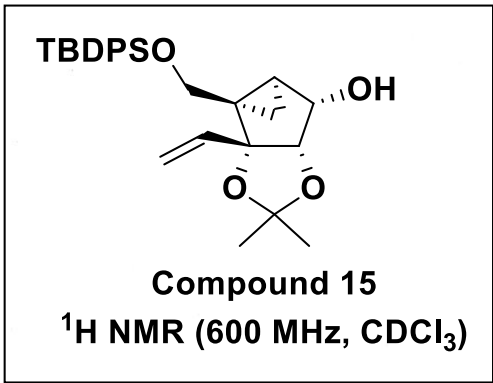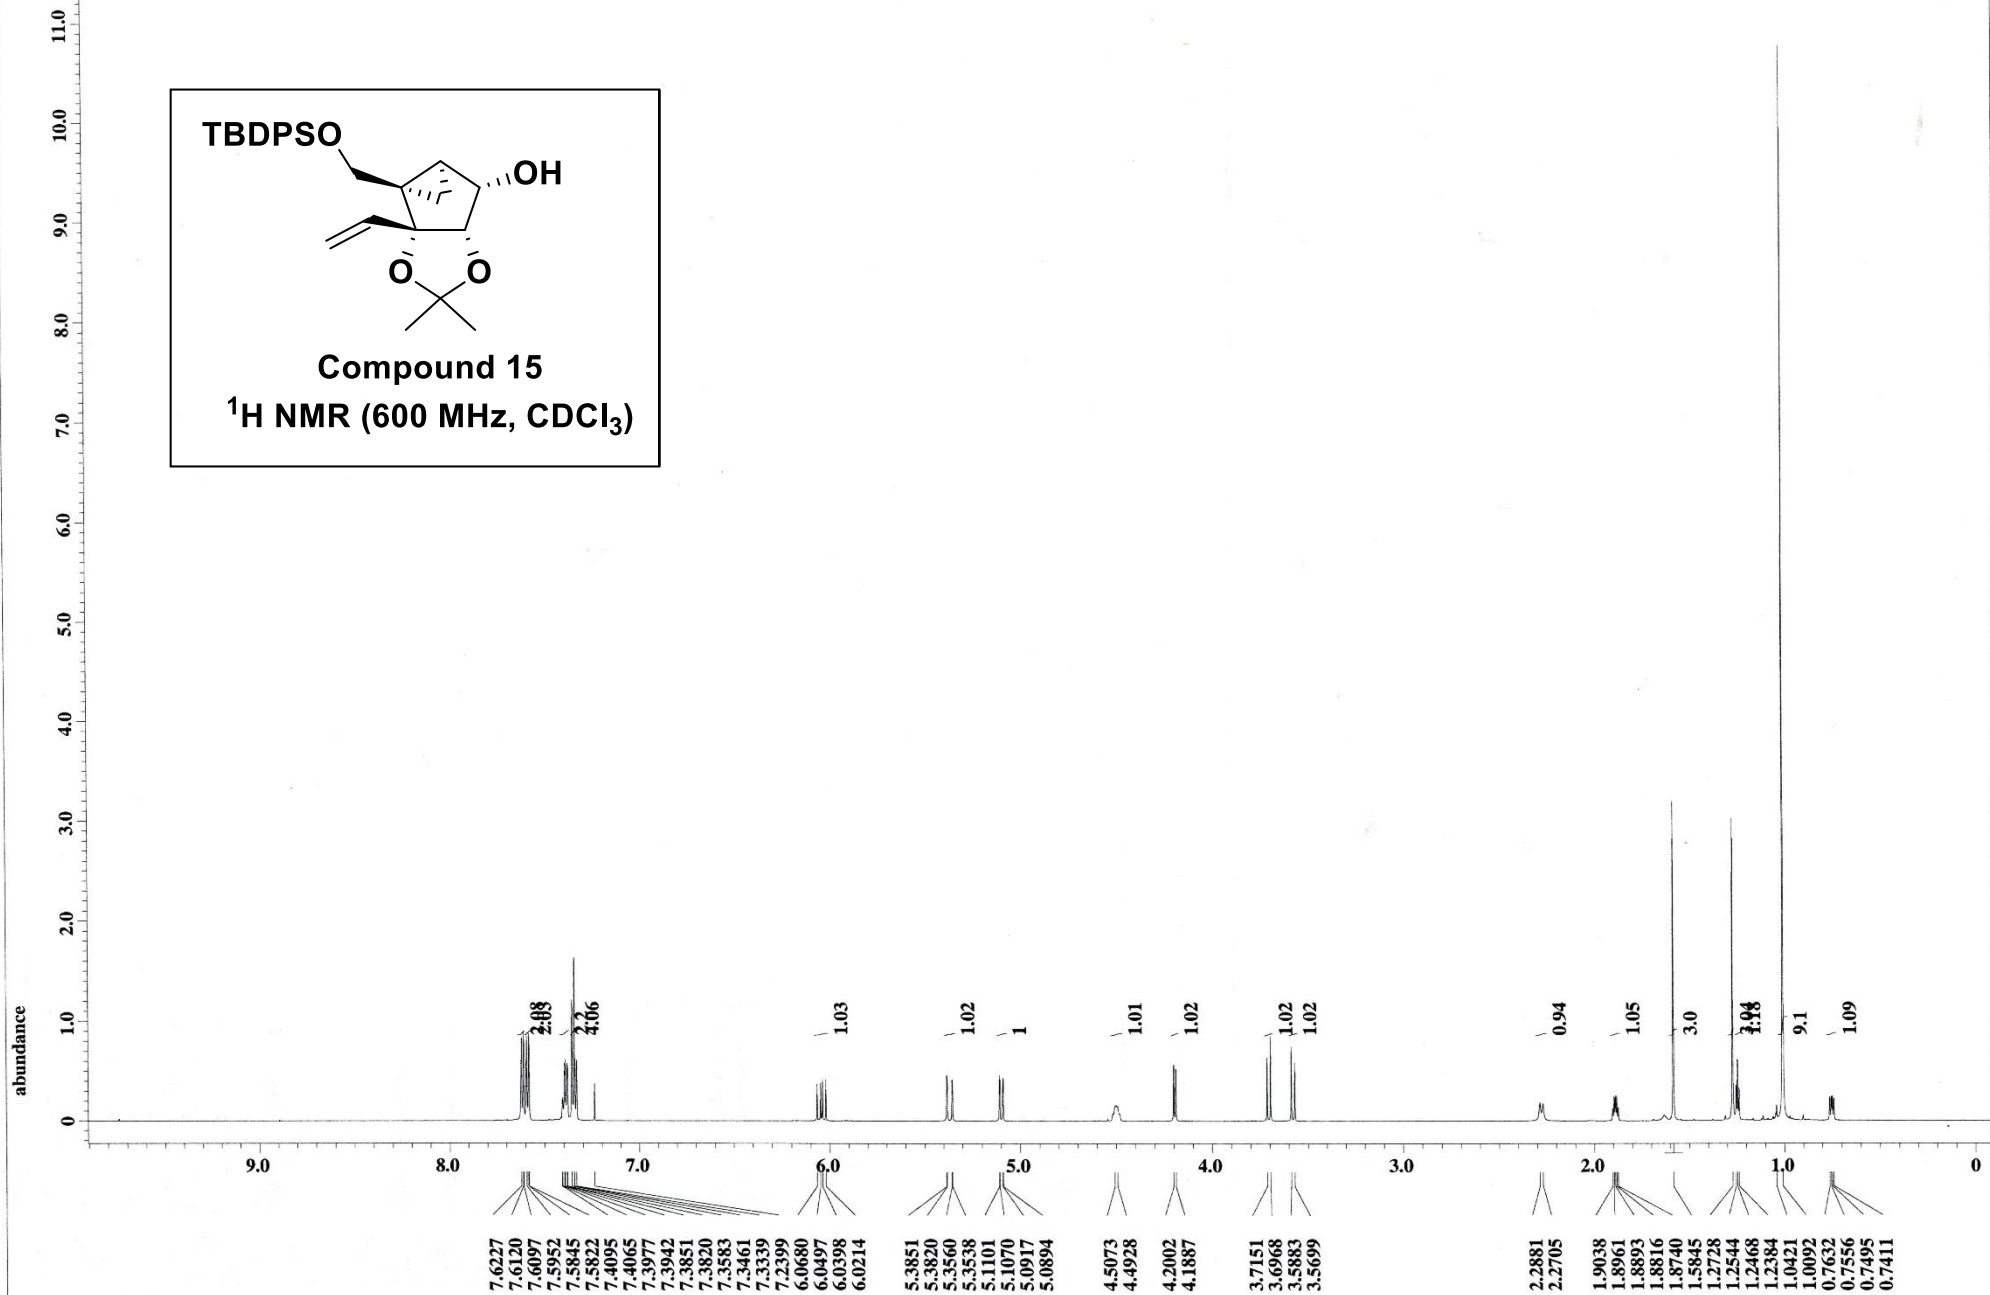

ppm : 1H

SID-C21 (600MHz)

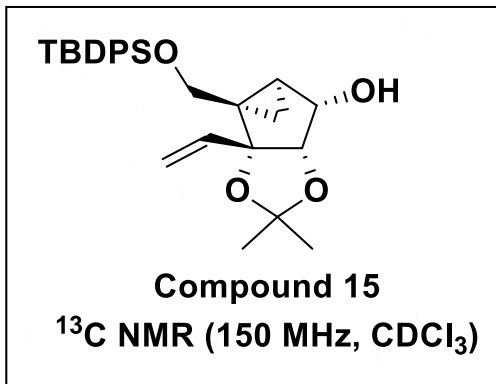

abundance

210.0 200.0 190.0 180.0 170.0 160.0 150.0 140.0 130.0 120.0 110.0 100.0 90.0 80.0 70.0 60.0 50.0 40.0 30.0 20.0 10.0 0 -10.0

ppm :  $^{13}\text{C}$

138.2018  
135.6070  
135.5352  
133.5963  
133.5532  
129.5701  
127.5881  
127.5498

113.1542  
112.9579

92.3195

84.4730

77.2105  
76.9999  
76.7892  
70.6422

63.3079

37.5279

31.3952  
26.7706  
26.4882  
25.2004

19.2497

11.8531

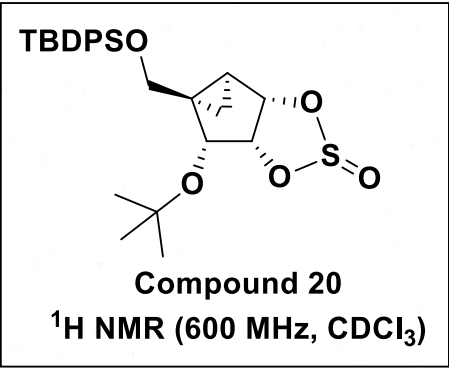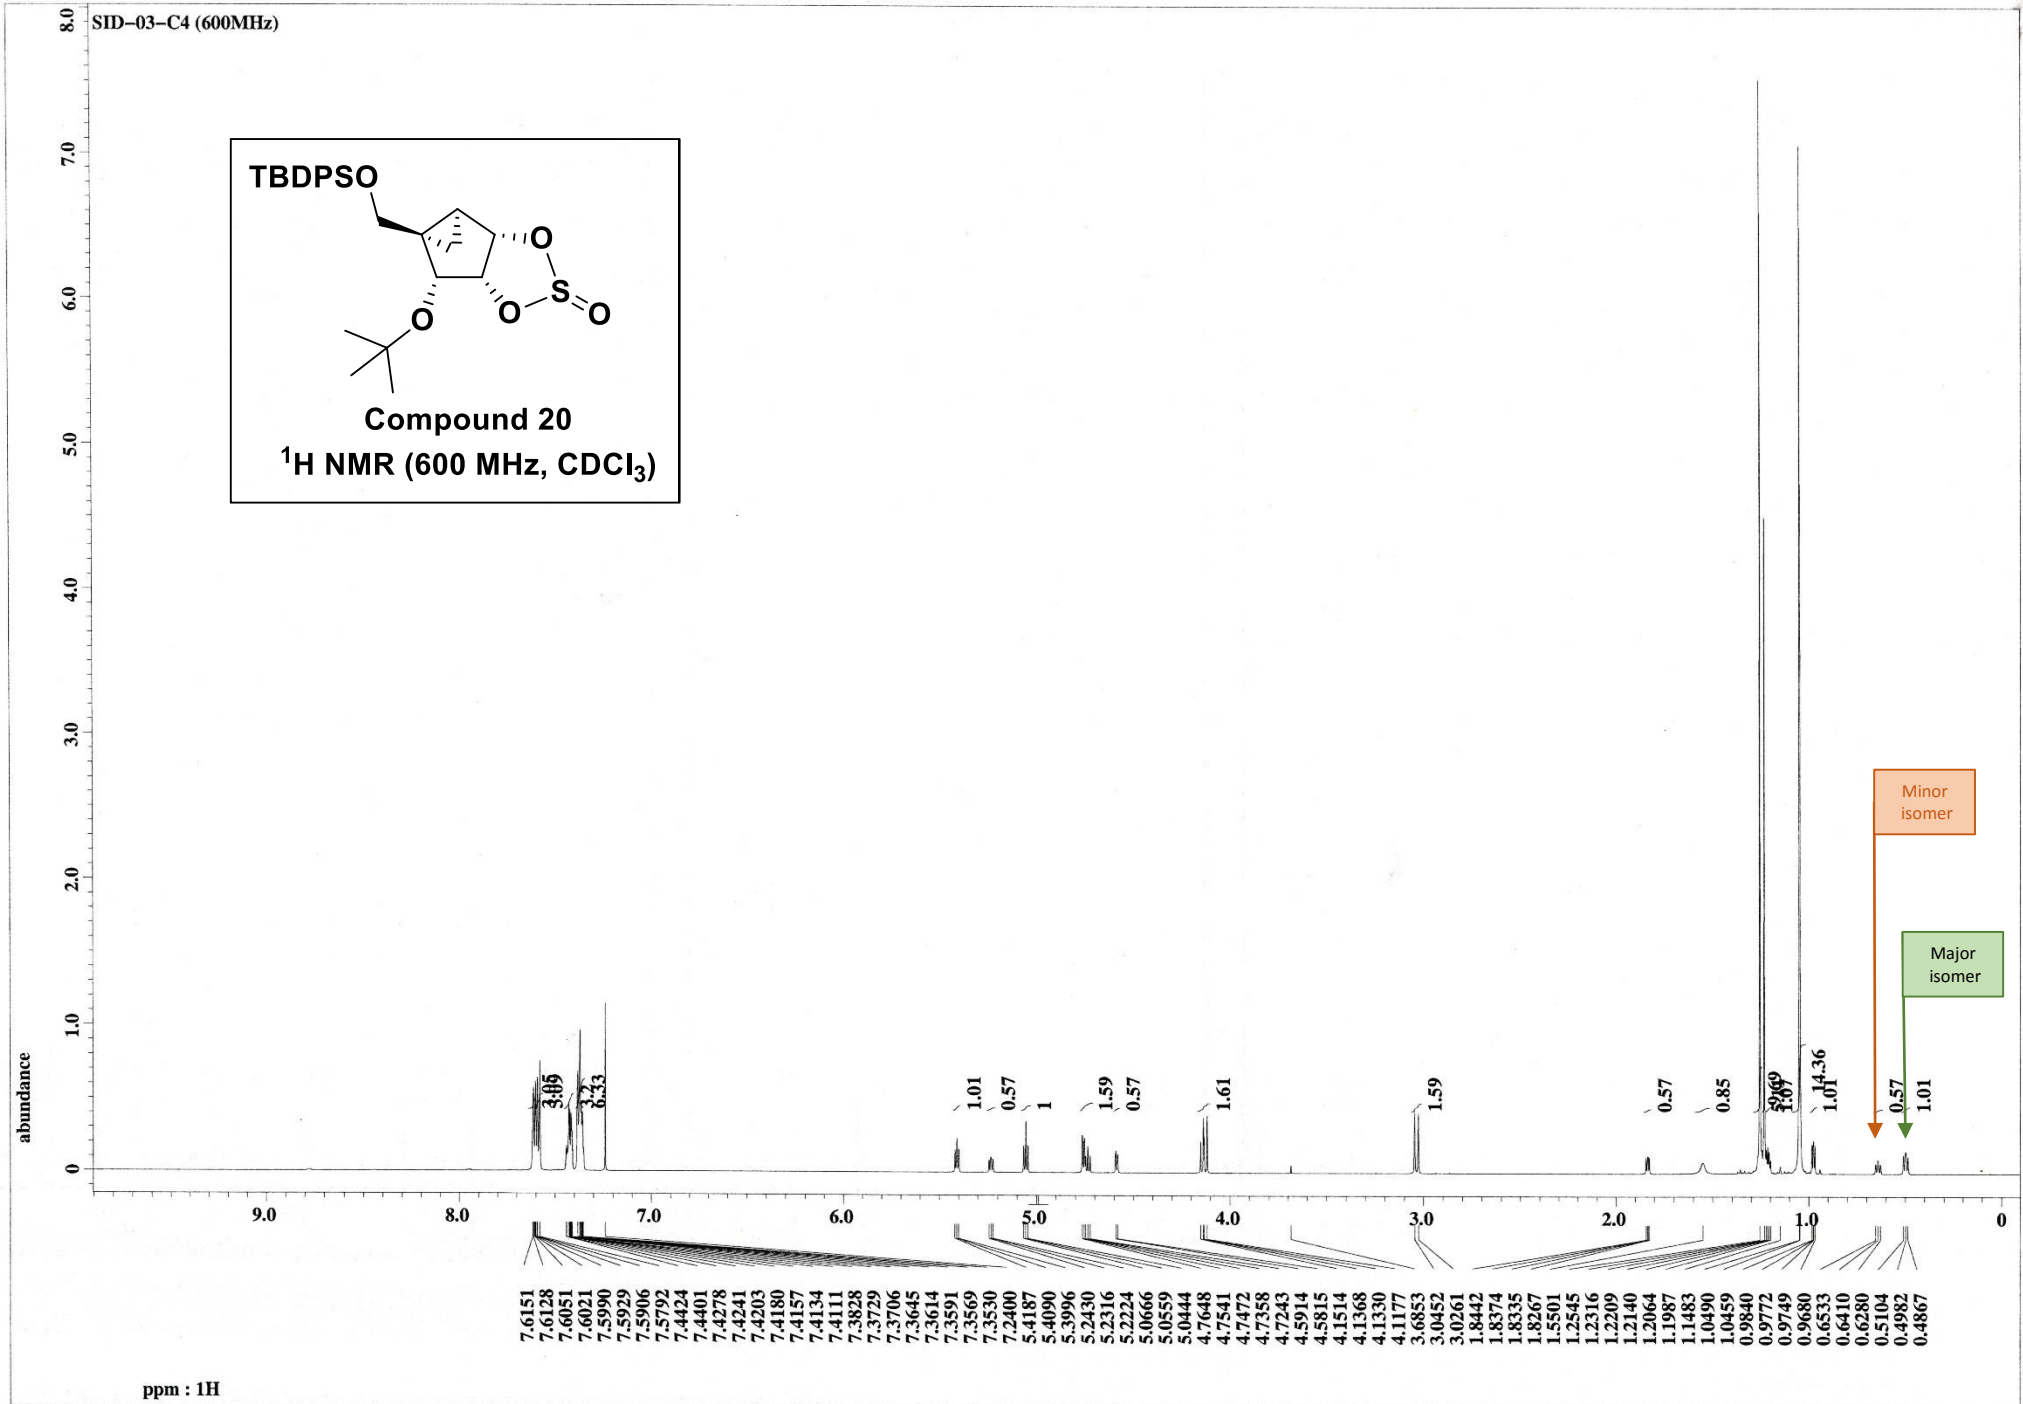



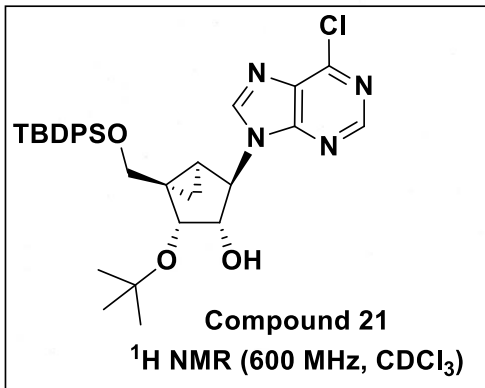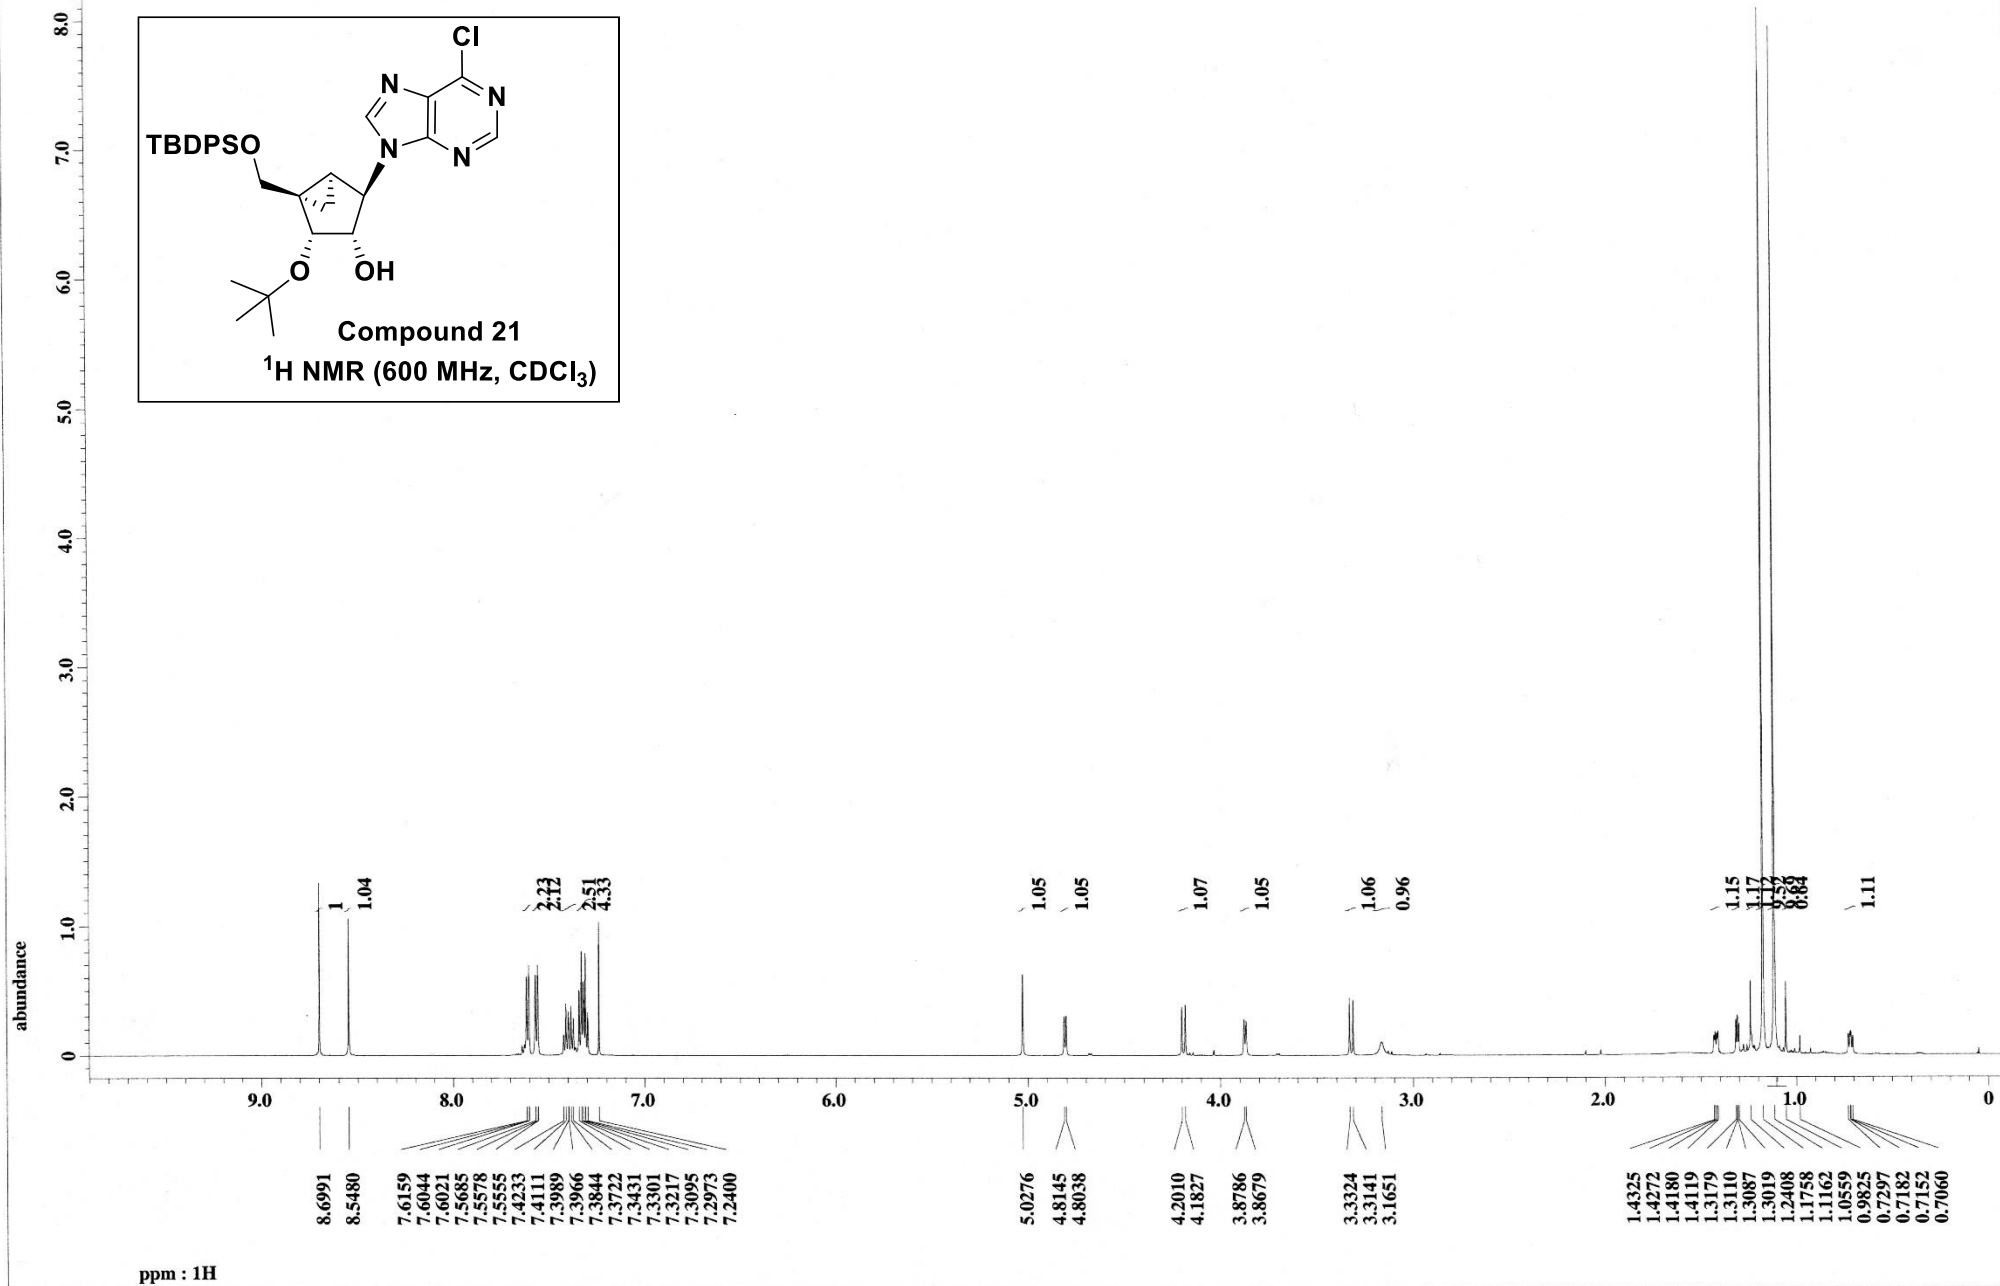

ppm : 1H

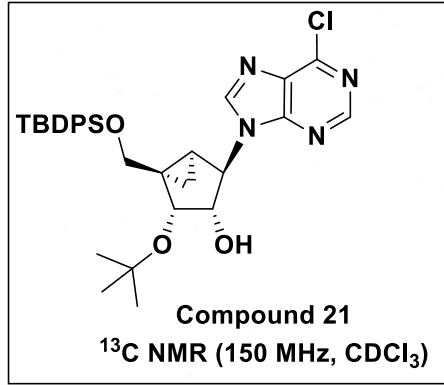

abundance

0.3  
0.2  
0.1  
0

210.0 200.0 190.0 180.0 170.0 160.0 150.0 140.0 130.0 120.0 110.0 100.0 90.0 80.0 70.0 60.0 50.0 40.0 30.0 20.0 10.0 0 -10.0

151.9657  
151.4056  
151.0657  
143.7889  
135.7461  
135.4684  
132.7923  
132.6630  
131.9018  
130.0012  
129.9294  
127.8277  
127.7559

77.2155  
77.0001  
76.7895  
75.1043  
71.1403  
64.4571  
61.7044

36.3456  
28.1161  
27.1156  
23.3239  
19.1446  
11.5278

ppm : <sup>13</sup>C

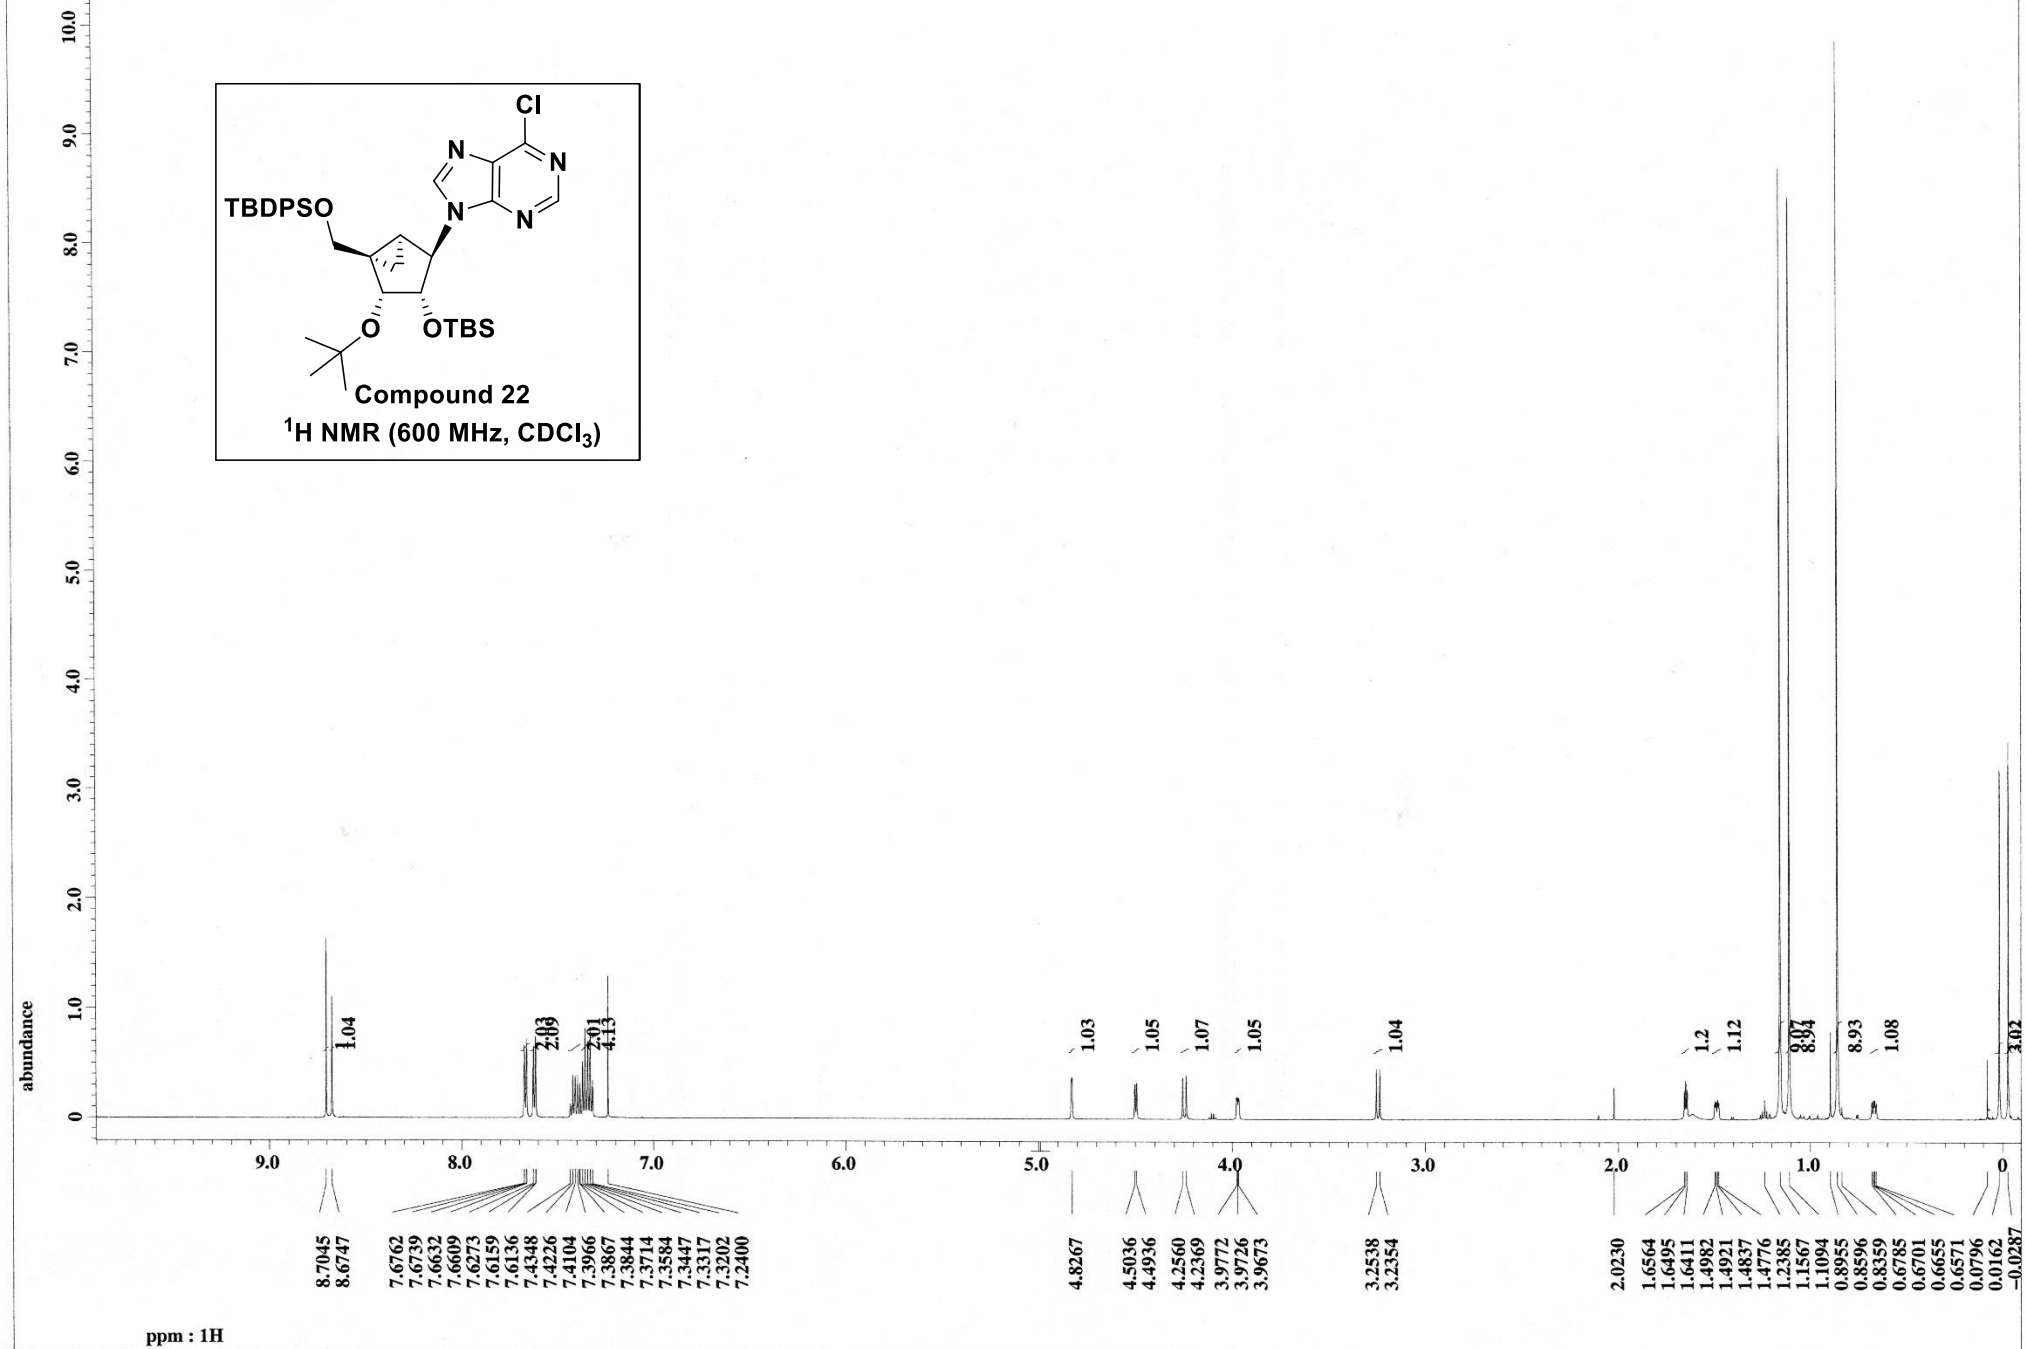

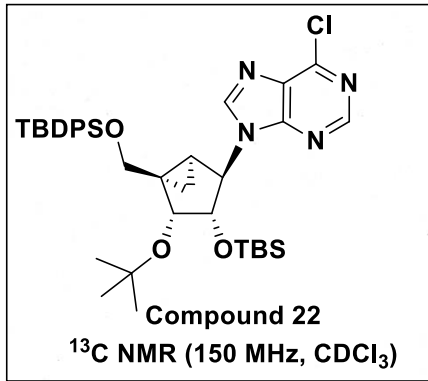

abundance

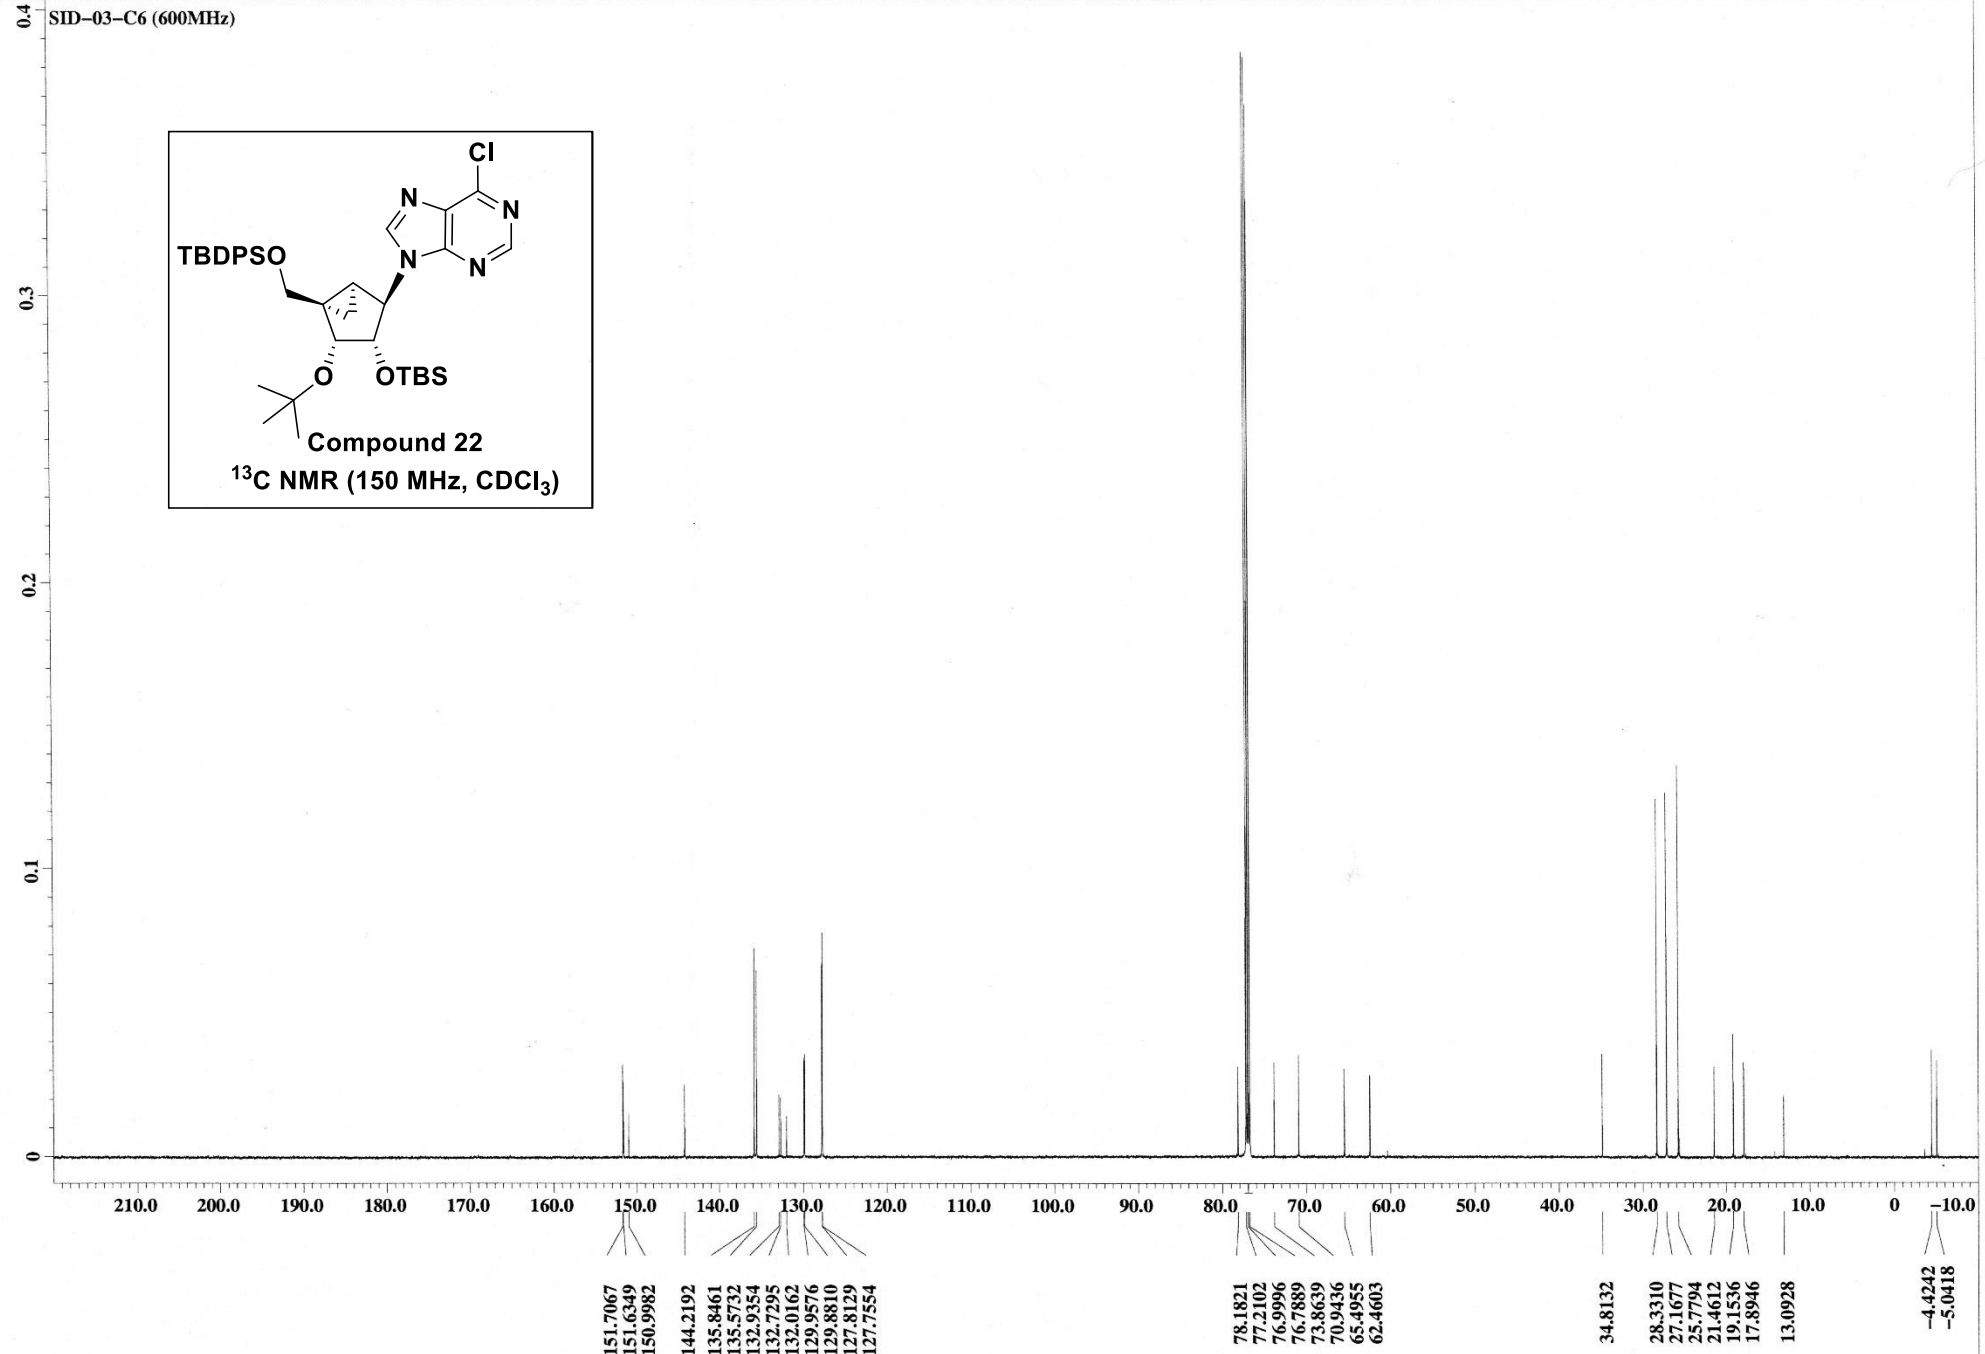

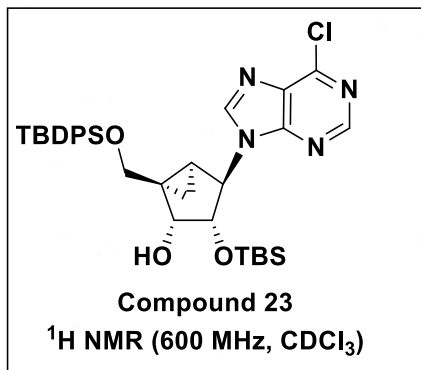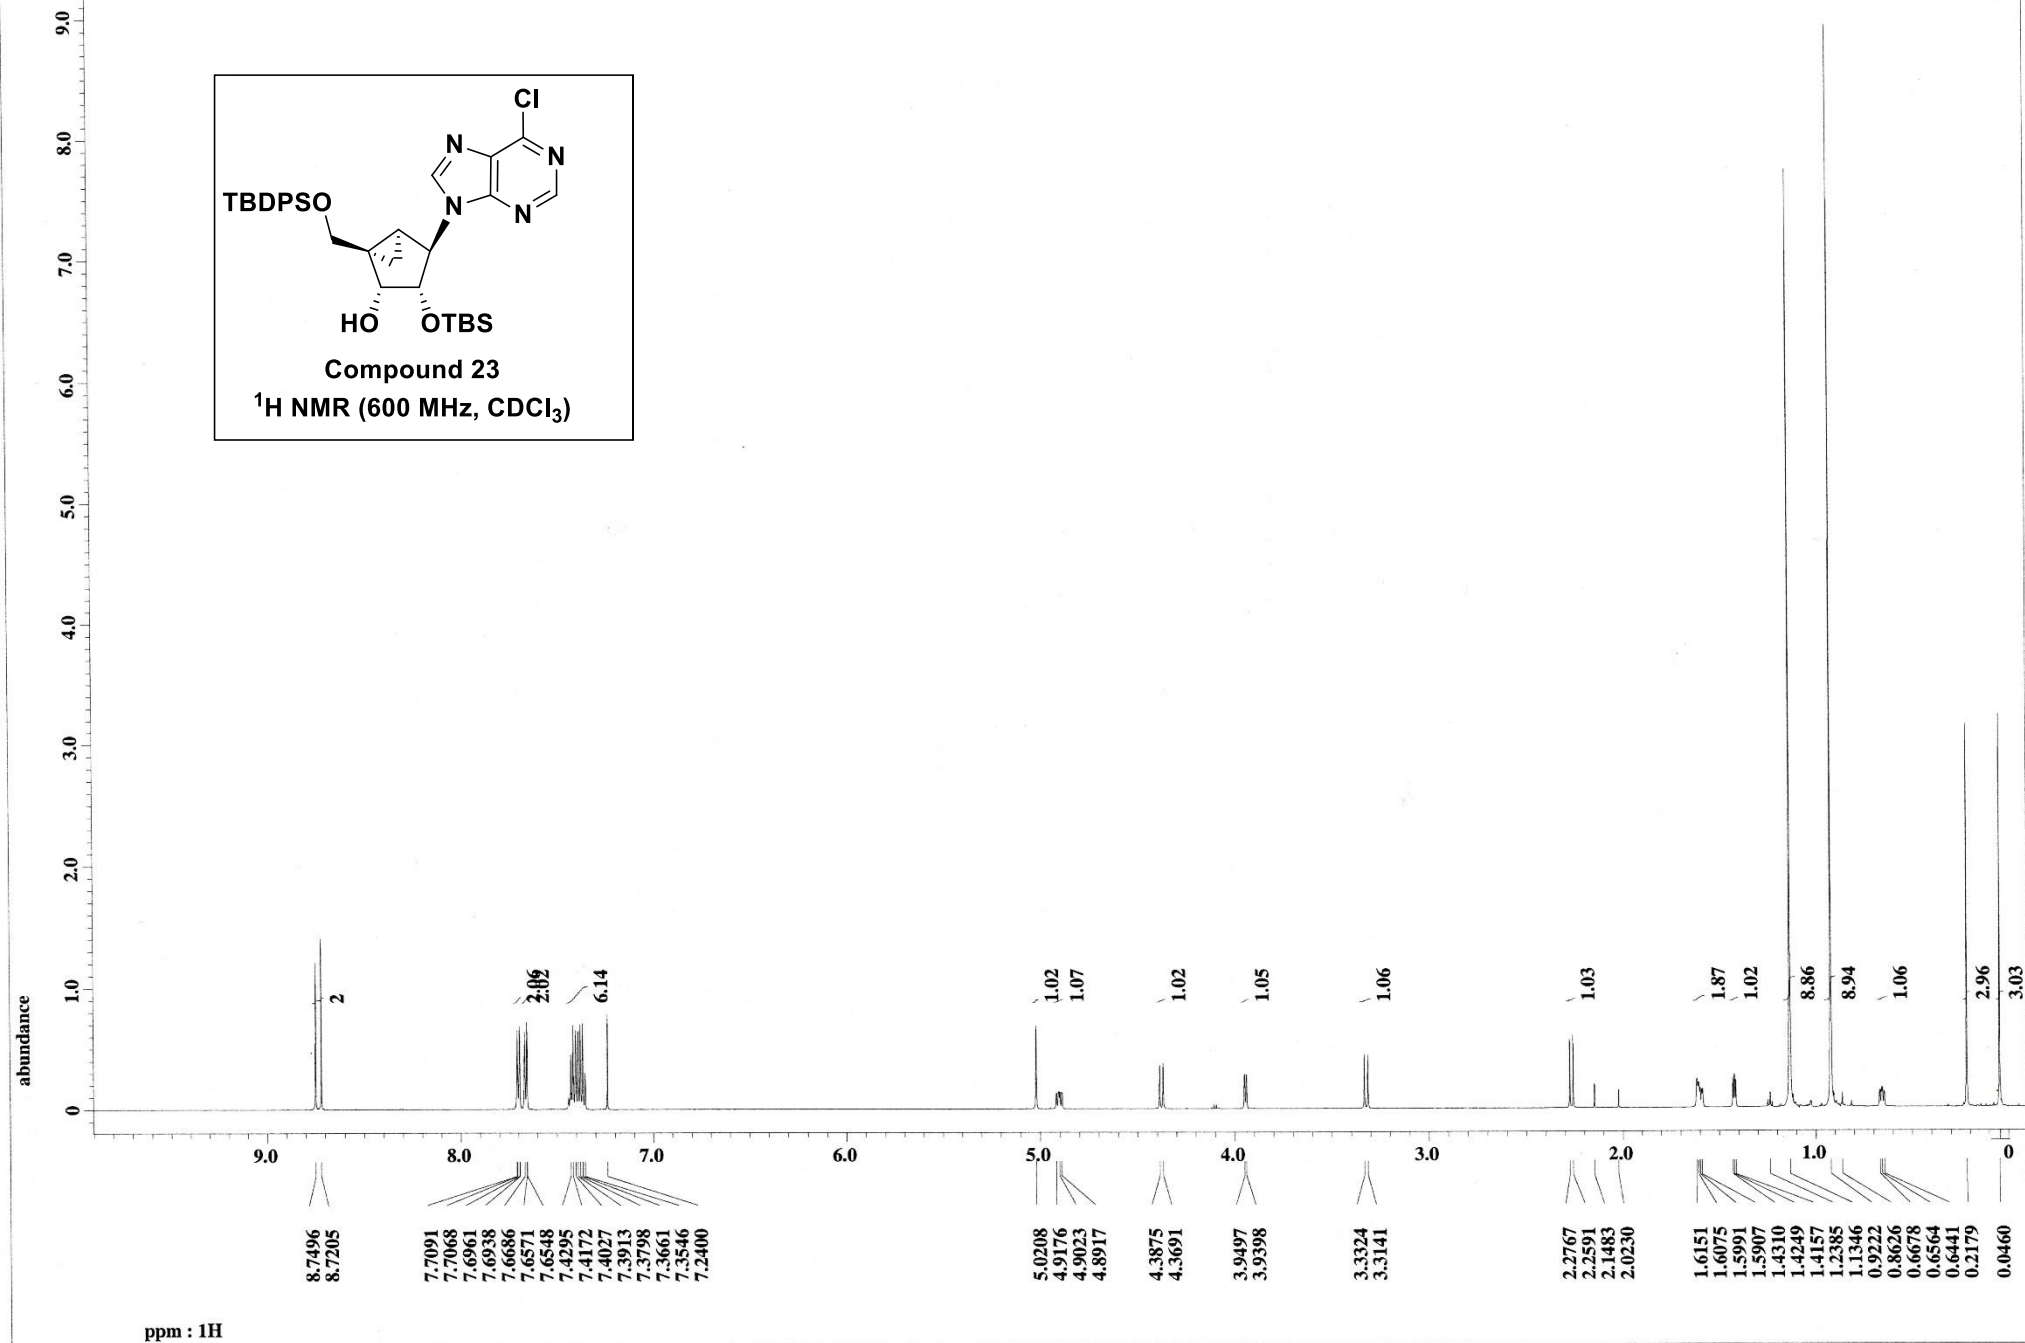

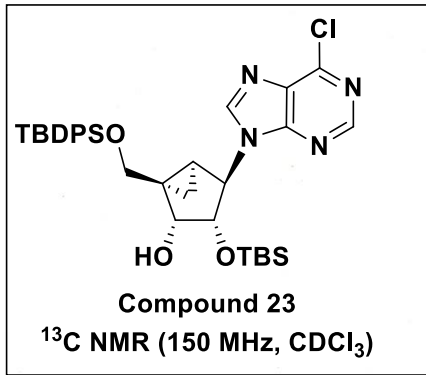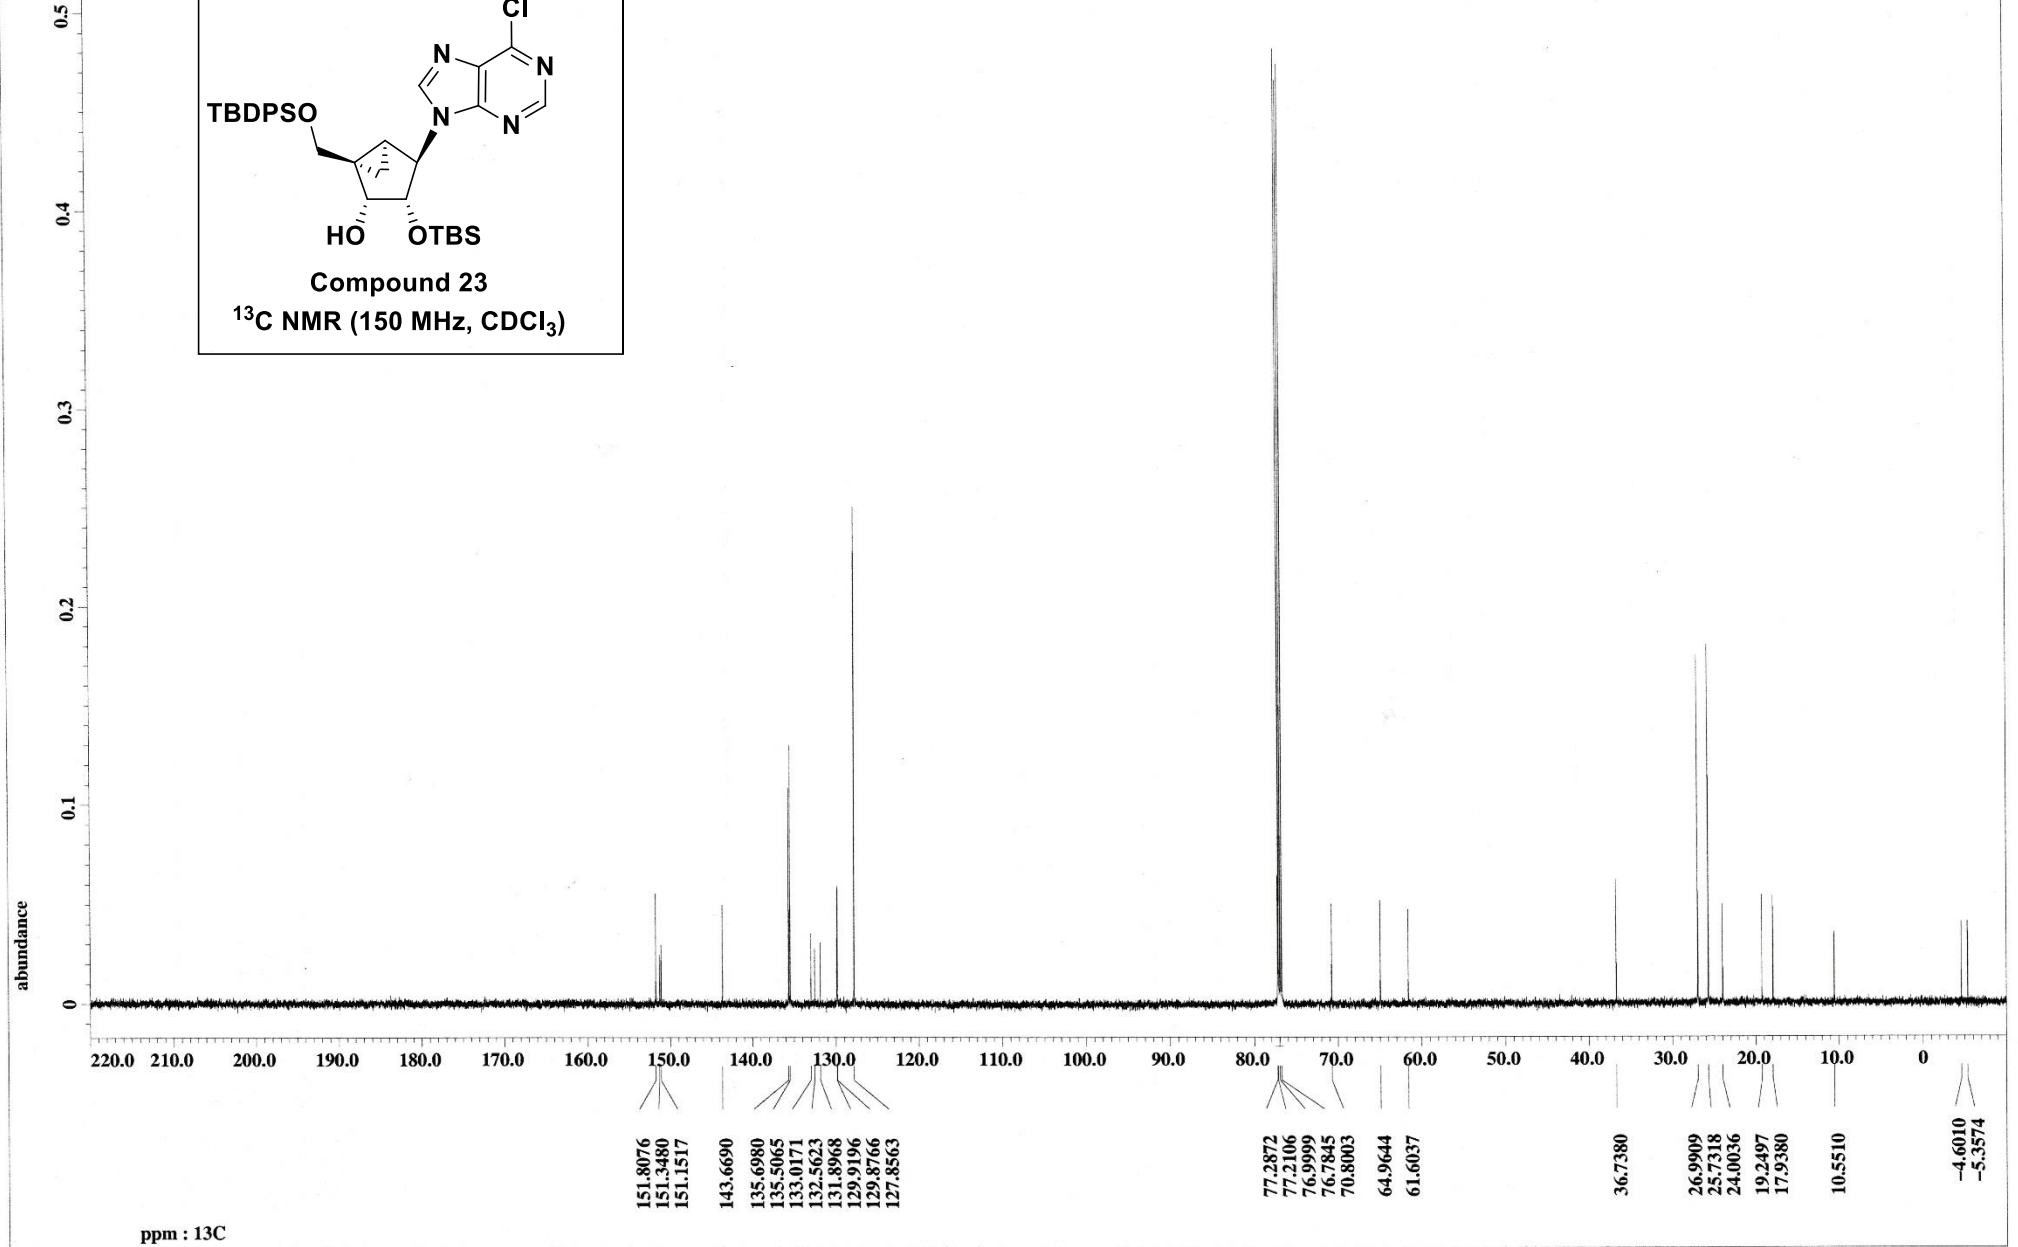

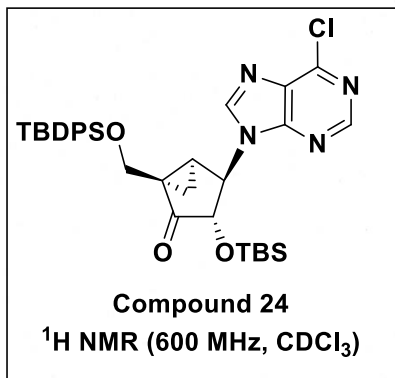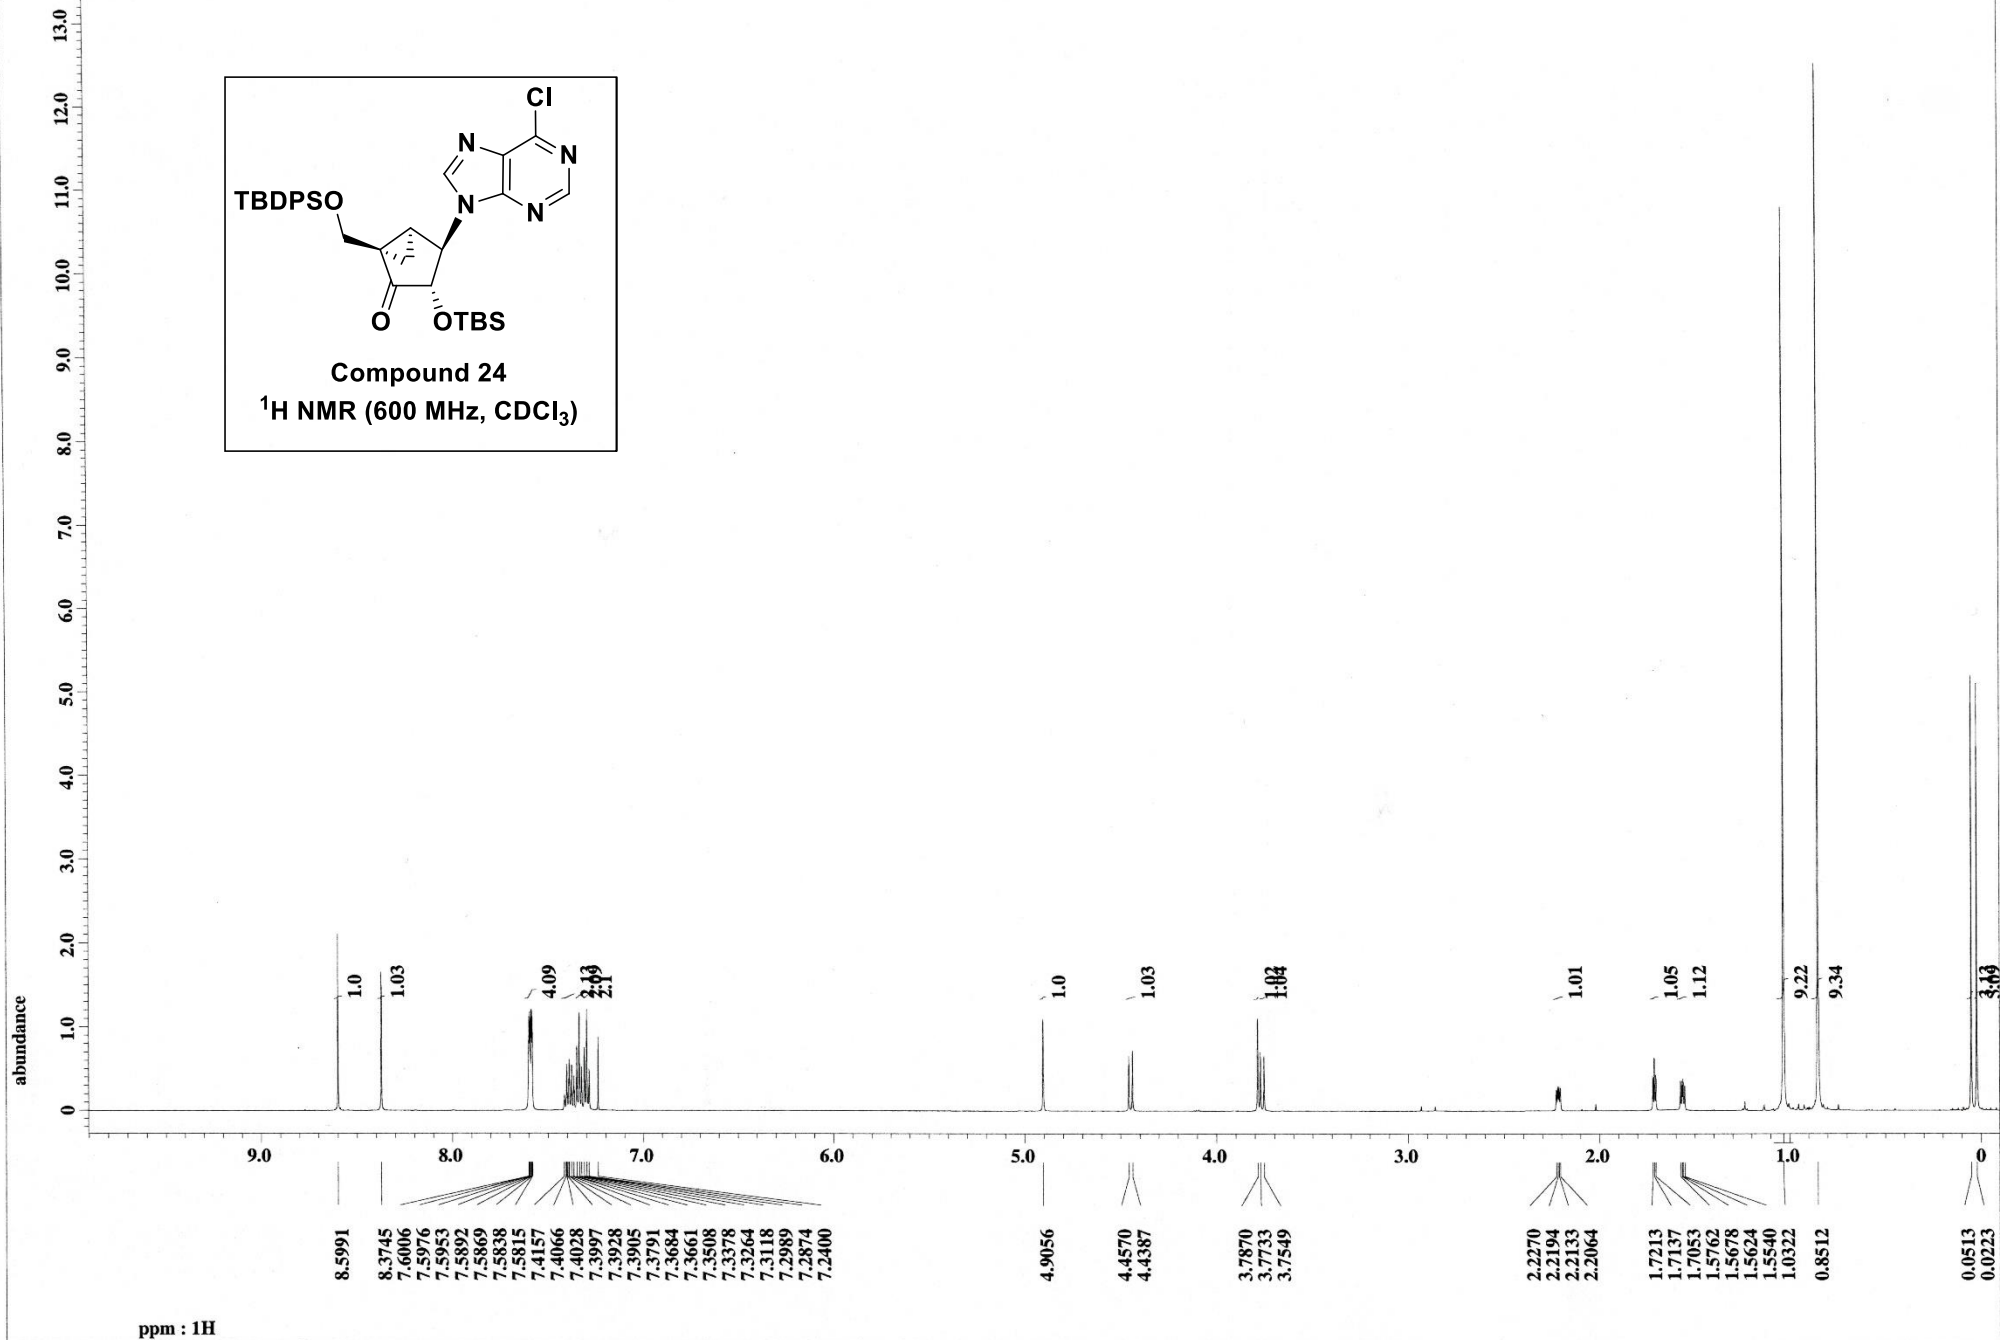

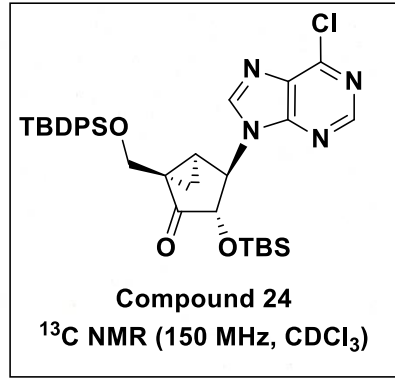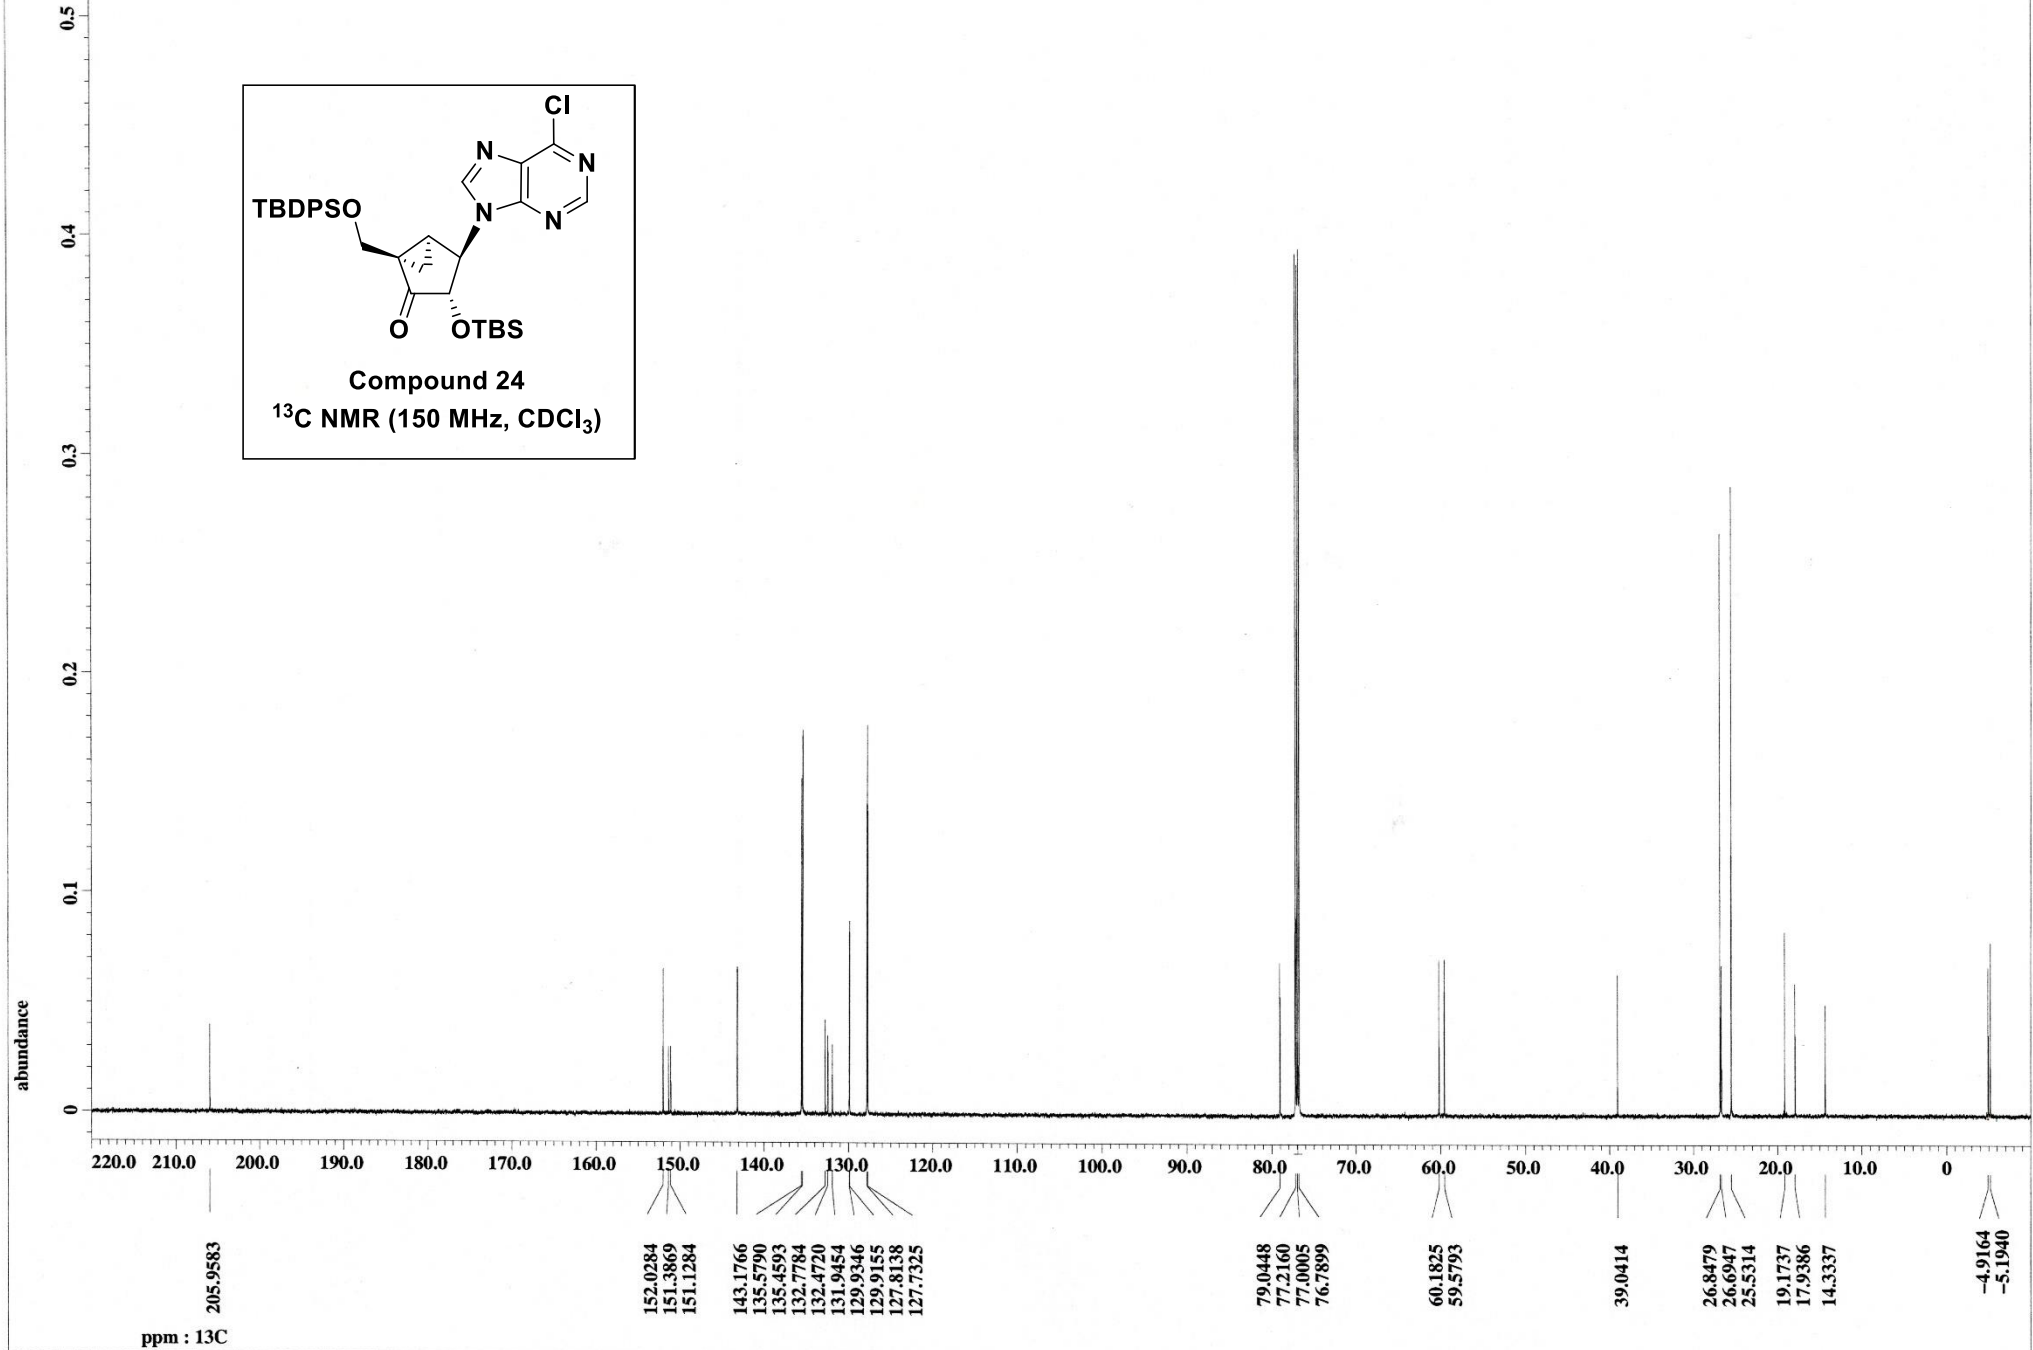



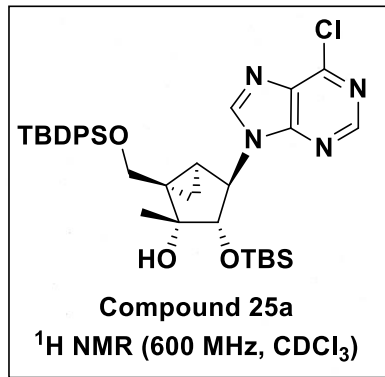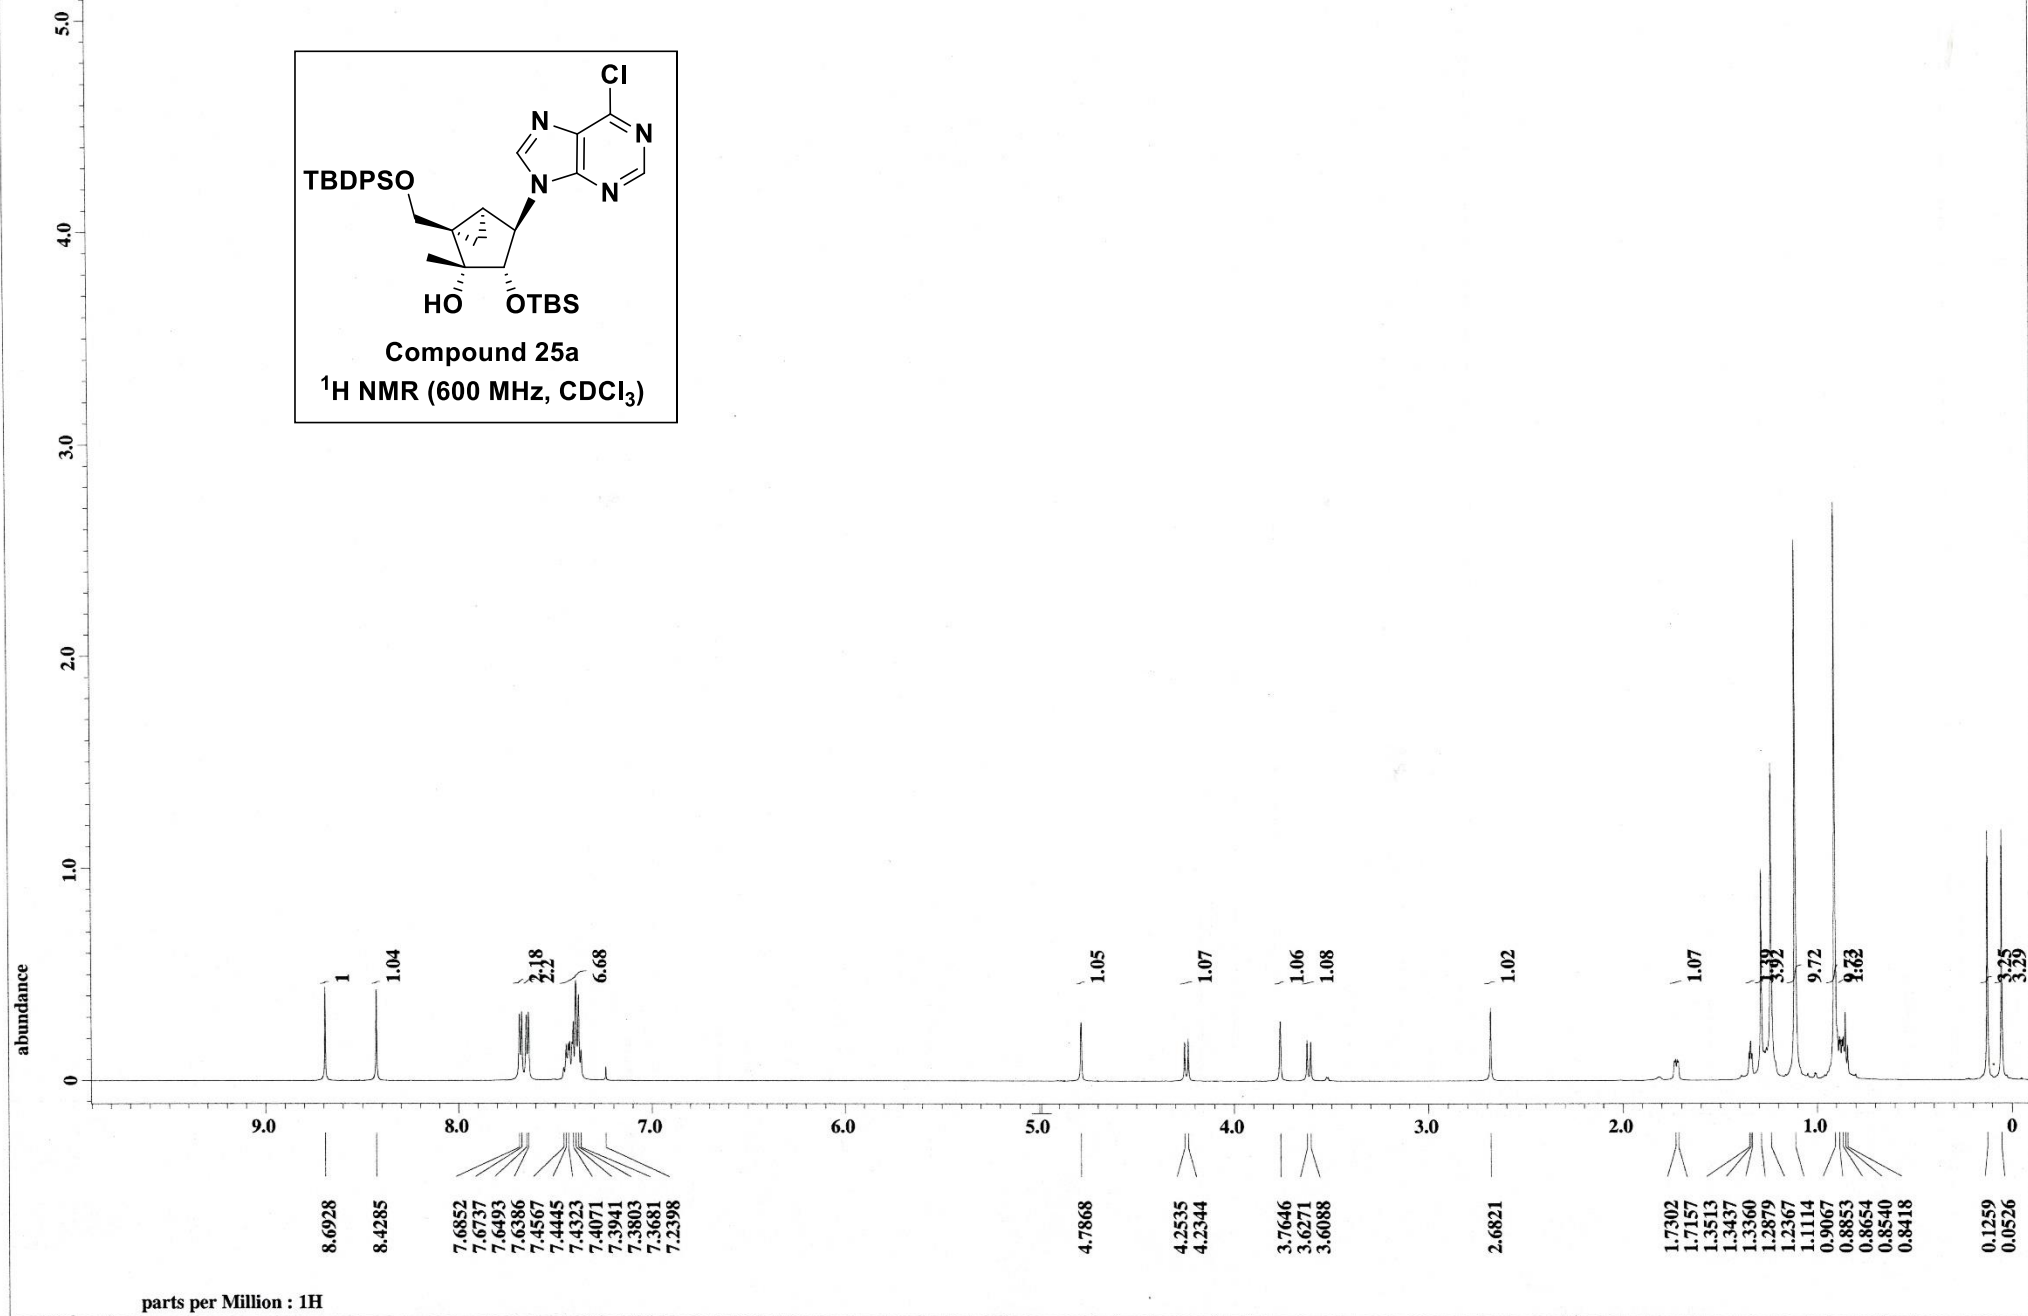

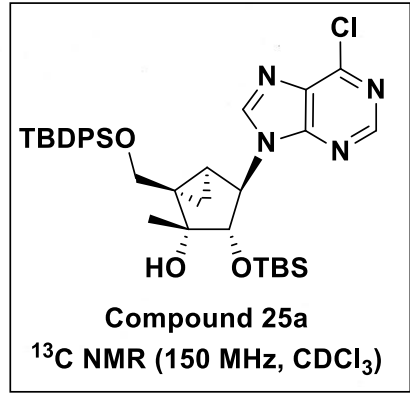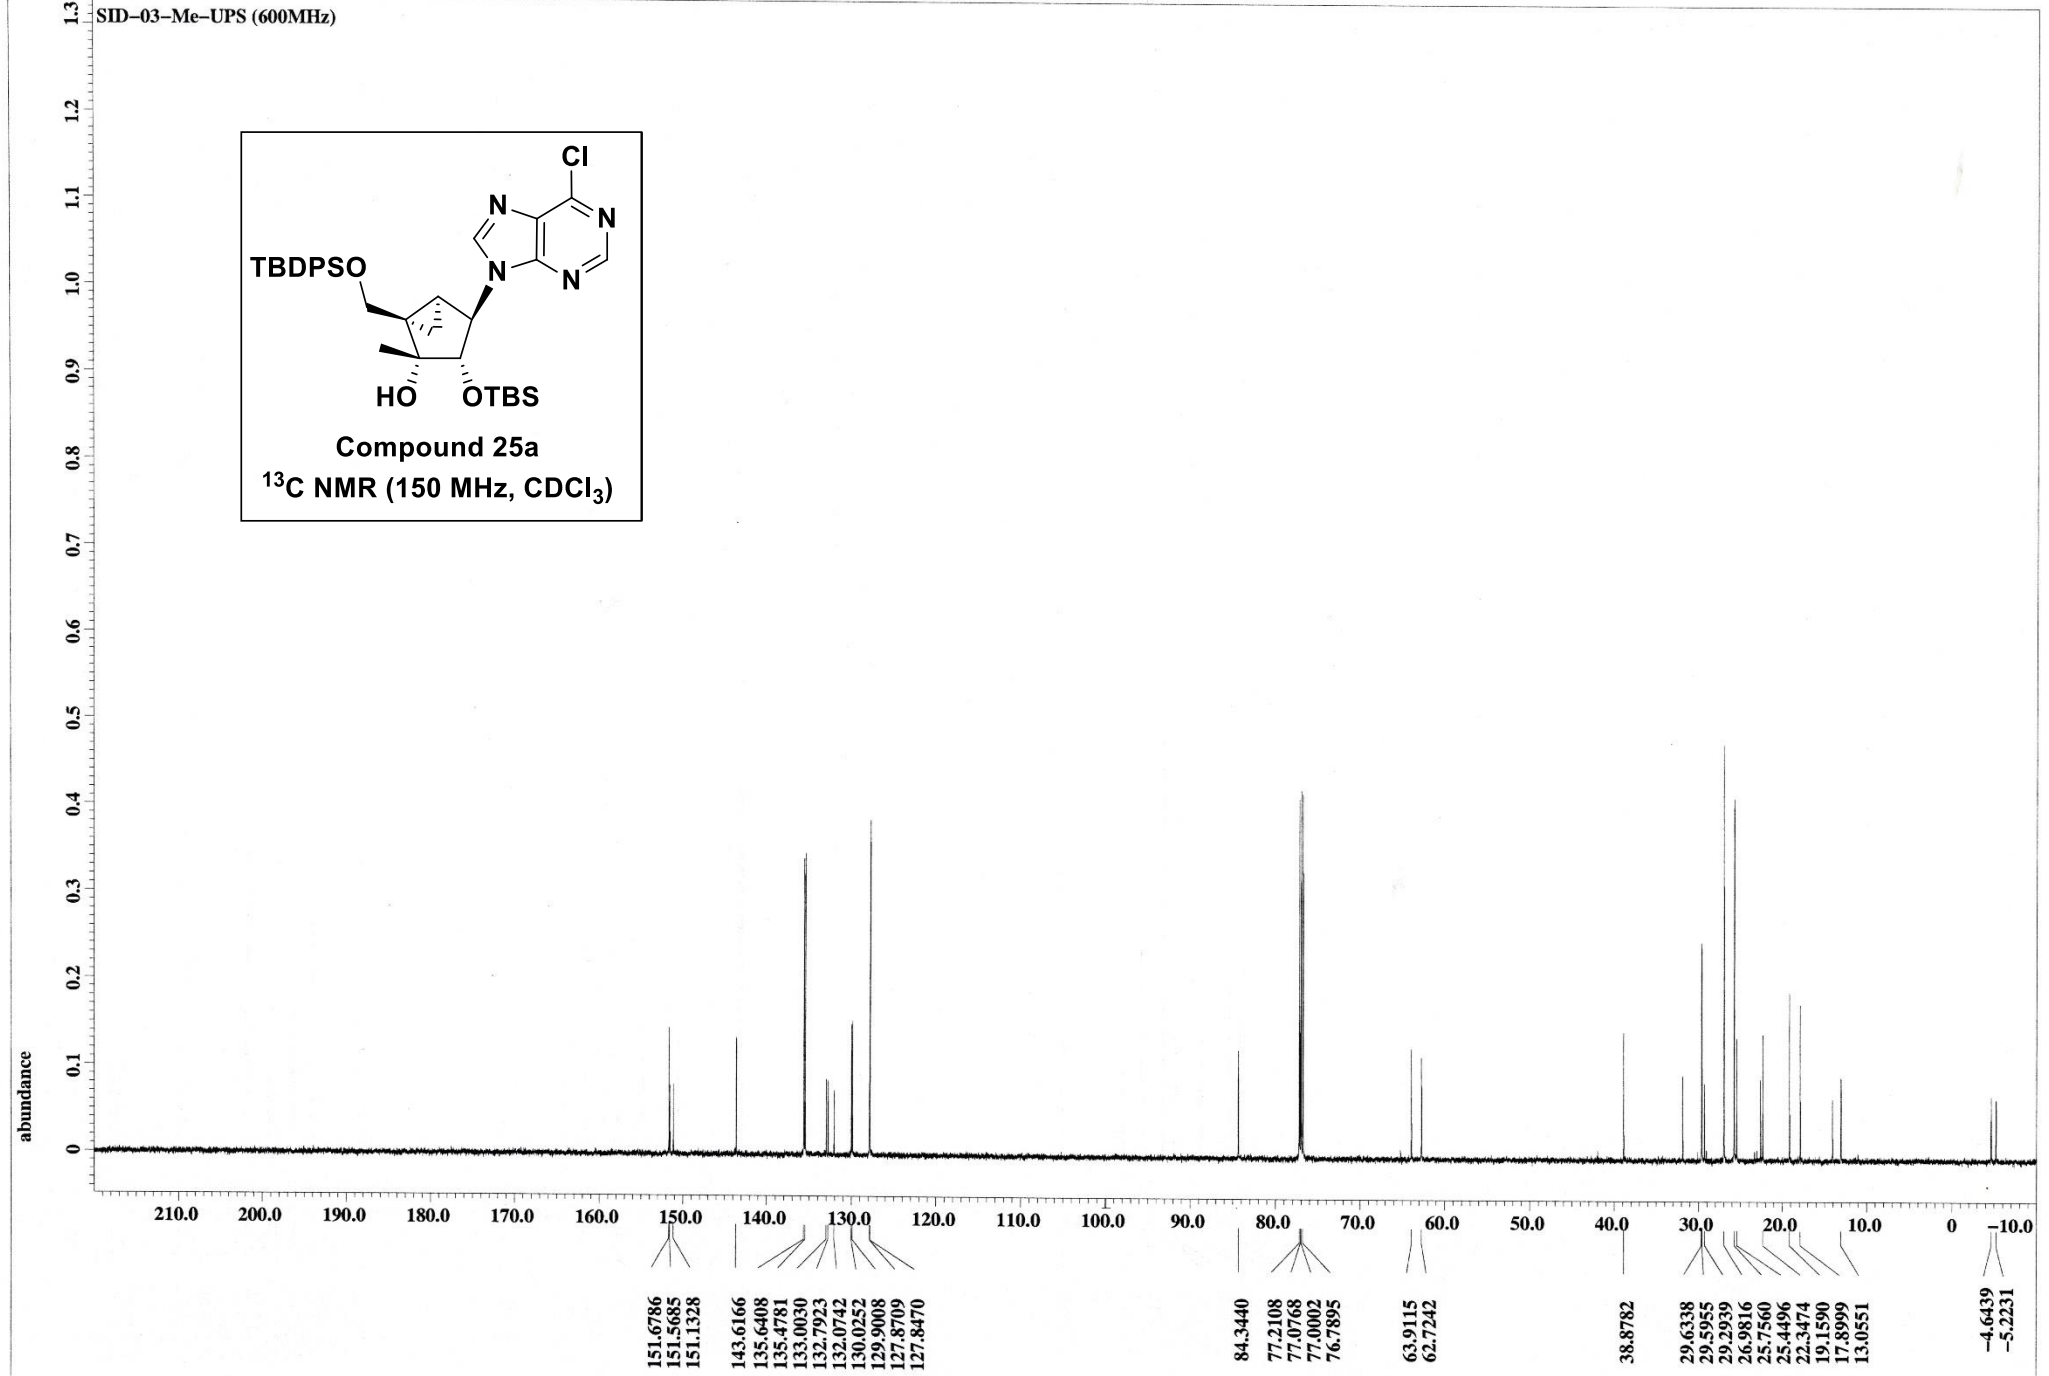

7.0  
6.0  
5.0  
4.0  
3.0  
2.0  
1.0  
0

abundance

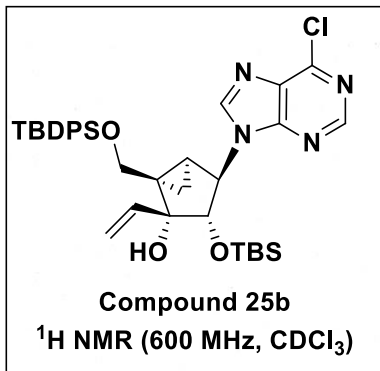

9.0

8.0

7.0

6.0

5.0

4.0

3.0

2.0

1.0

0

8.6518

8.3004

7.6678

7.6563

7.6541

7.6373

7.6350

7.6243

7.6220

7.4463

7.4340

7.4218

7.4195

7.4088

7.4065

7.3867

7.3745

7.3622

7.3508

7.2400

6.0292

6.0108

6.0009

5.9833

5.4363

5.4340

5.4081

5.4058

5.2759

5.0971

5.0948

5.0796

5.0765

4.7136

4.7091

4.1751

4.1567

4.1193

4.1139

3.4745

3.4677

3.4554

2.6686

2.0230

1.7411

1.7343

1.7259

1.7198

1.5601

1.4432

1.4363

1.4279

1.2499

1.2377

1.0937

0.9856

0.9764

0.9711

0.9619

0.9199

0.8916

0.8794

0.8748

0.8680

0.8168

0.6243

0.0505

0.0475

-0.0534

-0.1583

ppm :  $^1\text{H}$

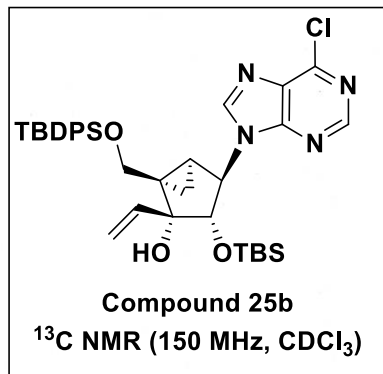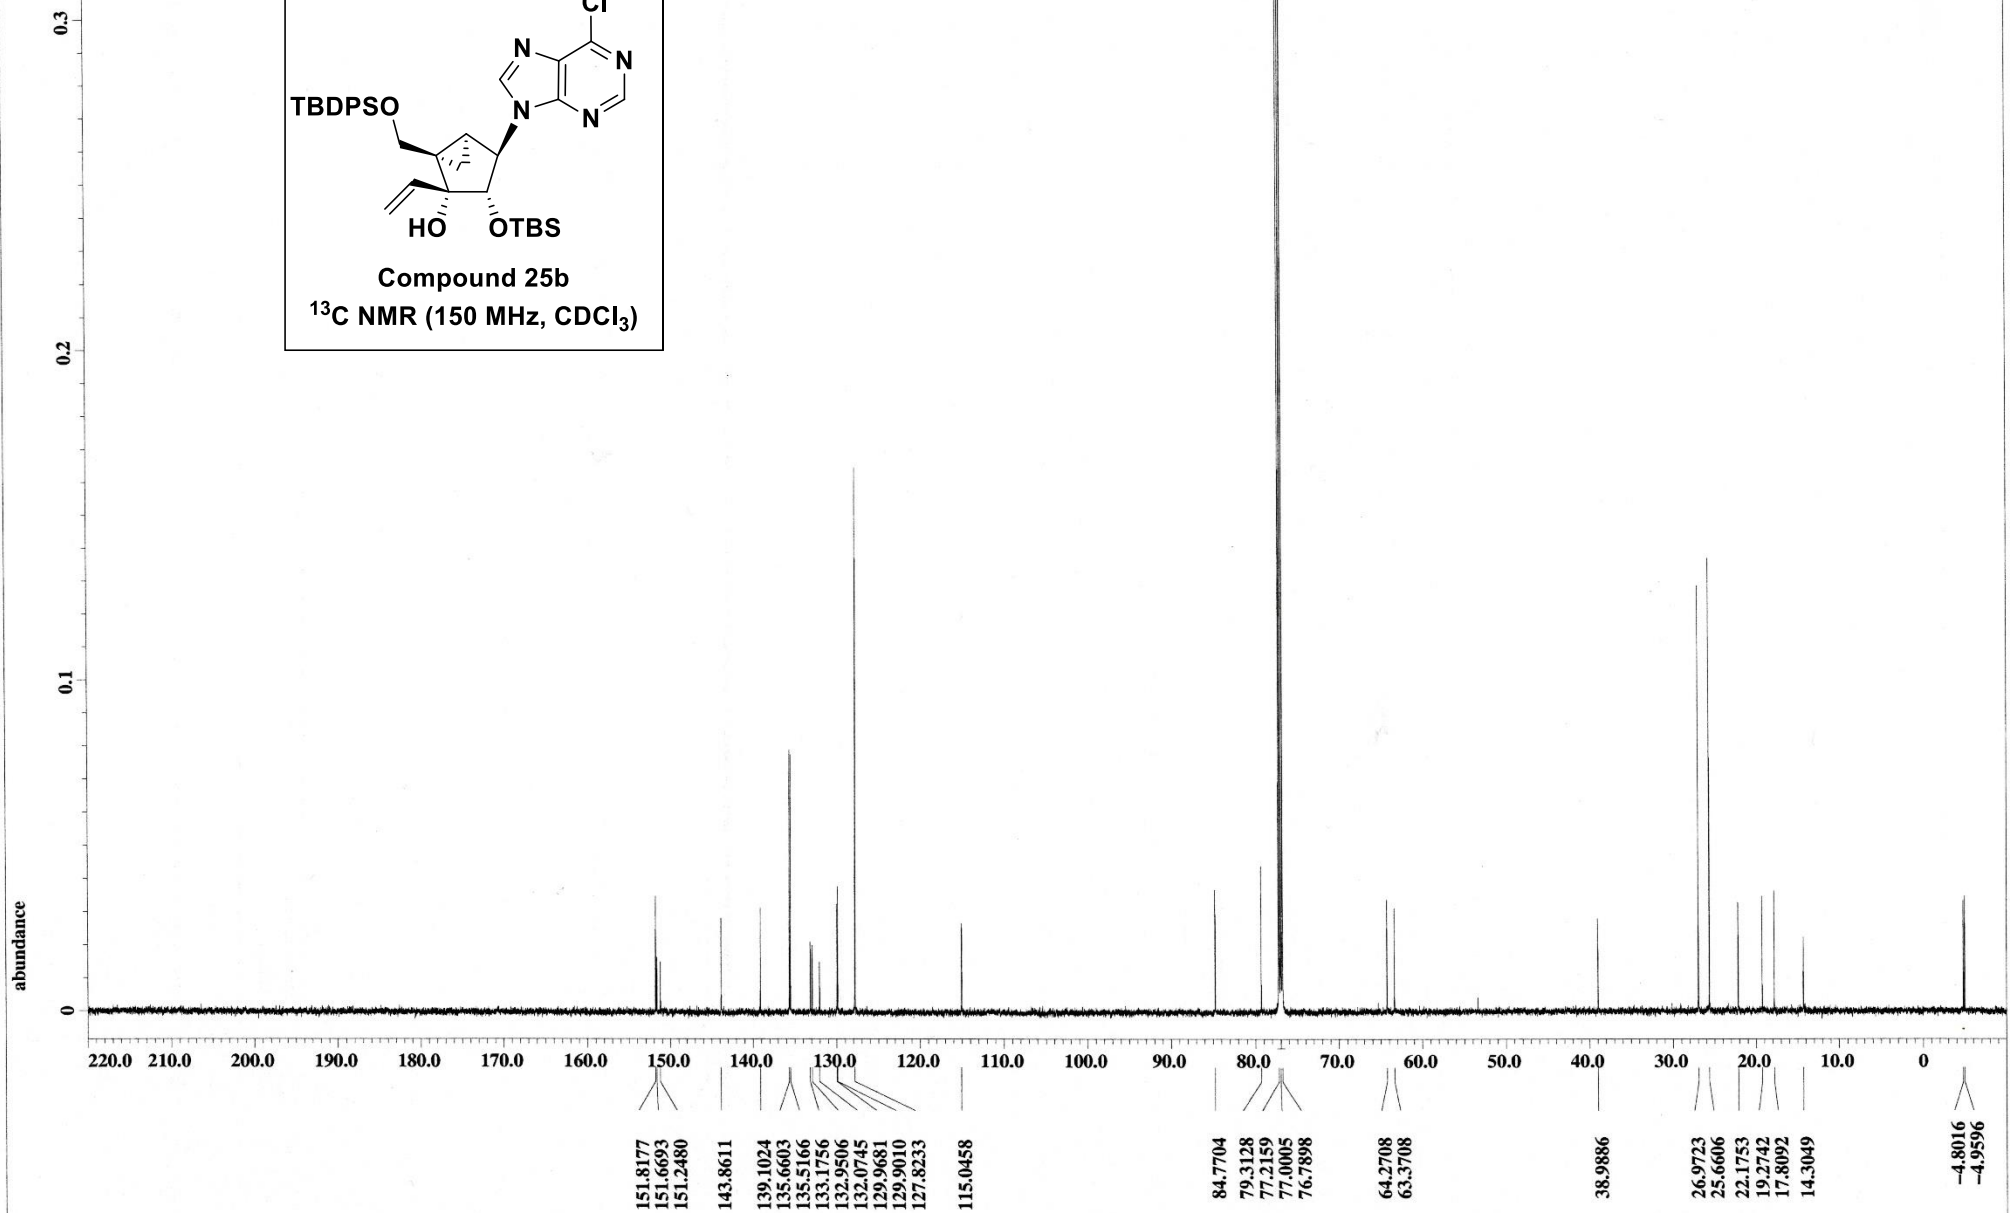

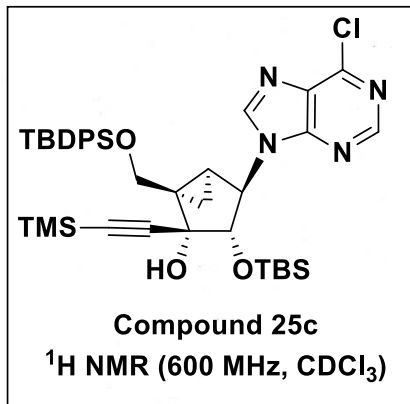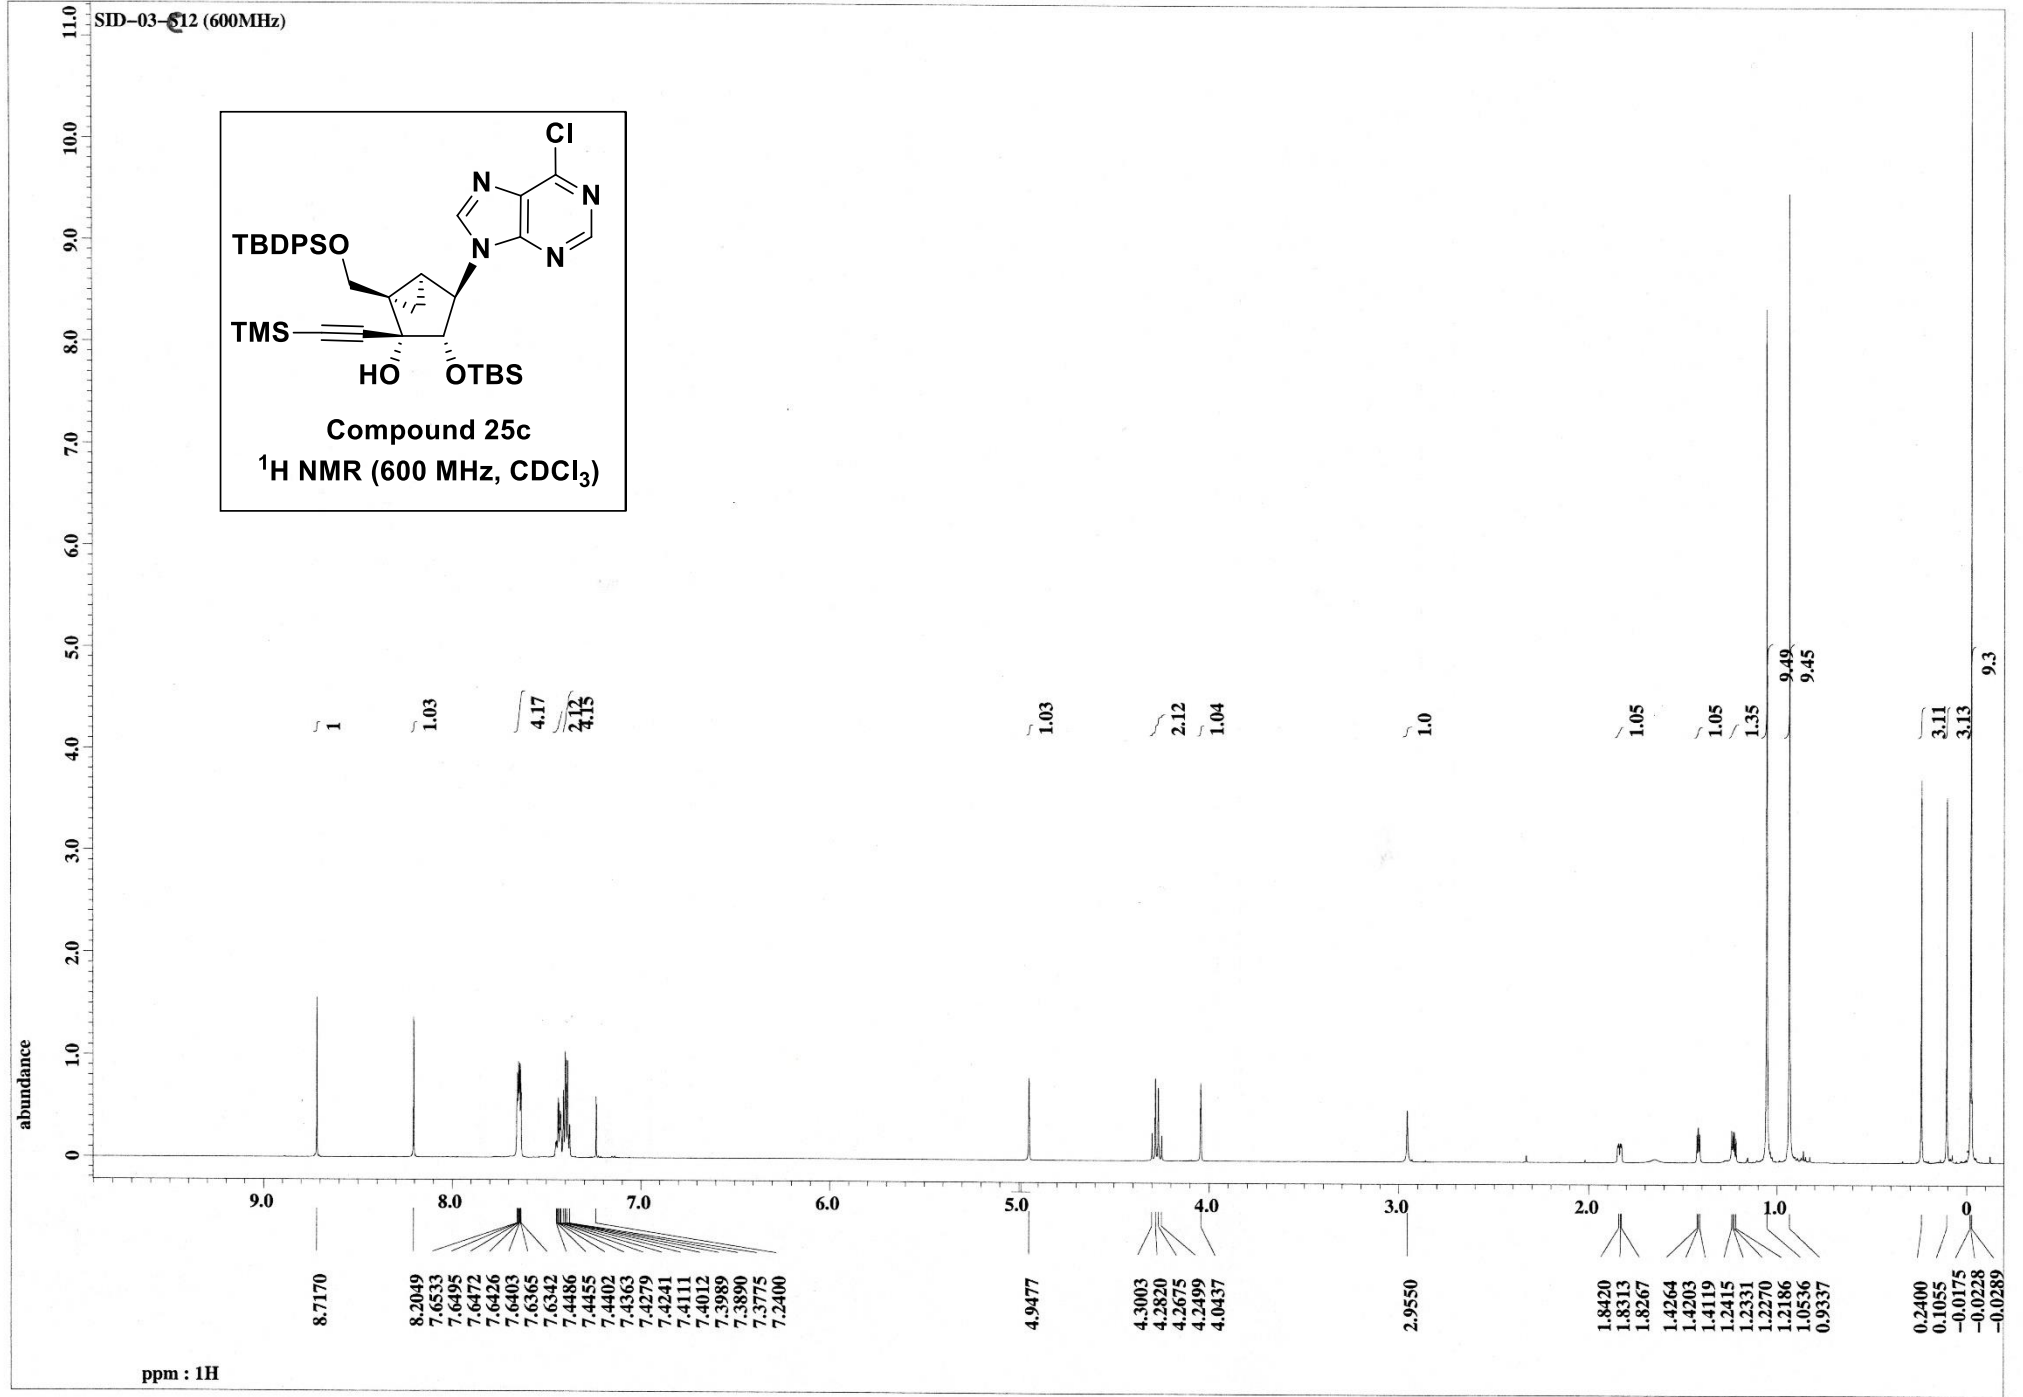

0.5  
0.4  
0.3  
0.2  
0.1  
0  
abundance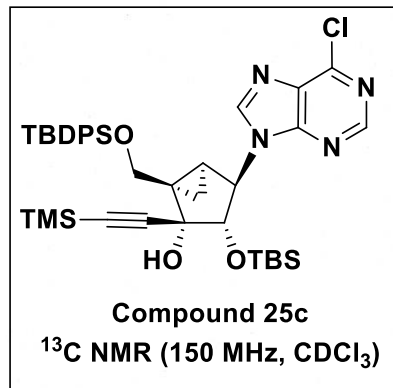

210.0 200.0 190.0 180.0 170.0 160.0 150.0 140.0 130.0 120.0 110.0 100.0 90.0 80.0 70.0 60.0 50.0 40.0 30.0 20.0 10.0 0 -10.0

151.6685  
151.5105  
150.9408  
144.2289  
135.5110  
135.4680  
133.0886  
133.0264  
131.8487  
130.0343  
129.9098  
127.9230  
127.8321

103.9574

94.1145

84.0658

77.2103

76.9996

76.7890

74.7256

62.2928

61.6082

39.5432

26.9093

25.7651

22.4953

19.3308

17.9808

10.1199

-0.4985

-4.6300

-5.1854

ppm : <sup>13</sup>C

SID-C16 (600MHz)

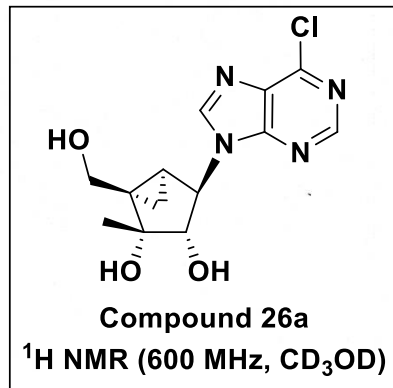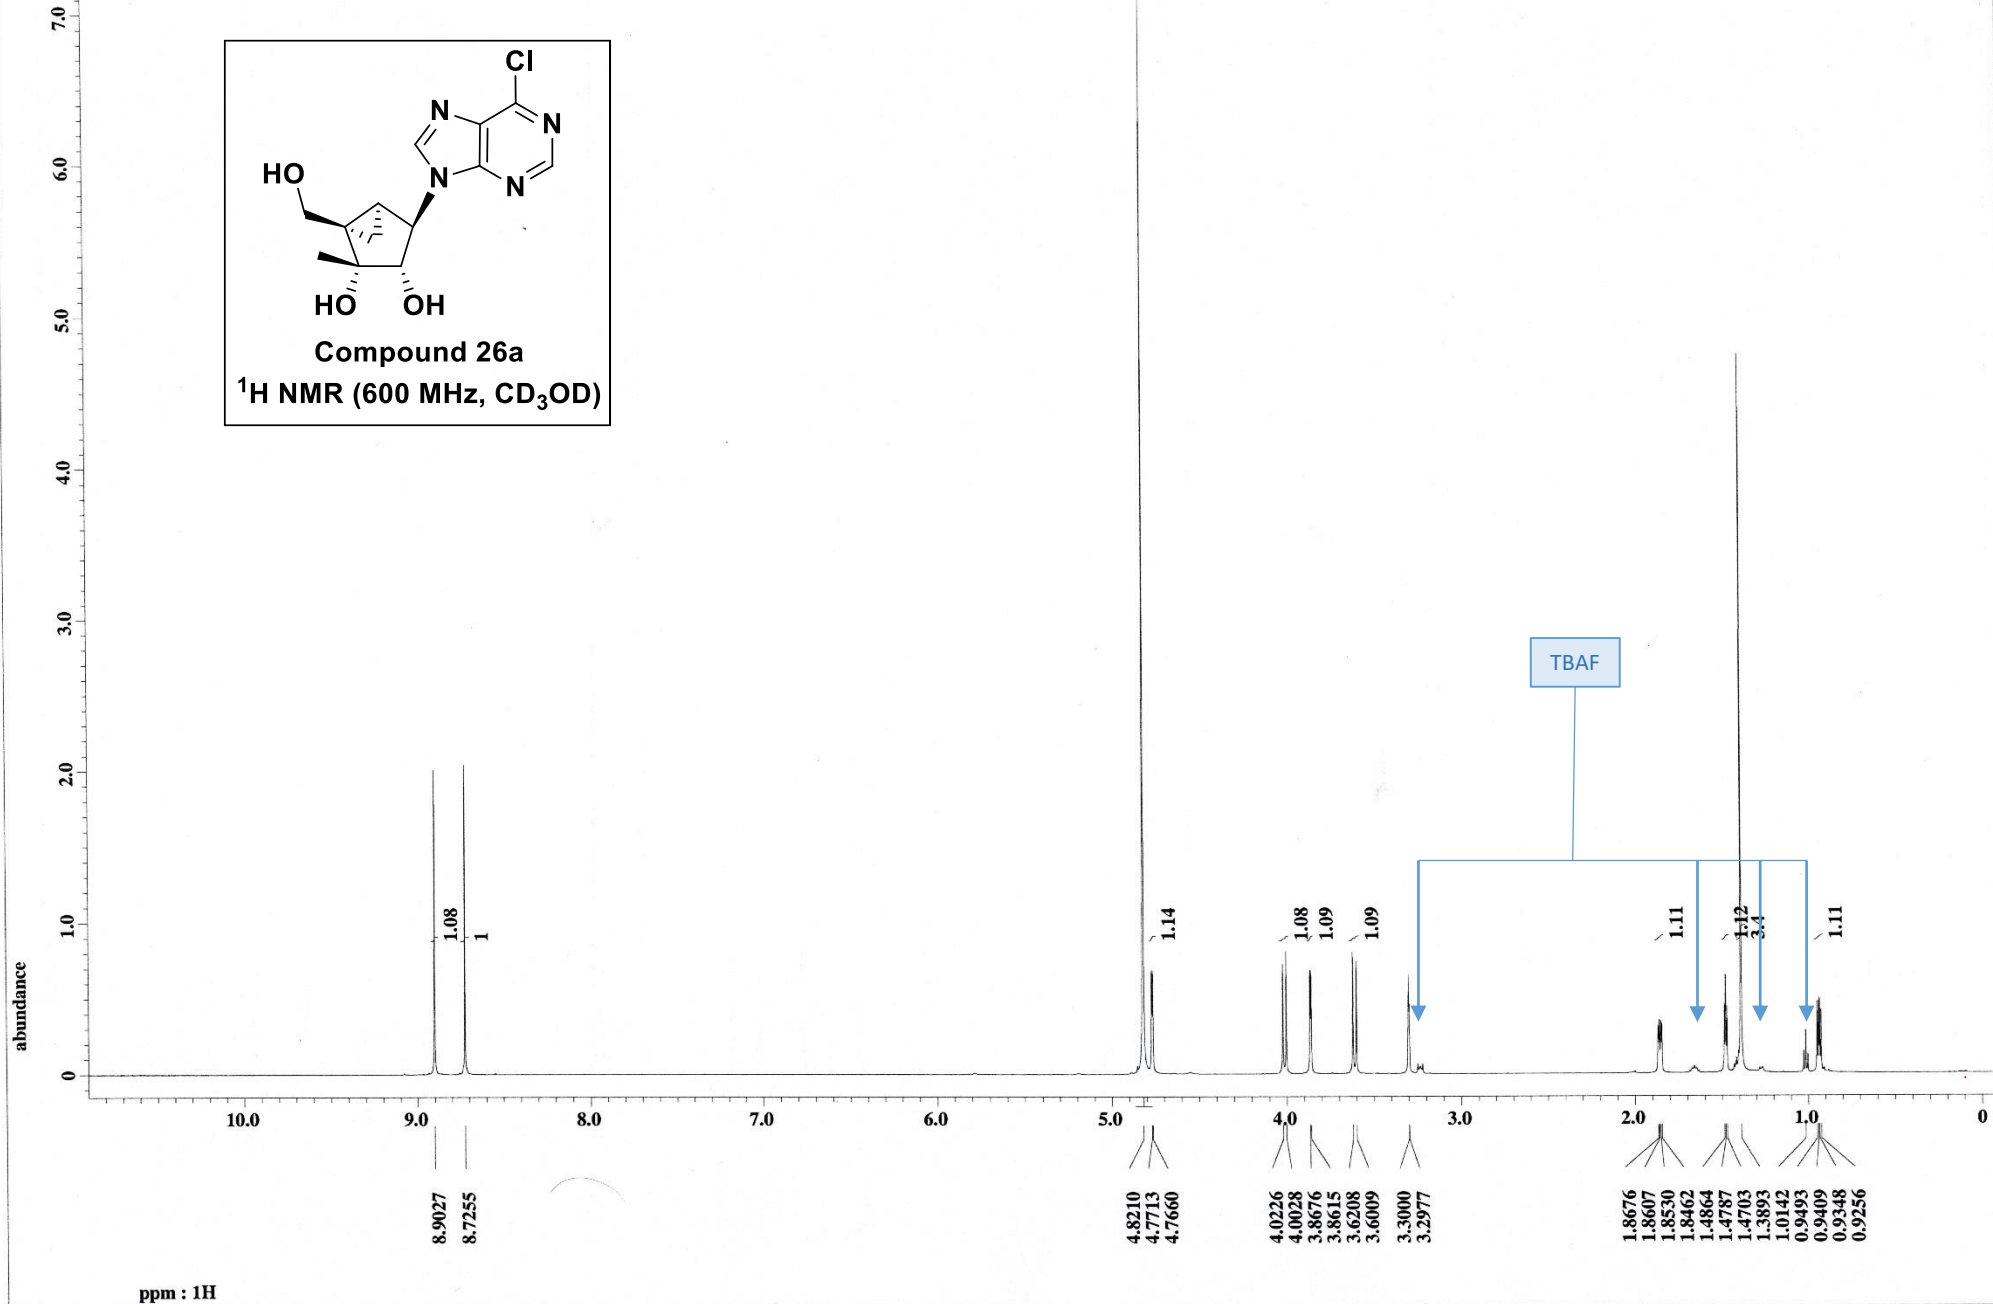

SID-C16 (600MHz)

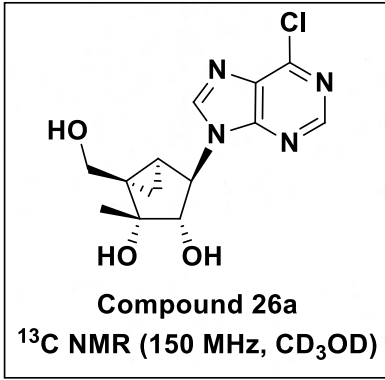

abundance

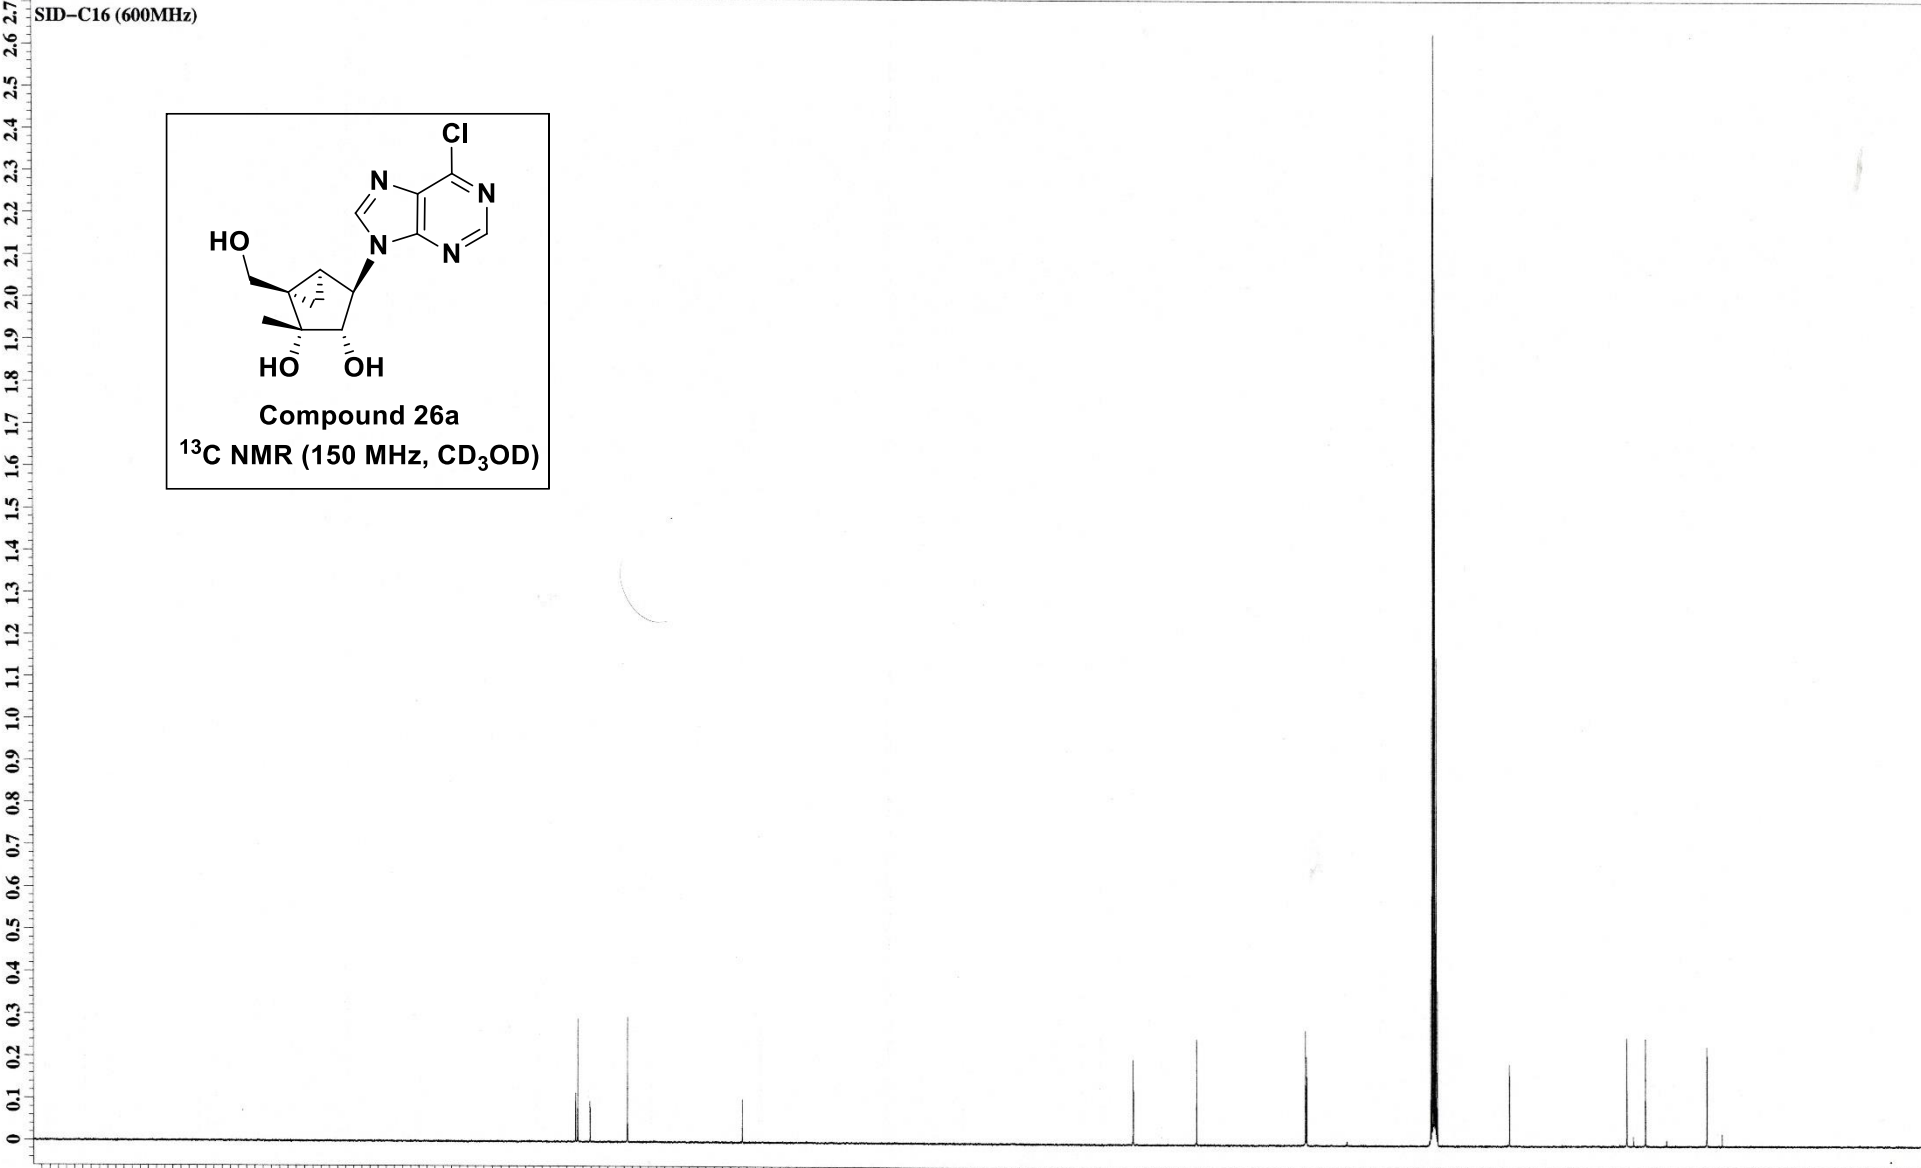

ppm : 13C

- 153.9165
- 153.6484
- 152.1499
- 147.5875
- 133.5988
- 86.1749
- 78.5485
- 65.3688
- 65.2348
- 50.2263
- 50.0875
- 49.9439
- 49.8002
- 49.6614
- 49.5178
- 49.3742
- 40.6036
- 26.3564
- 24.0871
- 16.5661



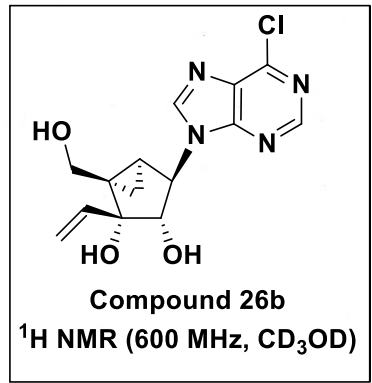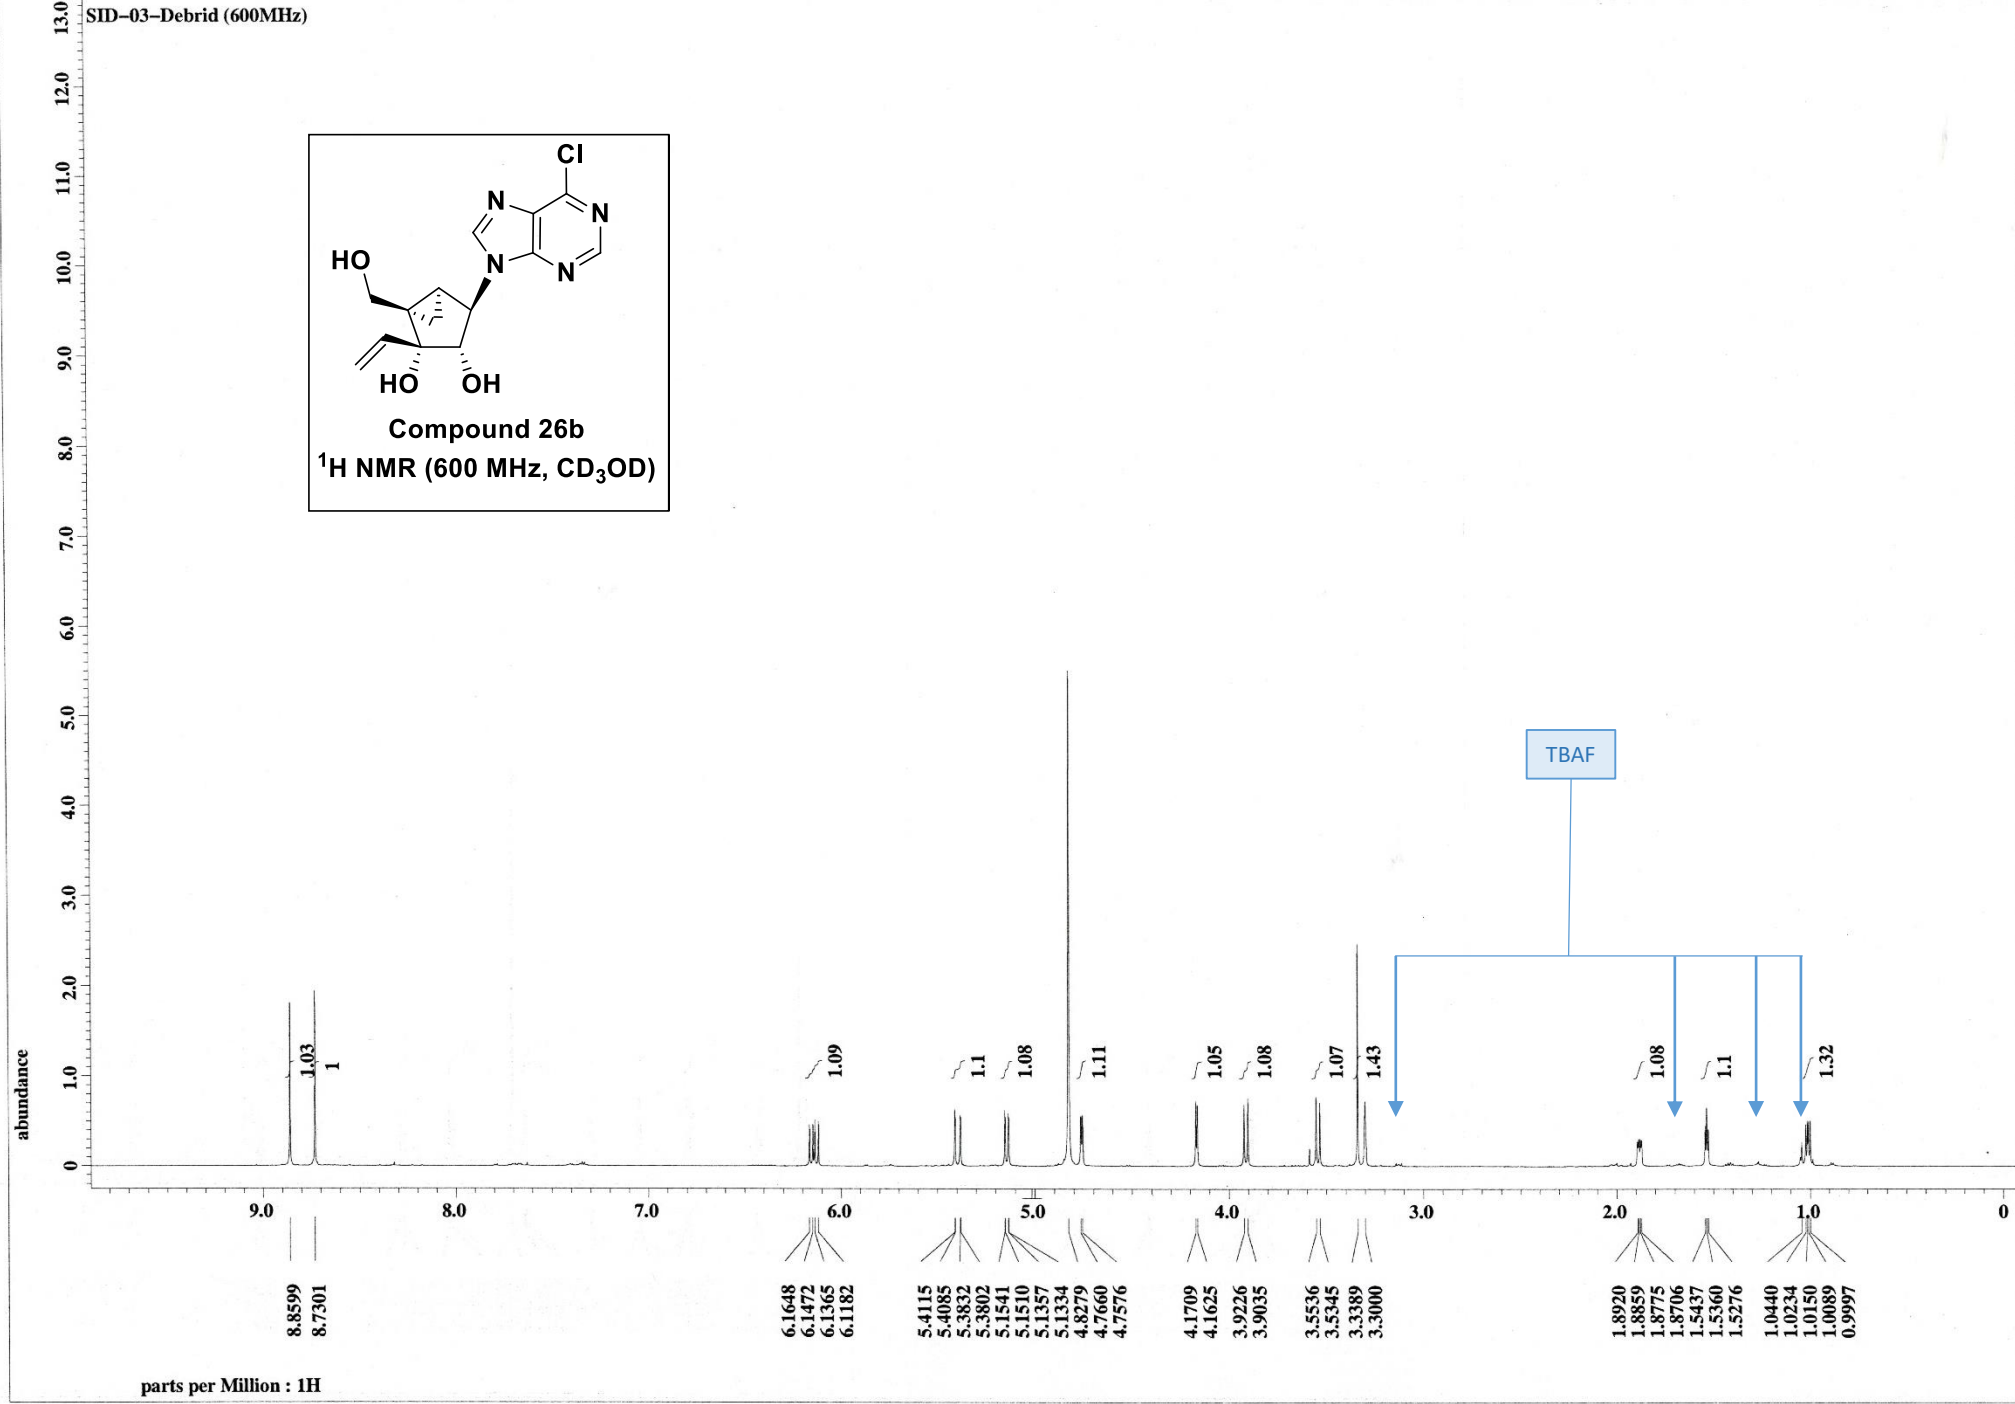

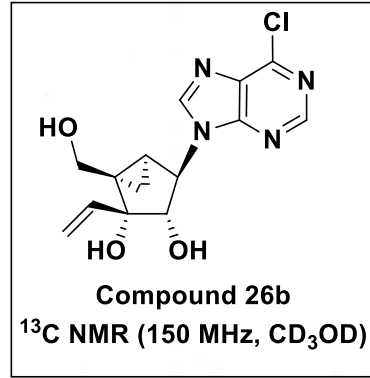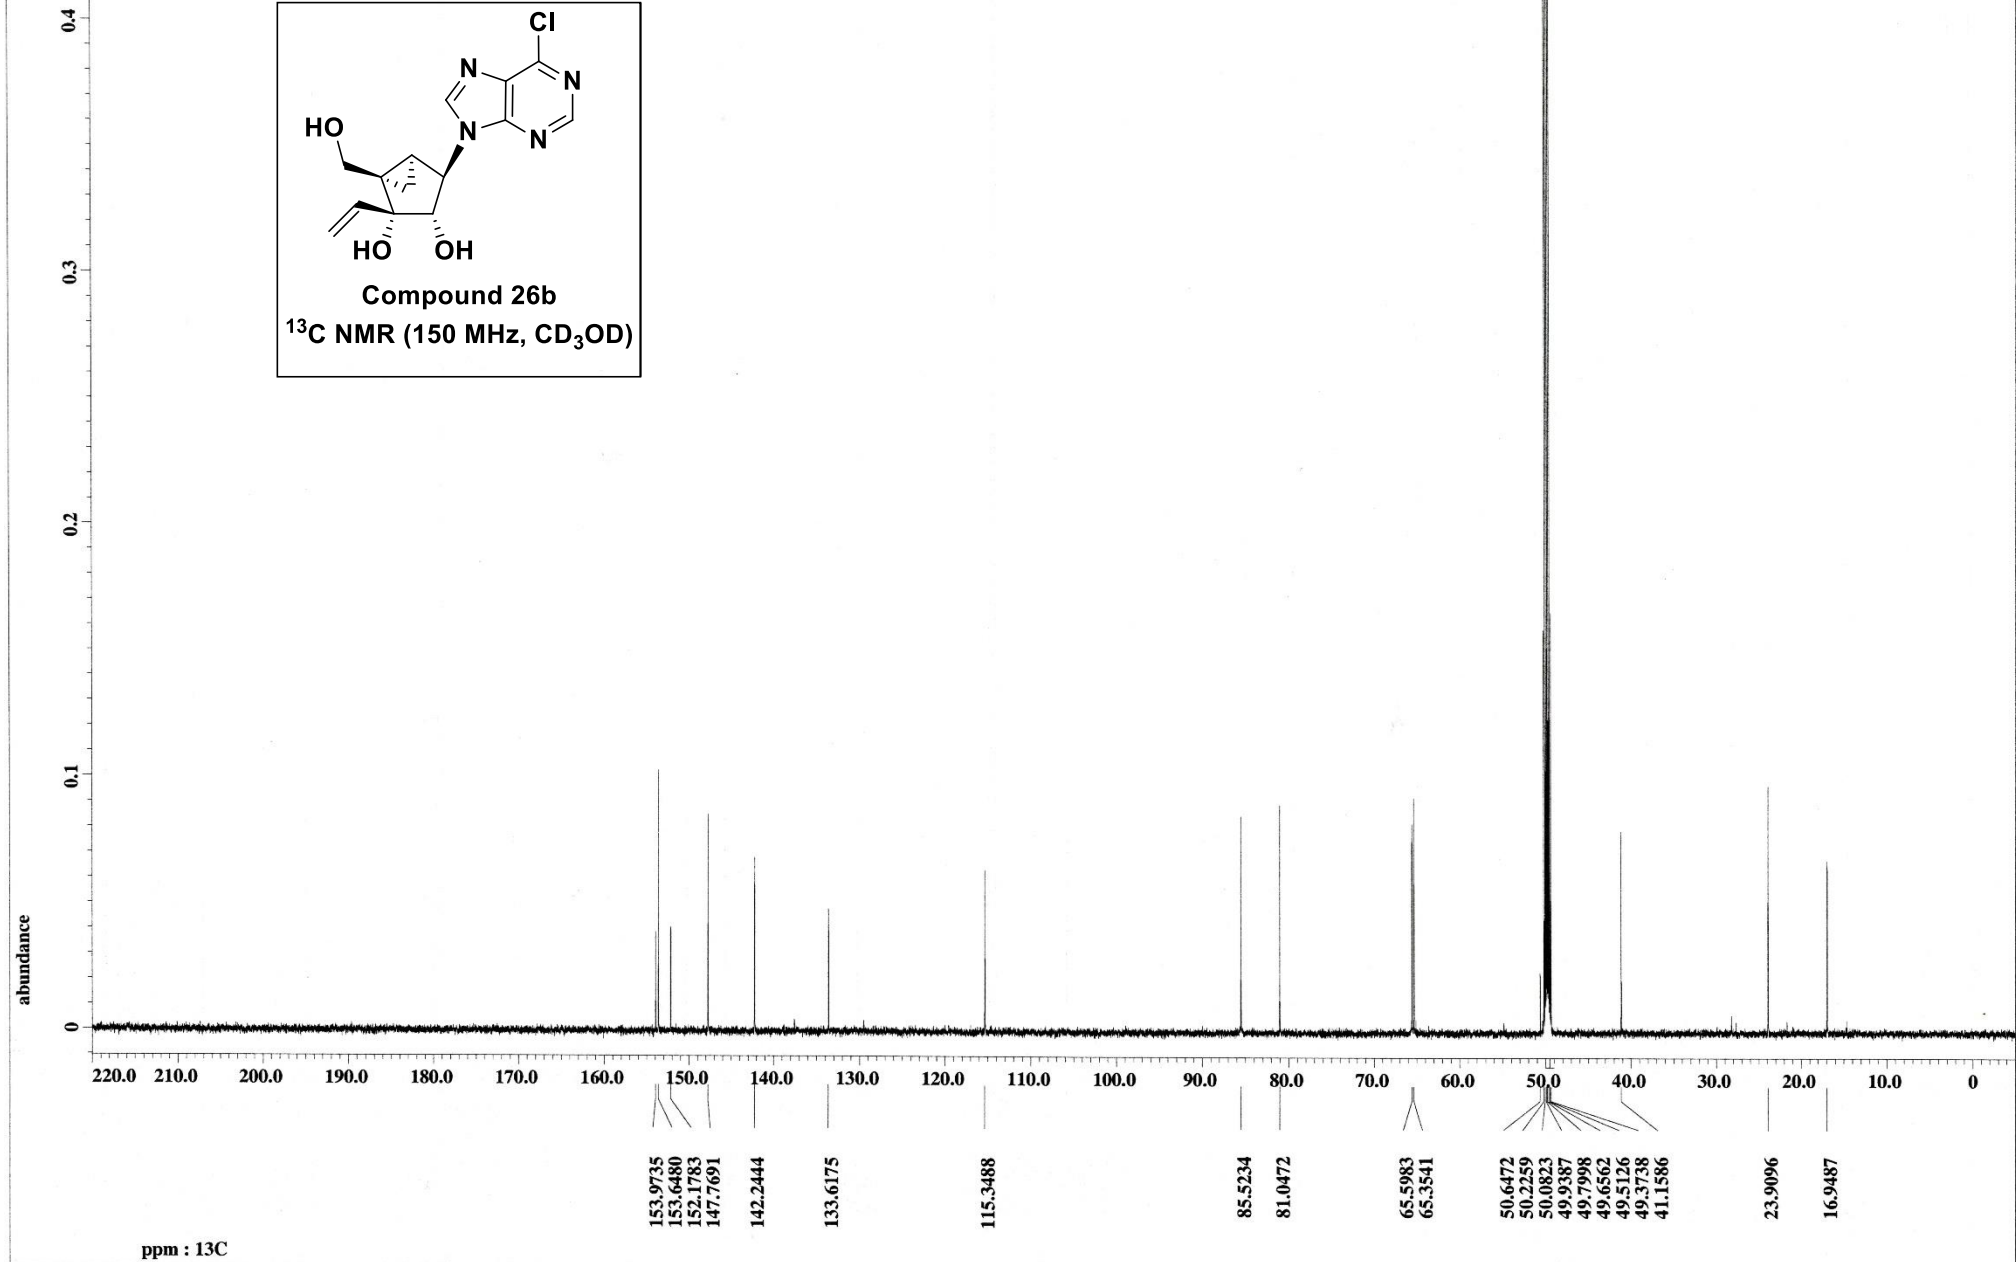

SID-C13 (600MHz)

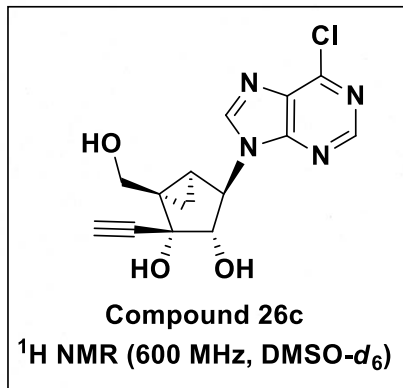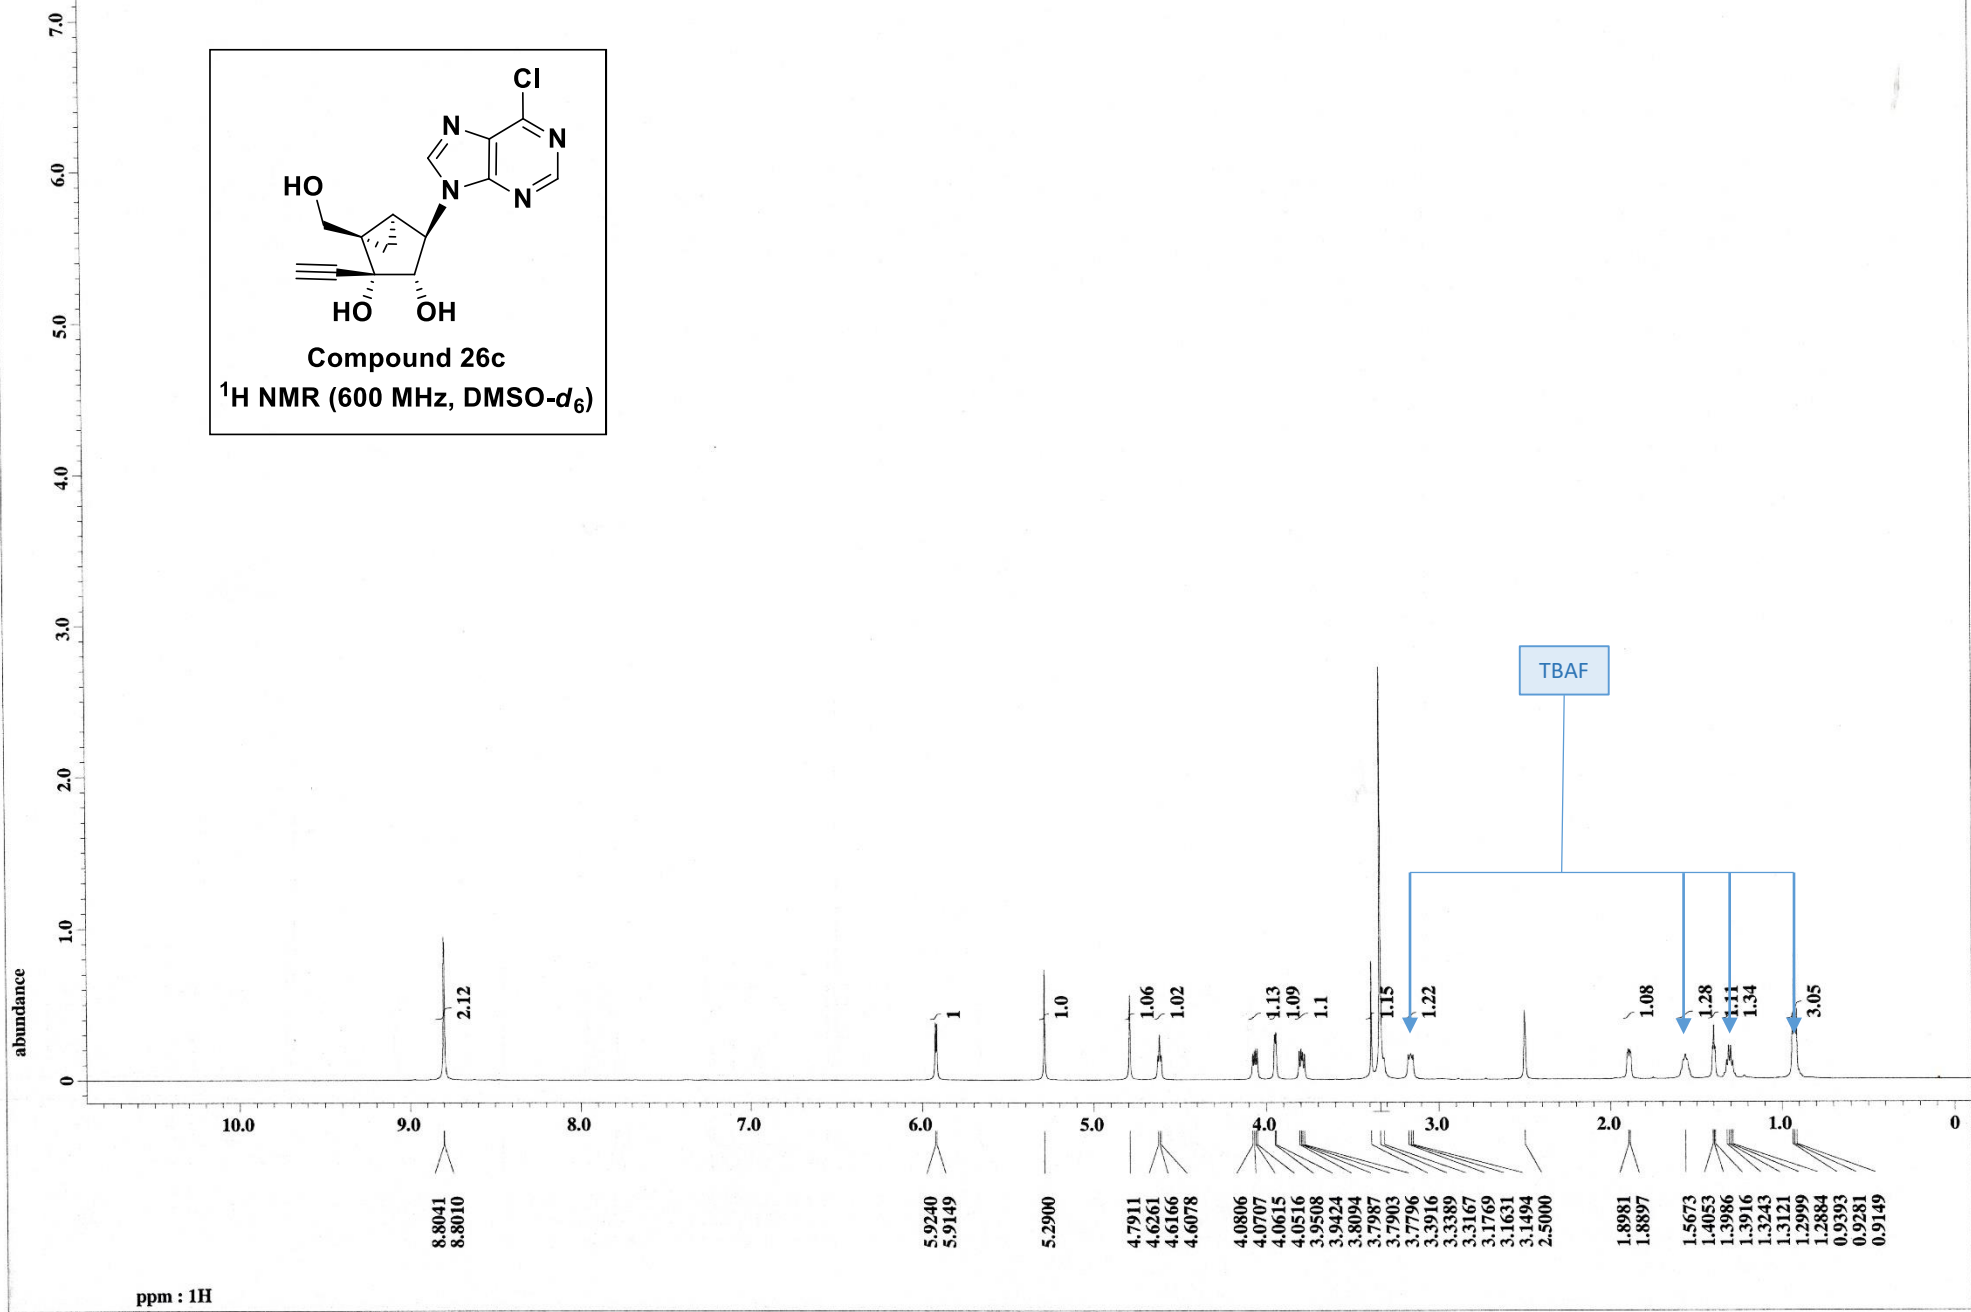

ppm :  $^1\text{H}$

SID-C13 (600MHz)

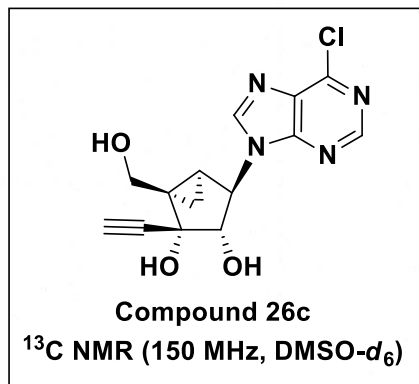

abundance

220.0 210.0 200.0 190.0 180.0 170.0 160.0 150.0 140.0 130.0 120.0 110.0 100.0 90.0 80.0 70.0 60.0 50.0 40.0 30.0 20.0 10.0 0

151.5514  
151.4365  
148.9088  
145.9980  
  
131.1859  
  
85.4329  
82.8956  
77.4475  
73.5027  
  
62.0609  
59.7821  
57.5272  
  
39.9193  
39.7756  
39.6368  
39.4980  
39.3591  
39.2203  
39.0815  
38.8325  
23.0437  
21.3873  
19.1803  
  
13.4450  
10.5822

ppm : 13C

SID-C17 (600MHz)

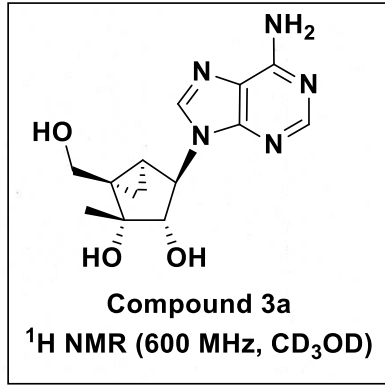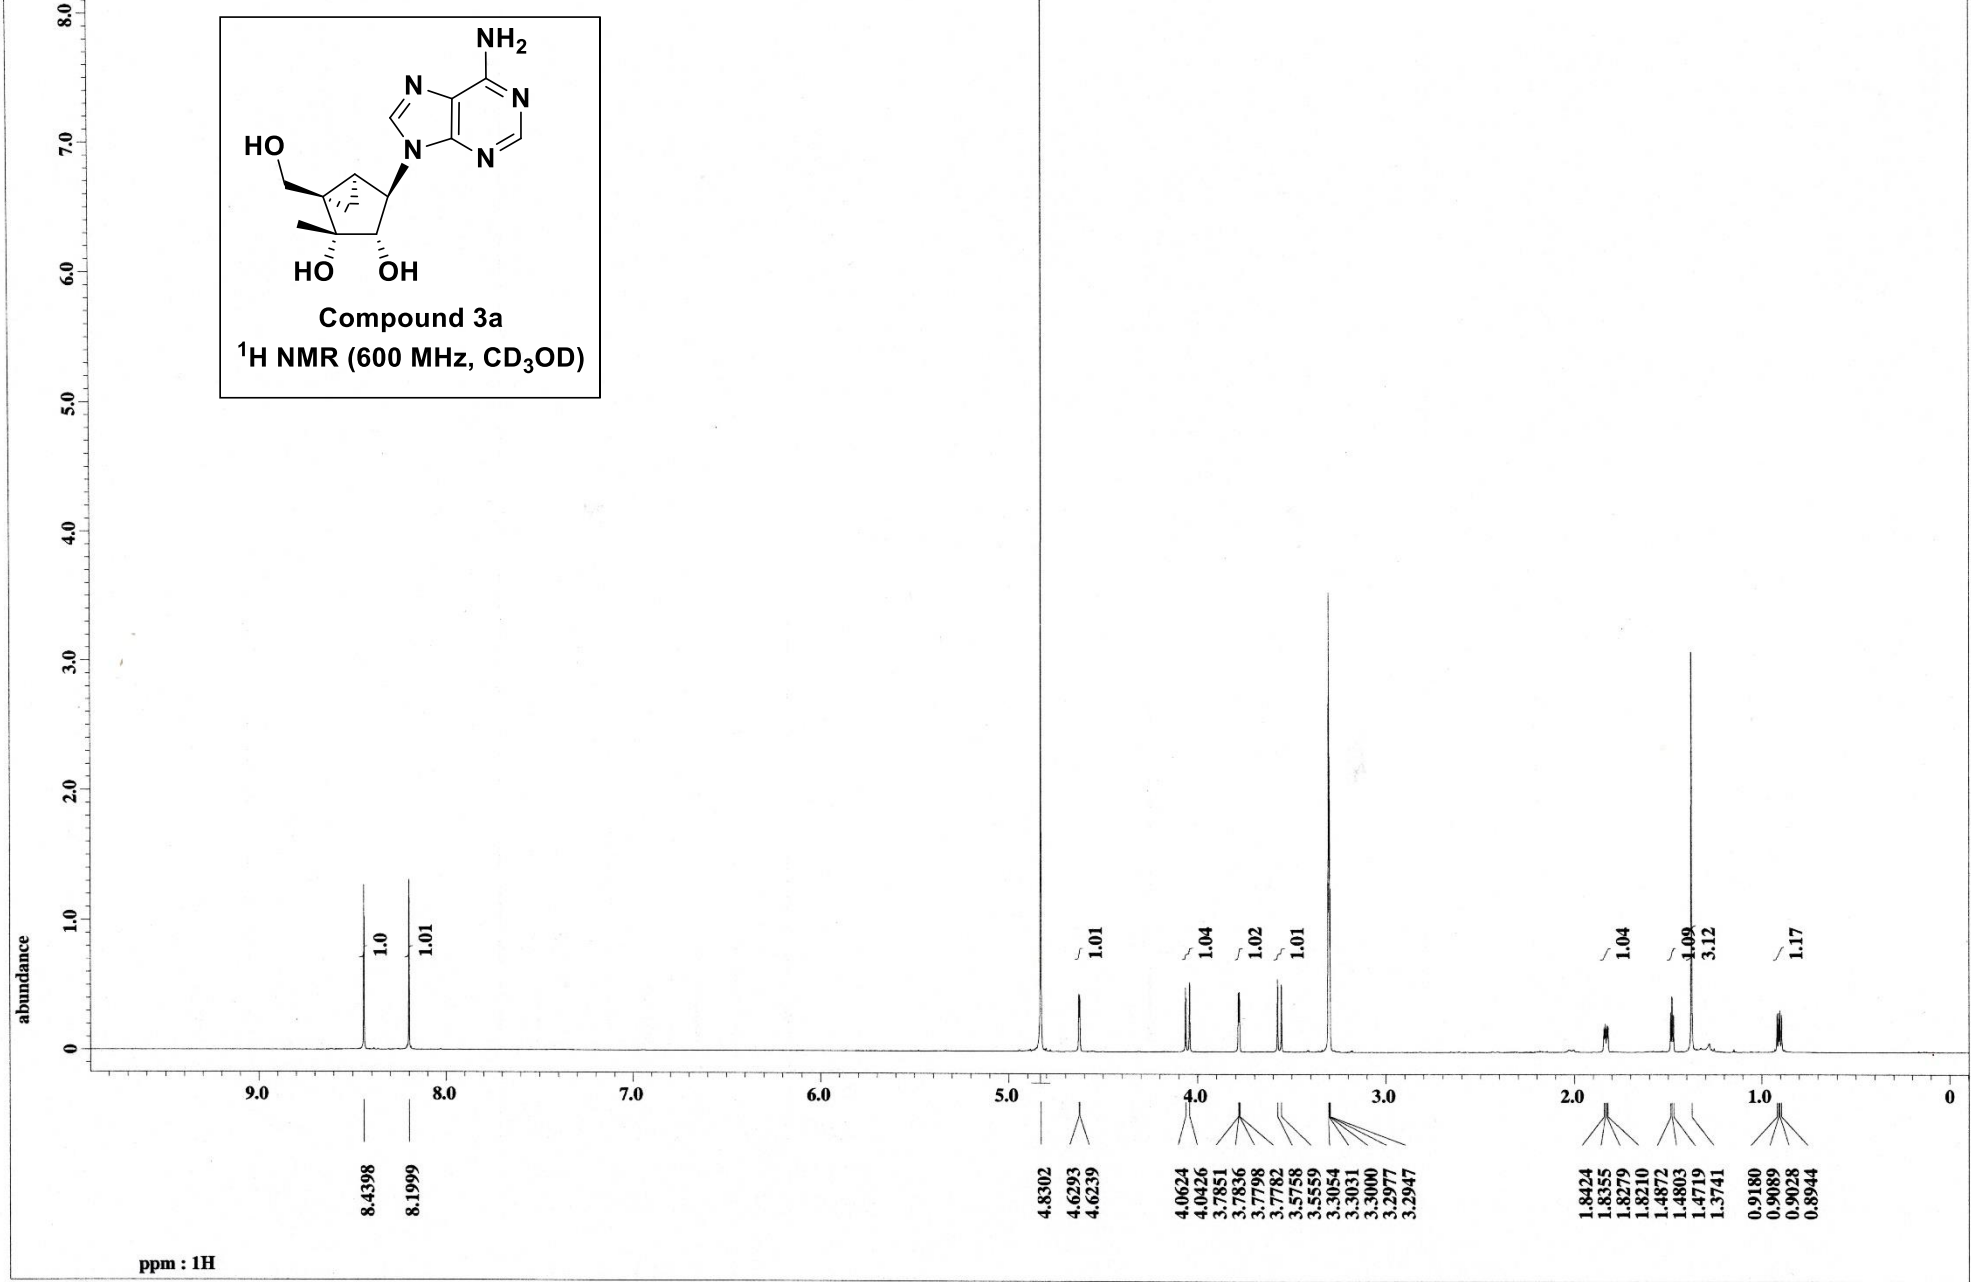

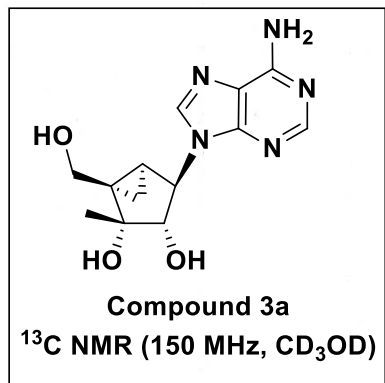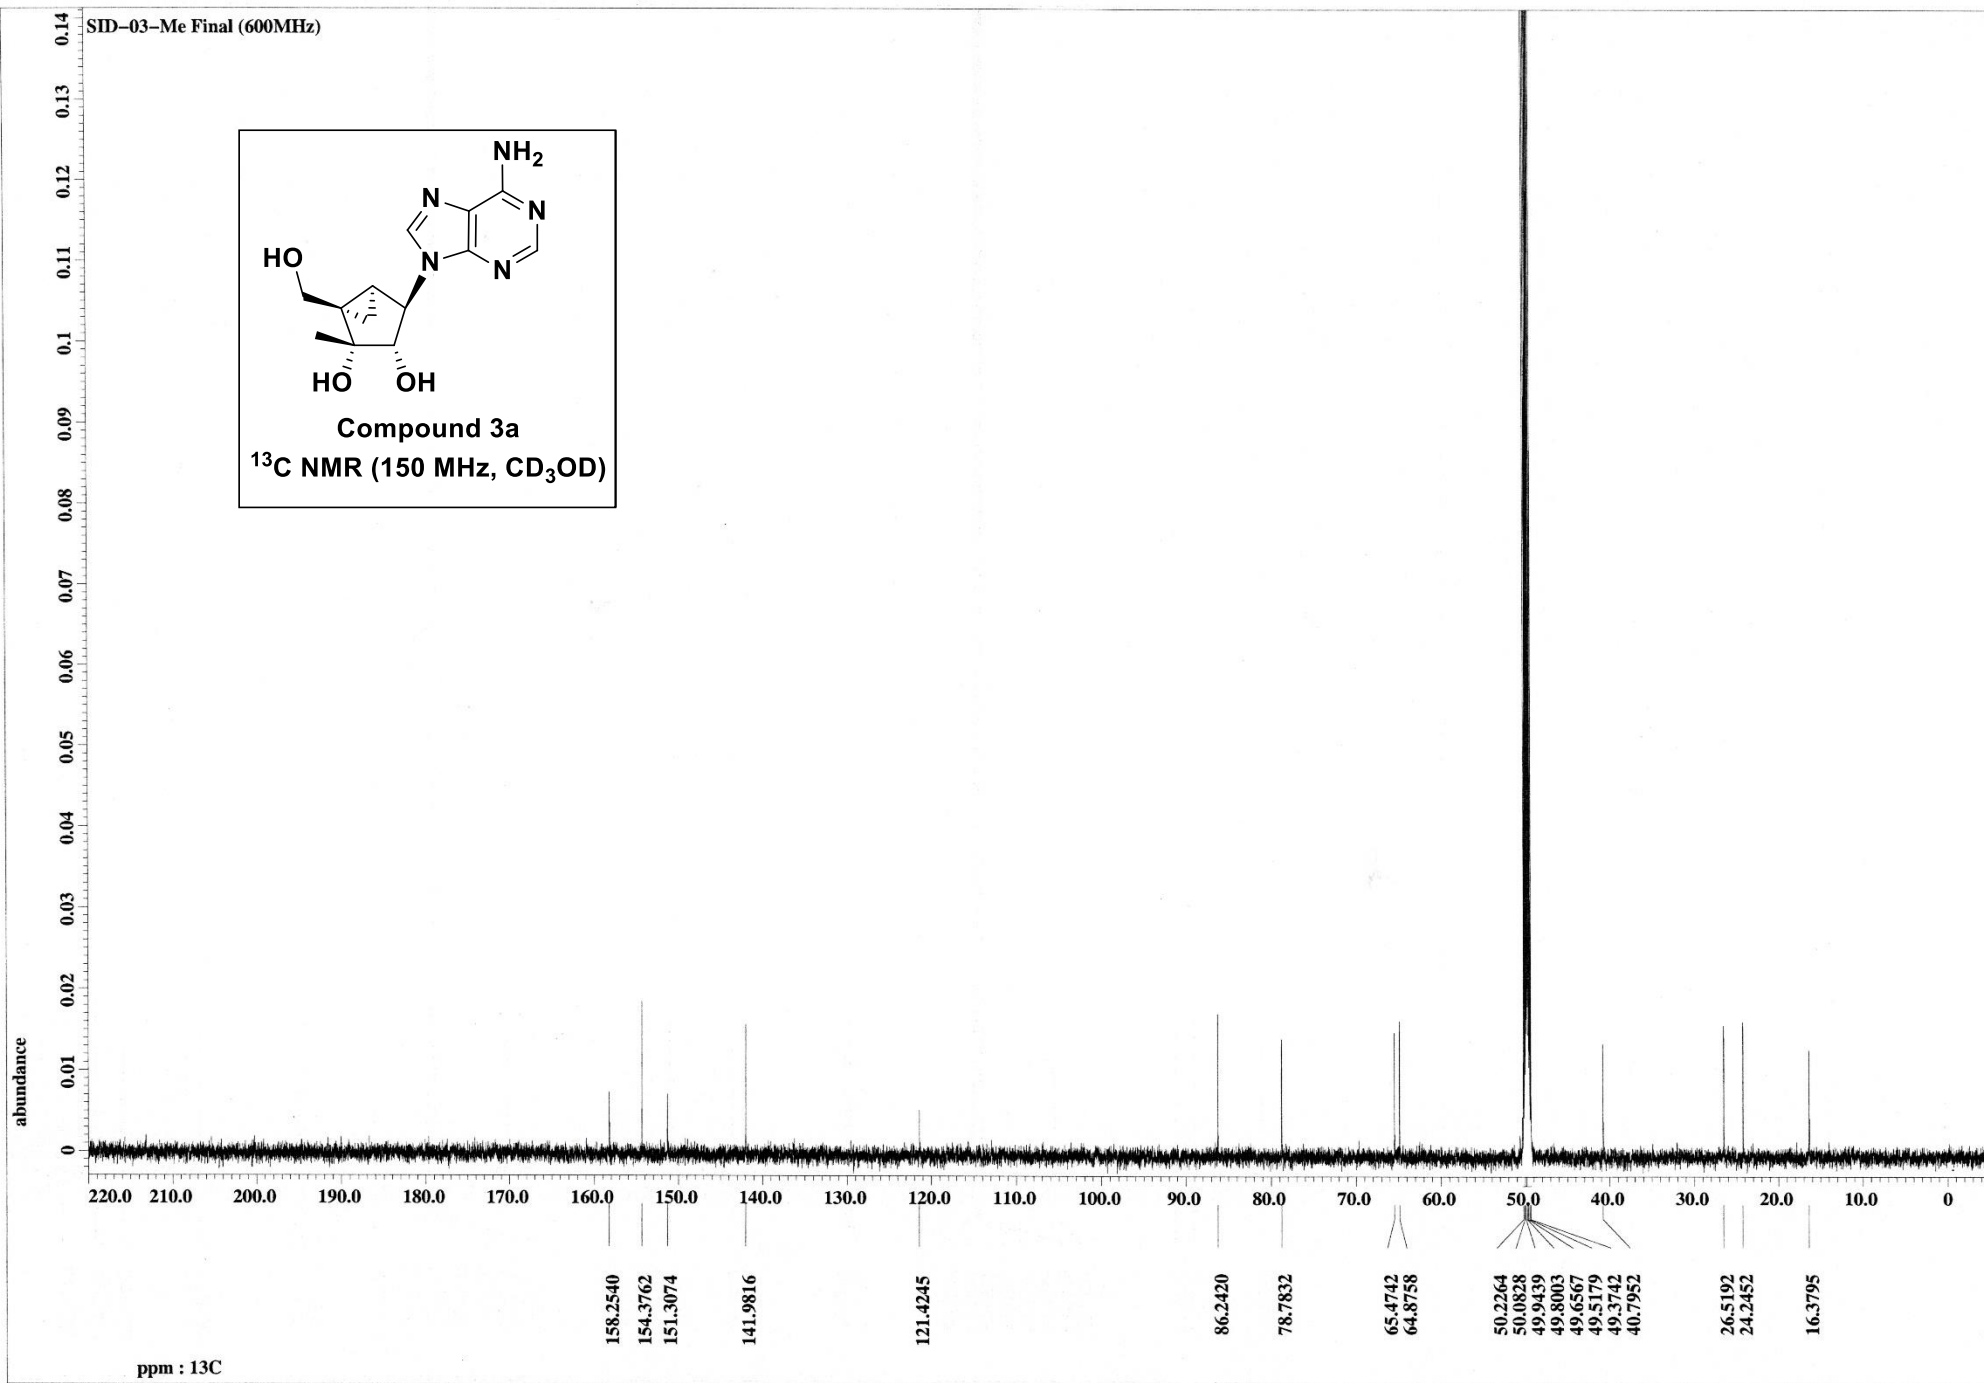

ppm : 13C

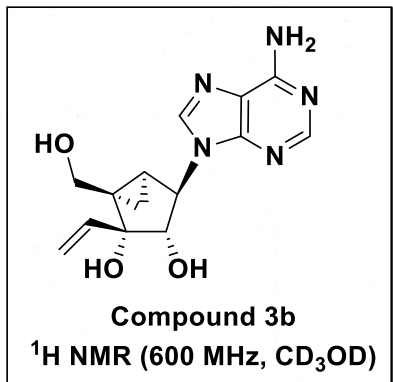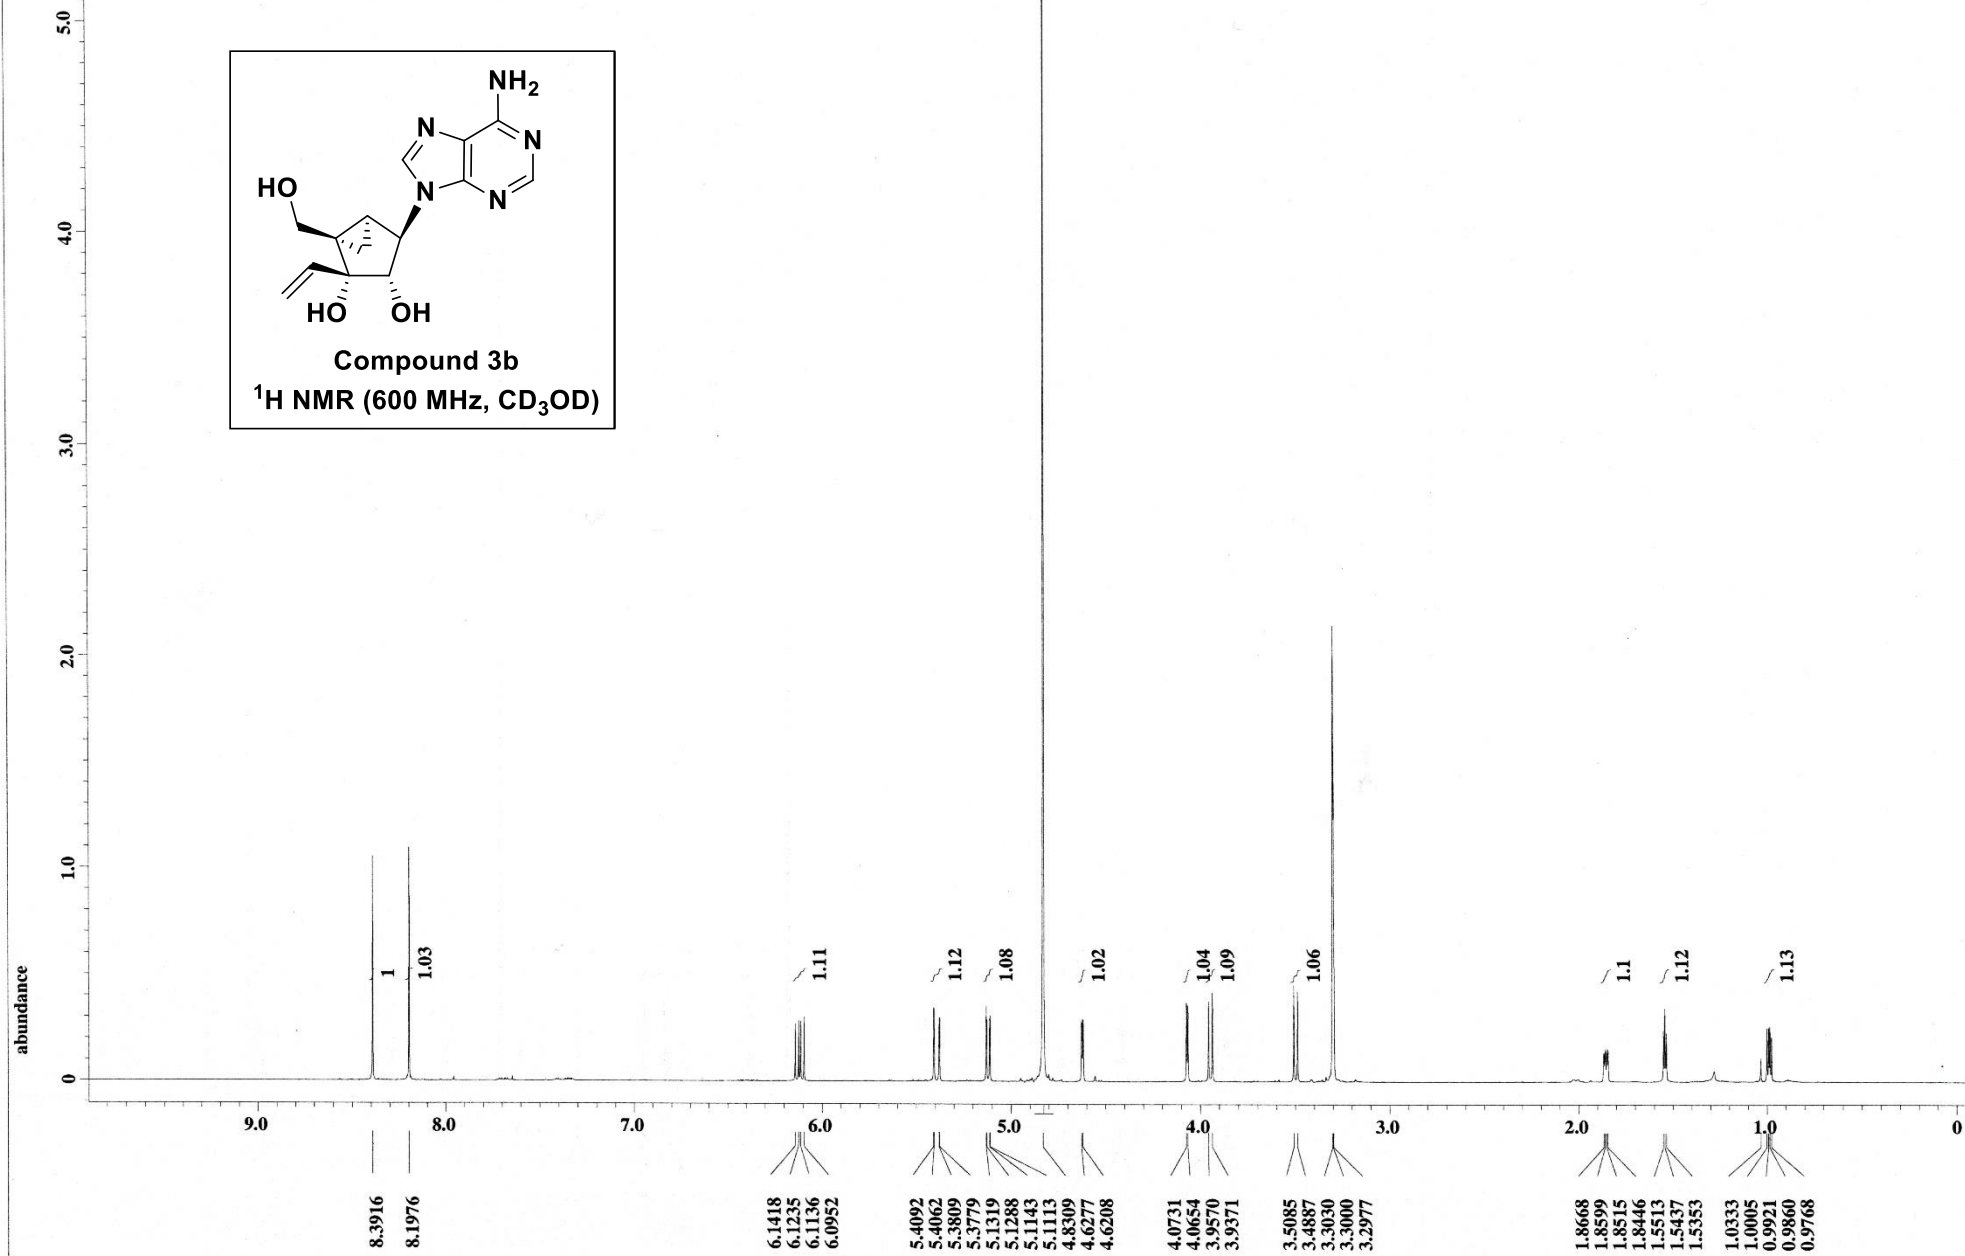

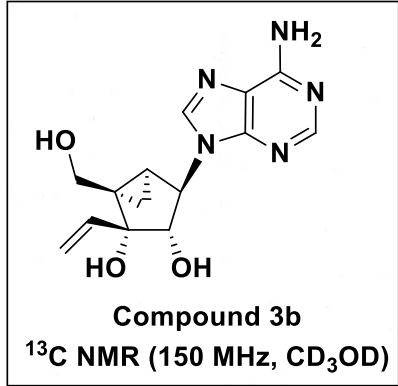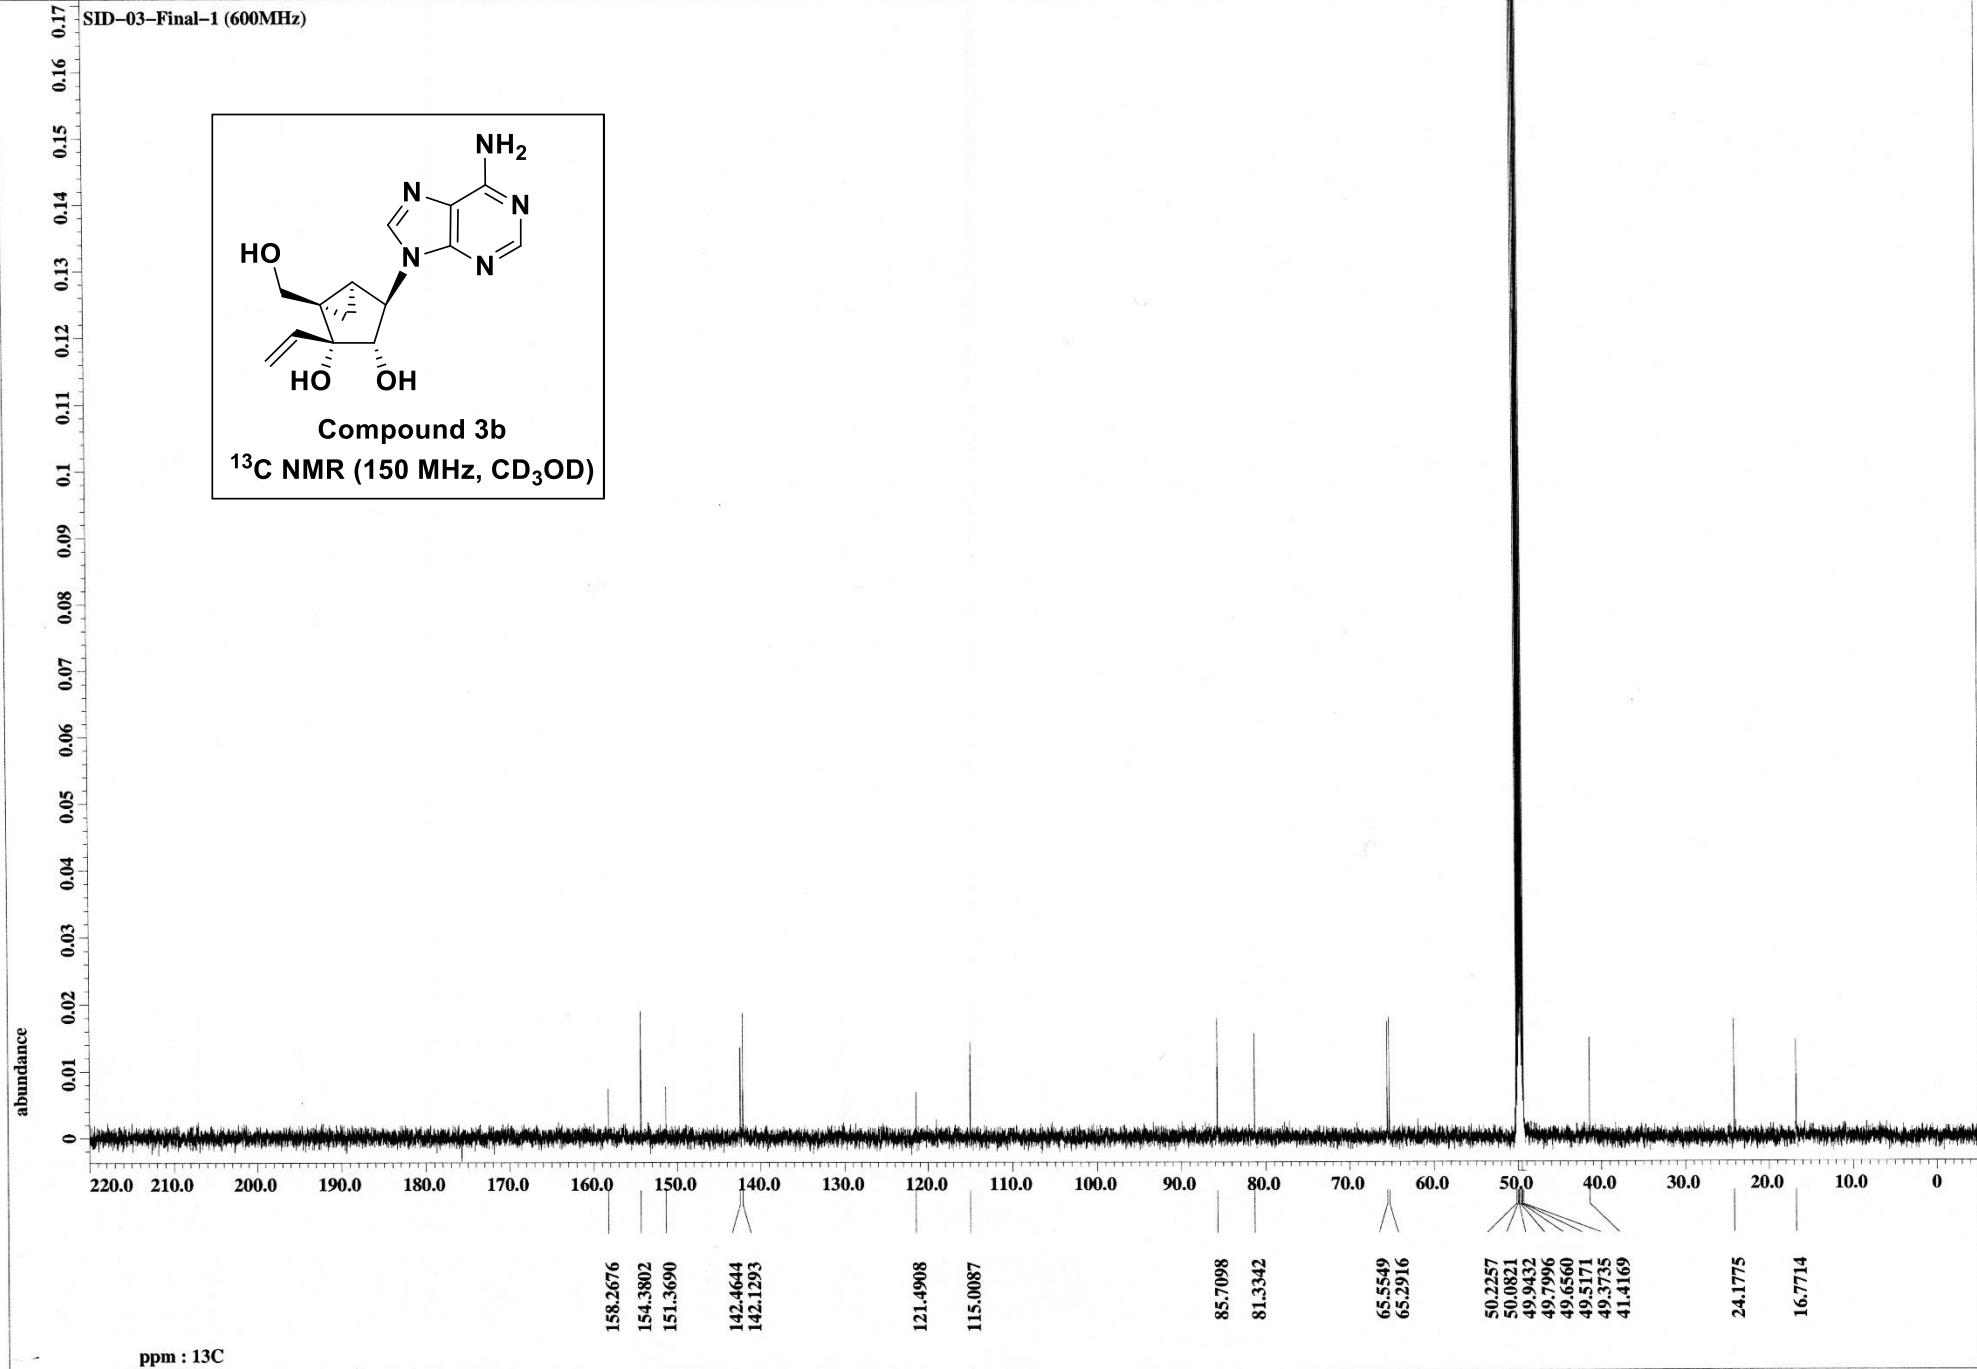



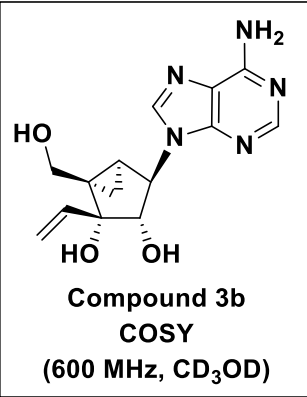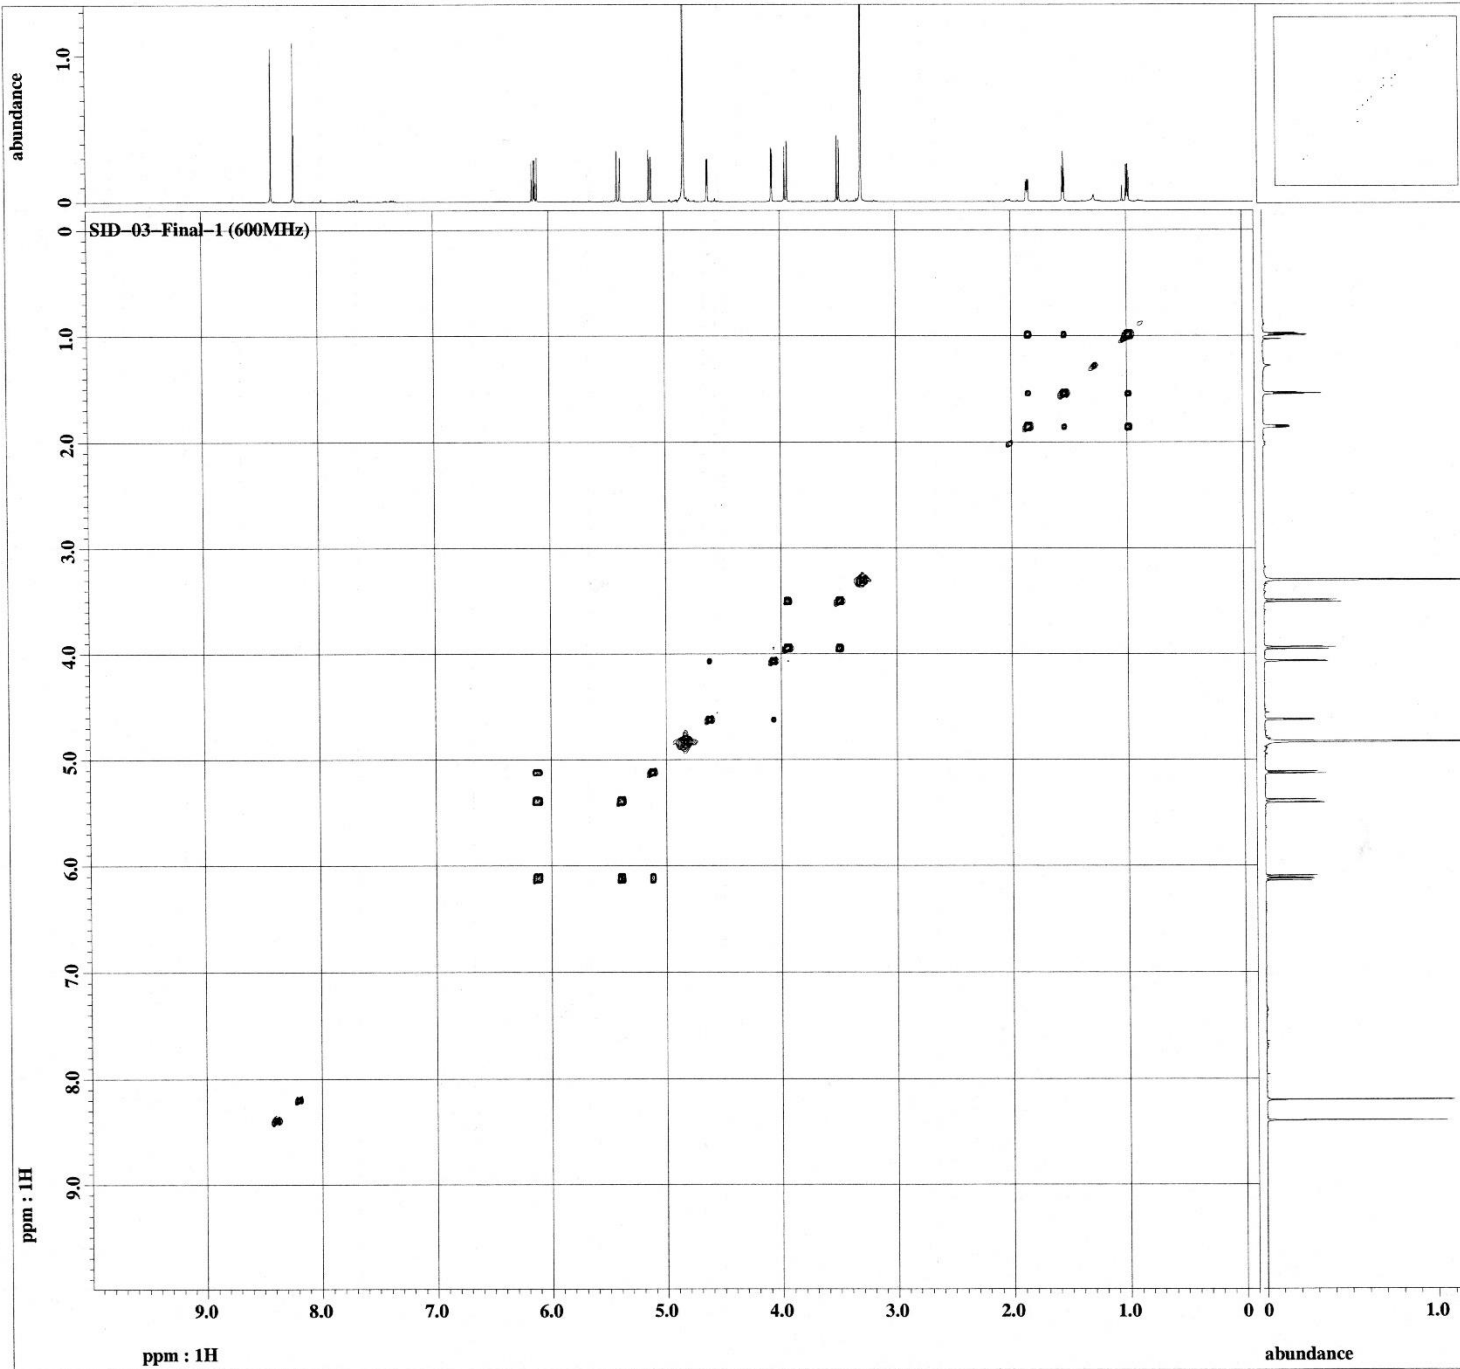

```

Filename      = COSY-2.jdf
Author       = delta
Experiment   = cosy_pfg.ex2
Sample_id    = ft
Solvent      = METHANOL-D3
Creation_time = 26-JUN-2015 00:48:23
Revision_time = 26-JUN-2015 09:44:04
Current_time  = 26-JUN-2015 09:51:11

Comment      = SID-03-Final-1 (600MH
Data_format  = 2D REAL REAL
Dim_size     = 2048, 1024
Dim_title    = 1H 1H
Dim_units    = [ppm] [ppm]
Dimensions   = X Y
Site         = ECA 600
Spectrometer = JNM-ECA600

Field_strength = 14.09636928[T] (600[M
X_acq_duration = 0.2842624[s]
X_domain       = 1H
X_freq         = 600.1723046[MHz]
X_offset       = 4.998[ppm]
X_points       = 2560
X_prescans     = 4
X_resolution   = 3.51787644[Hz]
X_sweep        = 9.00576369[kHz]
Y_domain       = 1H
Y_freq         = 600.1723046[MHz]
Y_offset       = 4.998[ppm]
Y_points       = 256
Y_prescans     = 0
Y_resolution   = 28.13490349[Hz]
Y_sweep        = 7.20253529[kHz]
Irr_domain     = 1H
Irr_freq       = 600.1723046[MHz]
Irr_offset     = 5[ppm]
Tri_domain     = 1H
Tri_freq       = 600.1723046[MHz]
Tri_offset     = 5[ppm]
Clipped        = FALSE
Mod_return     = 1
Scans          = 16
Total_scans    = 4096

X_90_width    = 5.9[us]
X_acq_time     = 0.2842624[s]
X_atn          = 4.4[dB]
X_pulse        = 5.9[us]
Y_acq_time     = 35.54304[ms]
Irr_mode       = Off
Tri_mode       = Off
Dante_presat   = FALSE
Delta          = 0[ms]
Grad_1         = 1[ms]
Grad_1_amp     = 15[mT/m]
Grad_2         = 1[ms]
Grad_2_amp     = 15[mT/m]
Grad_recover   = 0.1[ms]
Grad_selection = 1:1
Grad_shape_type = SINE
Initial_wait   = 1[s]
Pulse_1        = 5.9[us]
Pulse_2        = 5.9[us]
Pulse_angle_1 = 90[deg]
Pulse_angle_2 = 90[deg]
Recvr_gain     = 46
Relaxation_delay = 1.5[s]
Repetition_time = 1.7842624[s]
T1             = 1[us]
Temp_get       = 25[dc]
  
```

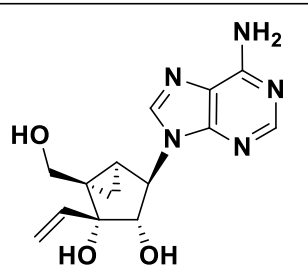

Compound 3b  
NOESY  
(600 MHz, CD<sub>3</sub>OD)

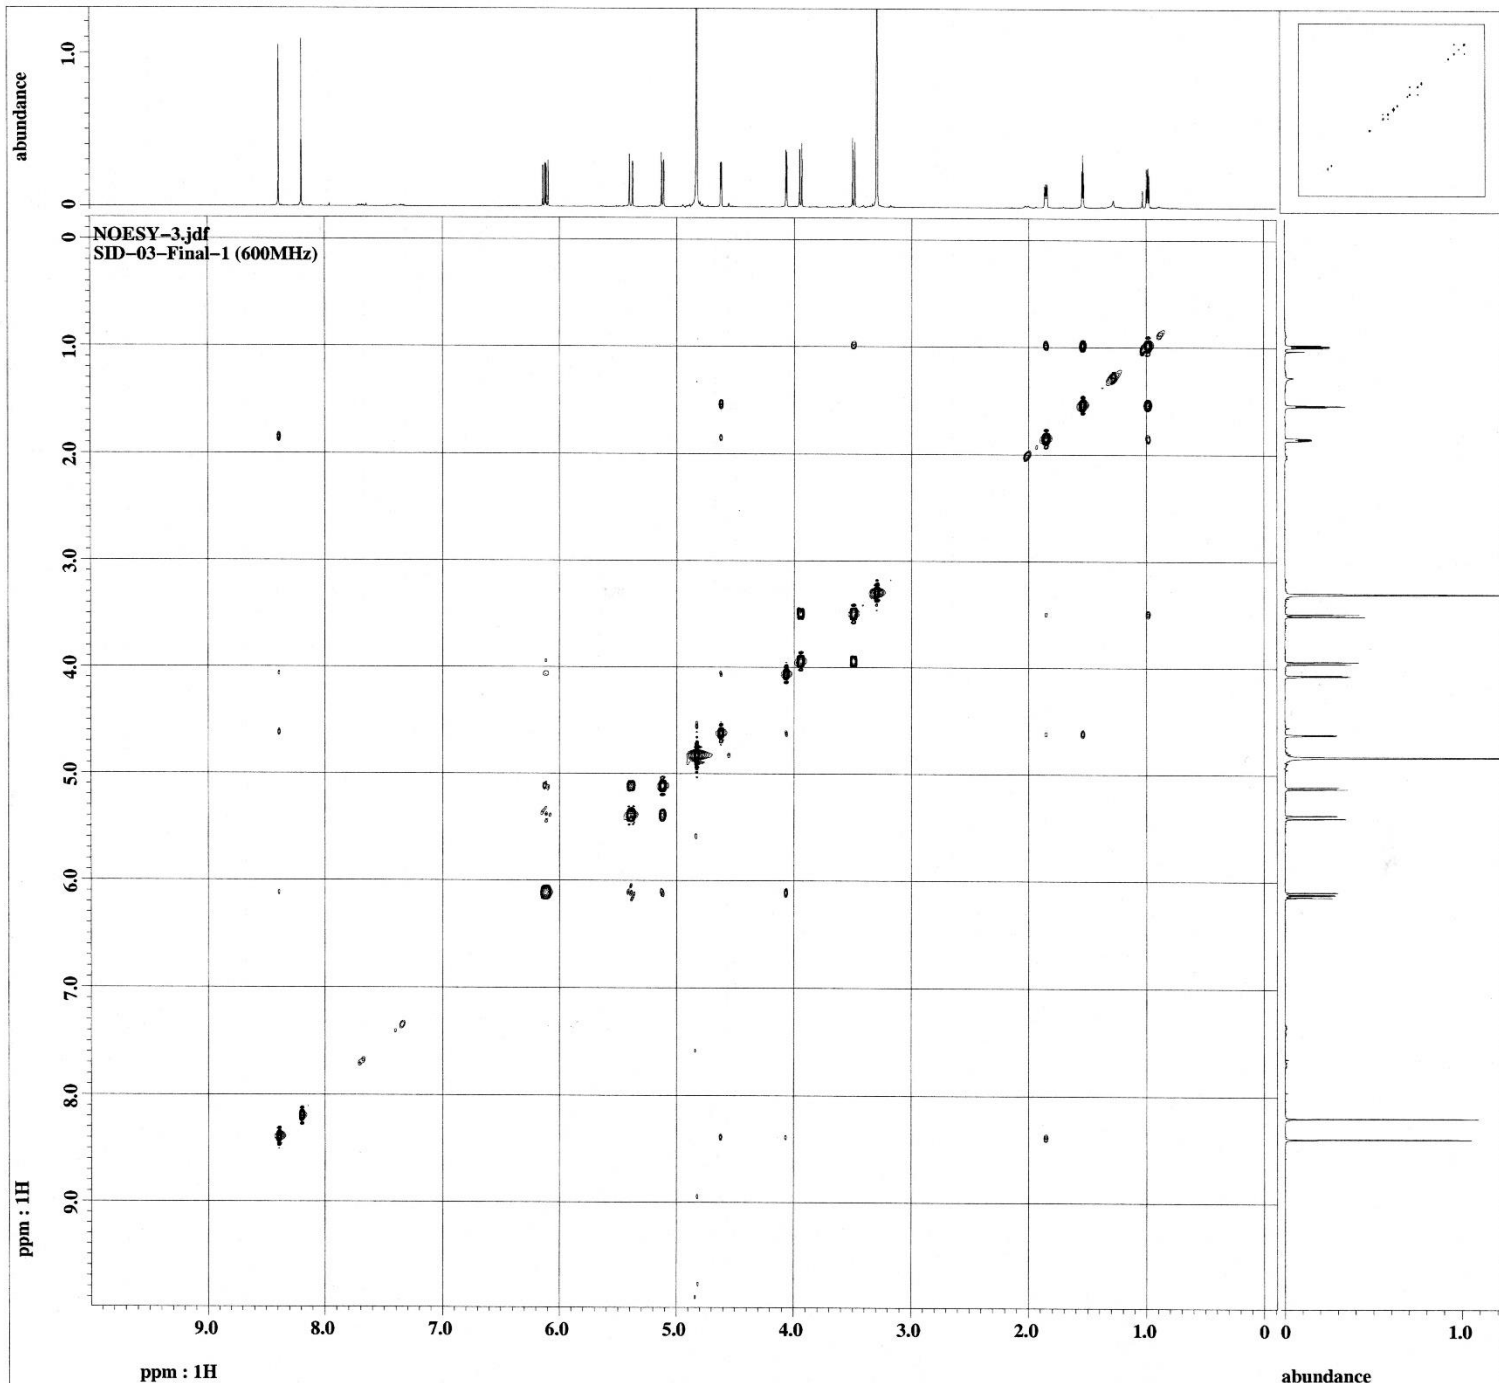

```

Filename      = NOESY-3.jdf
Author       = delta
Experiment   = noesy_phase_pfgz
Sample_id    = ft
Solvent      = METHANOL-D3
Creation_time = 25-JUN-2015 22:45:04
Revision_time = 26-JUN-2015 09:56:35
Current_time  = 26-JUN-2015 10:05:27

Comment      = SID-03-Final-1 (600MH
Data_format  = 2D REAL REAL
Dim_size     = 1638, 512
Dim_title    = 1H 1H
Dim_units    = [ppm] [ppm]
Dimensions   = X Y
Site         = ECA 600
Spectrometer = JNM-ECA600

Field_strength = 14.09636928[T] (600[M
X_acq_duration = 0.22740992[s]
X_domain       = 1H
X_freq        = 600.1723046 [MHz]
X_offset      = 4.998 [ppm]
X_points      = 2048
X_prescans    = 4
X_resolution  = 4.39734555 [Hz]
X_sweep       = 9.00576369 [kHz]
Y_domain      = 1H
Y_freq        = 600.1723046 [MHz]
Y_offset      = 4.998 [ppm]
Y_points      = 256
Y_prescans    = 0
Y_resolution  = 28.13490349 [Hz]
Y_sweep       = 7.20253529 [kHz]
Irr_domain    = 1H
Irr_freq      = 600.1723046 [MHz]
Irr_offset    = 5 [ppm]
Tri_domain    = 1H
Tri_freq      = 600.1723046 [MHz]
Tri_offset    = 5 [ppm]
Clipped       = FALSE
Mod_return    = 1
Scans         = 12
Total_scans   = 3072

X_acq_time    = 0.22740992[s]
X_atn         = 4.4 [dB]
X_pulse       = 5.9 [us]
Y_acq_time    = 35.54304 [ms]
Y_pl_correction = 180
Irr_mode      = Off
Tri_mode      = Off
Dante_presat  = FALSE
Grad_1        = 1 [ms]
Grad_1_amp    = 45 [mT/m]
Initial_wait  = 1 [s]
Mix_time      = 0.8 [s]
Recvr_gain    = 46
Relaxation_delay = 1.5 [s]
Repetition_time = 1.72740992 [s]
Scramble      = 1 [ms]
T1            = 61.868 [us]
T1_cal1       = 61.868 [us]
T1_cal2       = 0.131288 [ms]
T1_cal3       = 0.200708 [ms]
T1_cal4       = 0.270128 [ms]
T1_cal5       = 0.339548 [ms]
T1_cal6       = 0.408968 [ms]
Temp_get      = 25 [dC]

```



Compound 3b  
HSQC  
(600 MHz, CD<sub>3</sub>OD)

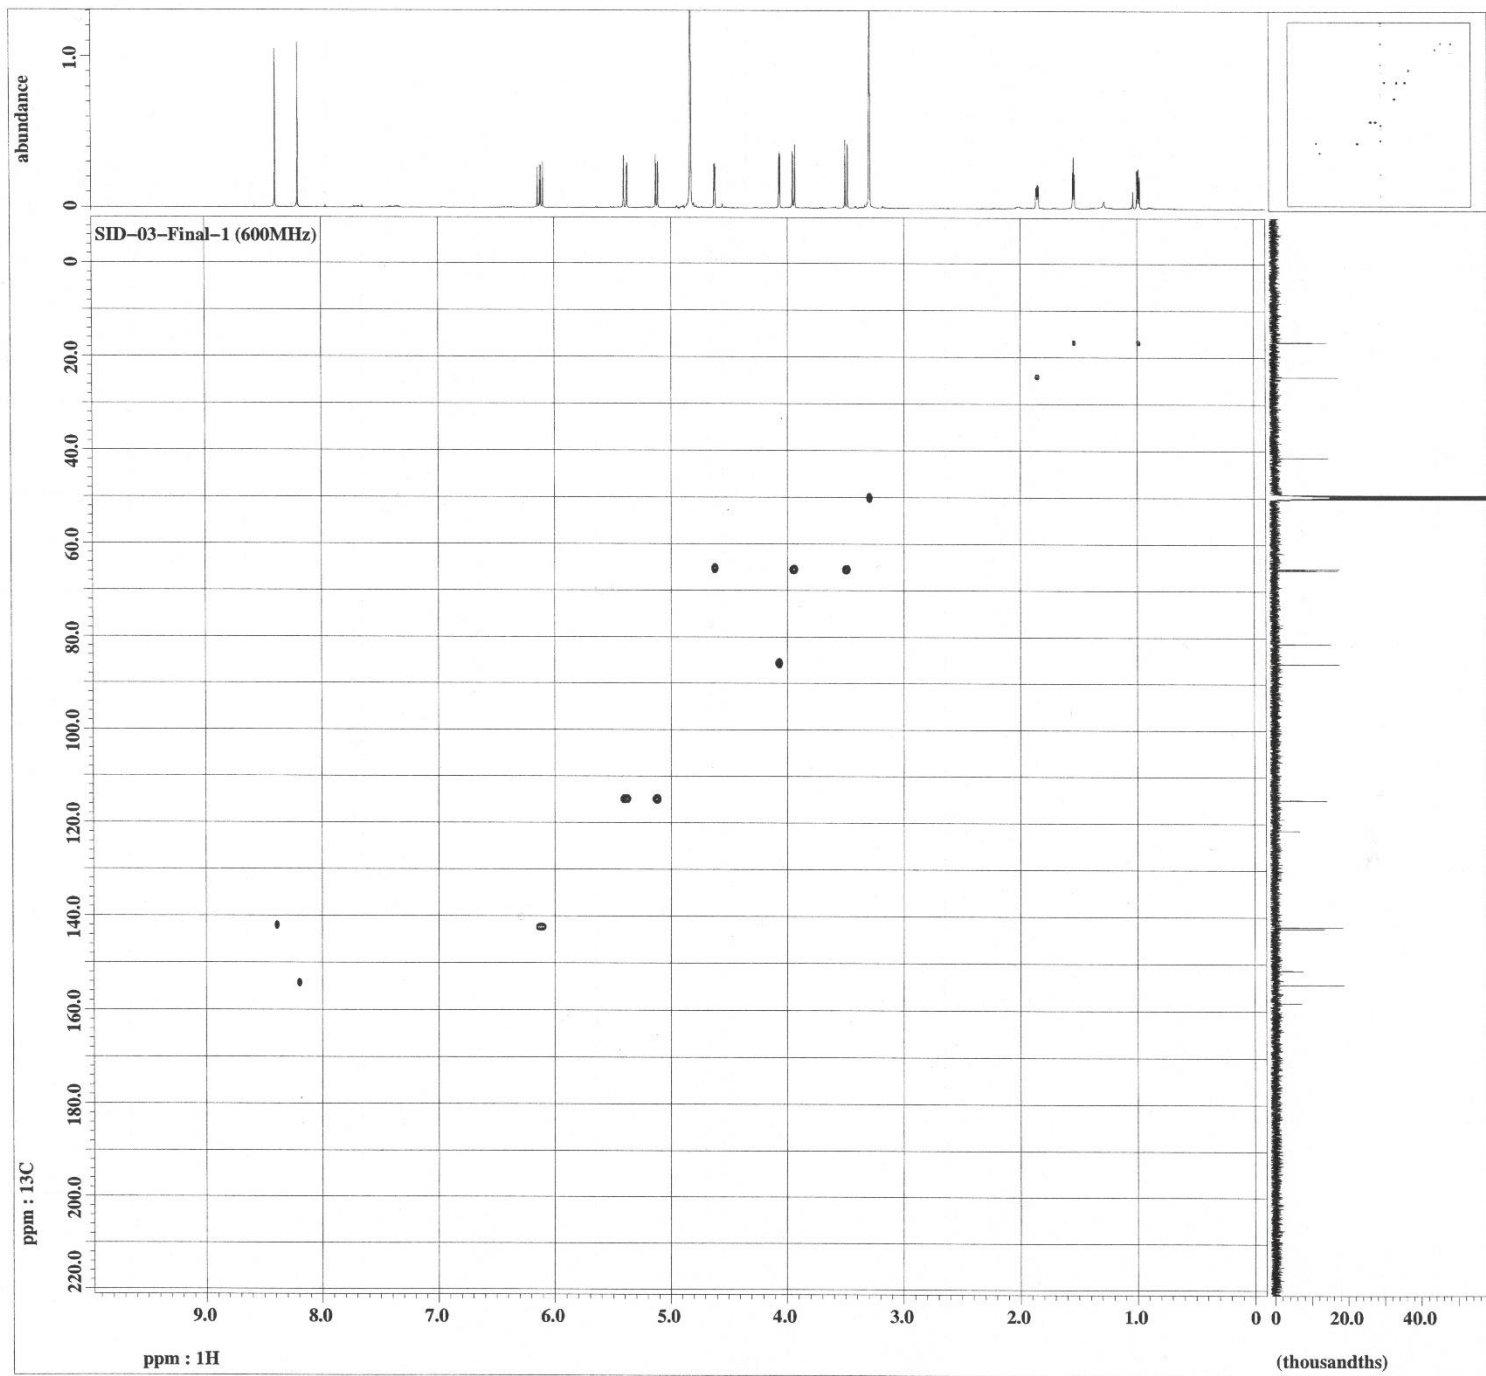

```

Filename      = HSQC-3.jdf
Author       = delta
Experiment   = hsqc_dec_phase_p
Sample_id    = ft
Solvent      = METHANOL-D3
Creation_time = 26-JUN-2015 04:46:18
Revision_time = 26-JUN-2015 09:39:14
Current_time  = 26-JUN-2015 09:41:31

Comment      = SID-03-Final-1 (600MH
Data_format  = 2D COMPLEX COMPLEX
Dim_size     = 1638, 512
Dim_title    = 1H 13C
Dim_units    = [ppm] [ppm]
Dimensions   = X Y
Site         = ECA 600
Spectrometer = JNM-ECA600

Field_strength = 14.09636928[T] (600[M
X_acq_duration = 0.22740992[s]
X_domain       = 1H
X_freq         = 600.1723046 [MHz]
X_offset       = 4.998 [ppm]
X_points       = 2048
X_prescans     = 4
X_resolution   = 4.39734555 [Hz]
X_sweep        = 9.00576369 [kHz]
Y_domain       = 13C
Y_freq         = 150.91343039 [MHz]
Y_offset       = 100 [ppm]
Y_points       = 256
Y_prescans     = 0
Y_resolution   = 147.51699396 [Hz]
Y_sweep        = 37.76435045 [kHz]
Tri_domain     = 1H
Tri_freq       = 600.1723046 [MHz]
Tri_offset     = 5 [ppm]
Clipped        = FALSE
Mod_return     = 1
Scans          = 16
Total_scans    = 4096

X_acq_time    = 0.22740992[s]
X_atn         = 4.4 [dB]
X_pulse       = 5.9 [us]
Y_acq_time    = 6.77888 [ms]
Y_atn         = 7.2 [dB]
Y_p1_correction = 540
Y_pulse       = 16.4 [us]
Irr_atn_dec   = 22.72764 [dB]
Irr_noise     = MPP8
Tri_mode      = Off
Composite_pulse = FALSE
Dante_presat  = FALSE
Decoupling    = TRUE
Grad_1_amp    = 0.105 [T/m]
Grad_2_amp    = 30 [mT/m]
Initial_wait  = 1 [s]
J_constant    = 140 [Hz]
Purge         = 0 [ms]
Recvr_gain    = 54
Relaxation_delay = 1.5 [s]
Repetition_time = 1.72740992 [s]
T1            = 3.464 [us]
T1_cal1       = -9.776 [us]
T1_cal2       = -3.156 [us]
T1_cal3       = 3.464 [us]
T1_cal4       = 10.084 [us]
T1_cal5       = 16.704 [us]
T1_cal6       = 23.324 [us]
Temp_get      = 25 [dc]
  
```

SID-C14 (600MHz)

8.0  
7.0  
6.0  
5.0  
4.0  
3.0  
2.0  
1.0  
0

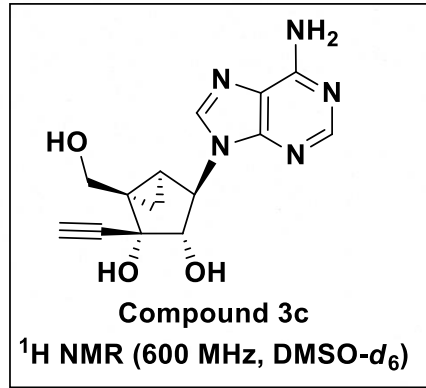

abundance

ppm :  $^1\text{H}$

10.0

9.0

8.0

7.0

6.0

5.0

4.0

3.0

2.0

1.0

0

8.2136  
8.1525

7.1907

5.8271  
5.8179

5.1785

4.6475  
4.5742  
4.5643  
4.5543

4.0440  
4.0341  
4.0249

4.0150  
3.9157  
3.9073

3.8232  
3.8133  
3.8041  
3.7942  
3.3763  
3.3488

2.5001

1.7889  
1.7828  
1.7743  
1.7682

1.3274  
1.3206  
1.3129

0.9065  
0.8981  
0.8920  
0.8844

1.07

2.04

1.05

1.04

1.05  
1.05

1.06  
1.05  
1.06

1.11

1.07

1.05

1.05

SID-C14 (600MHz)

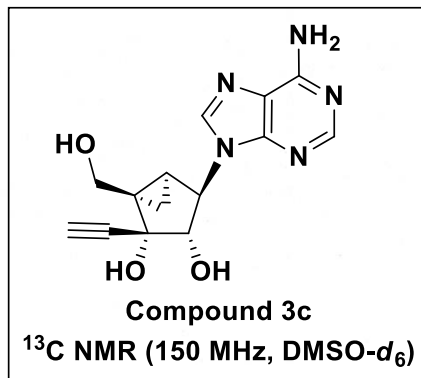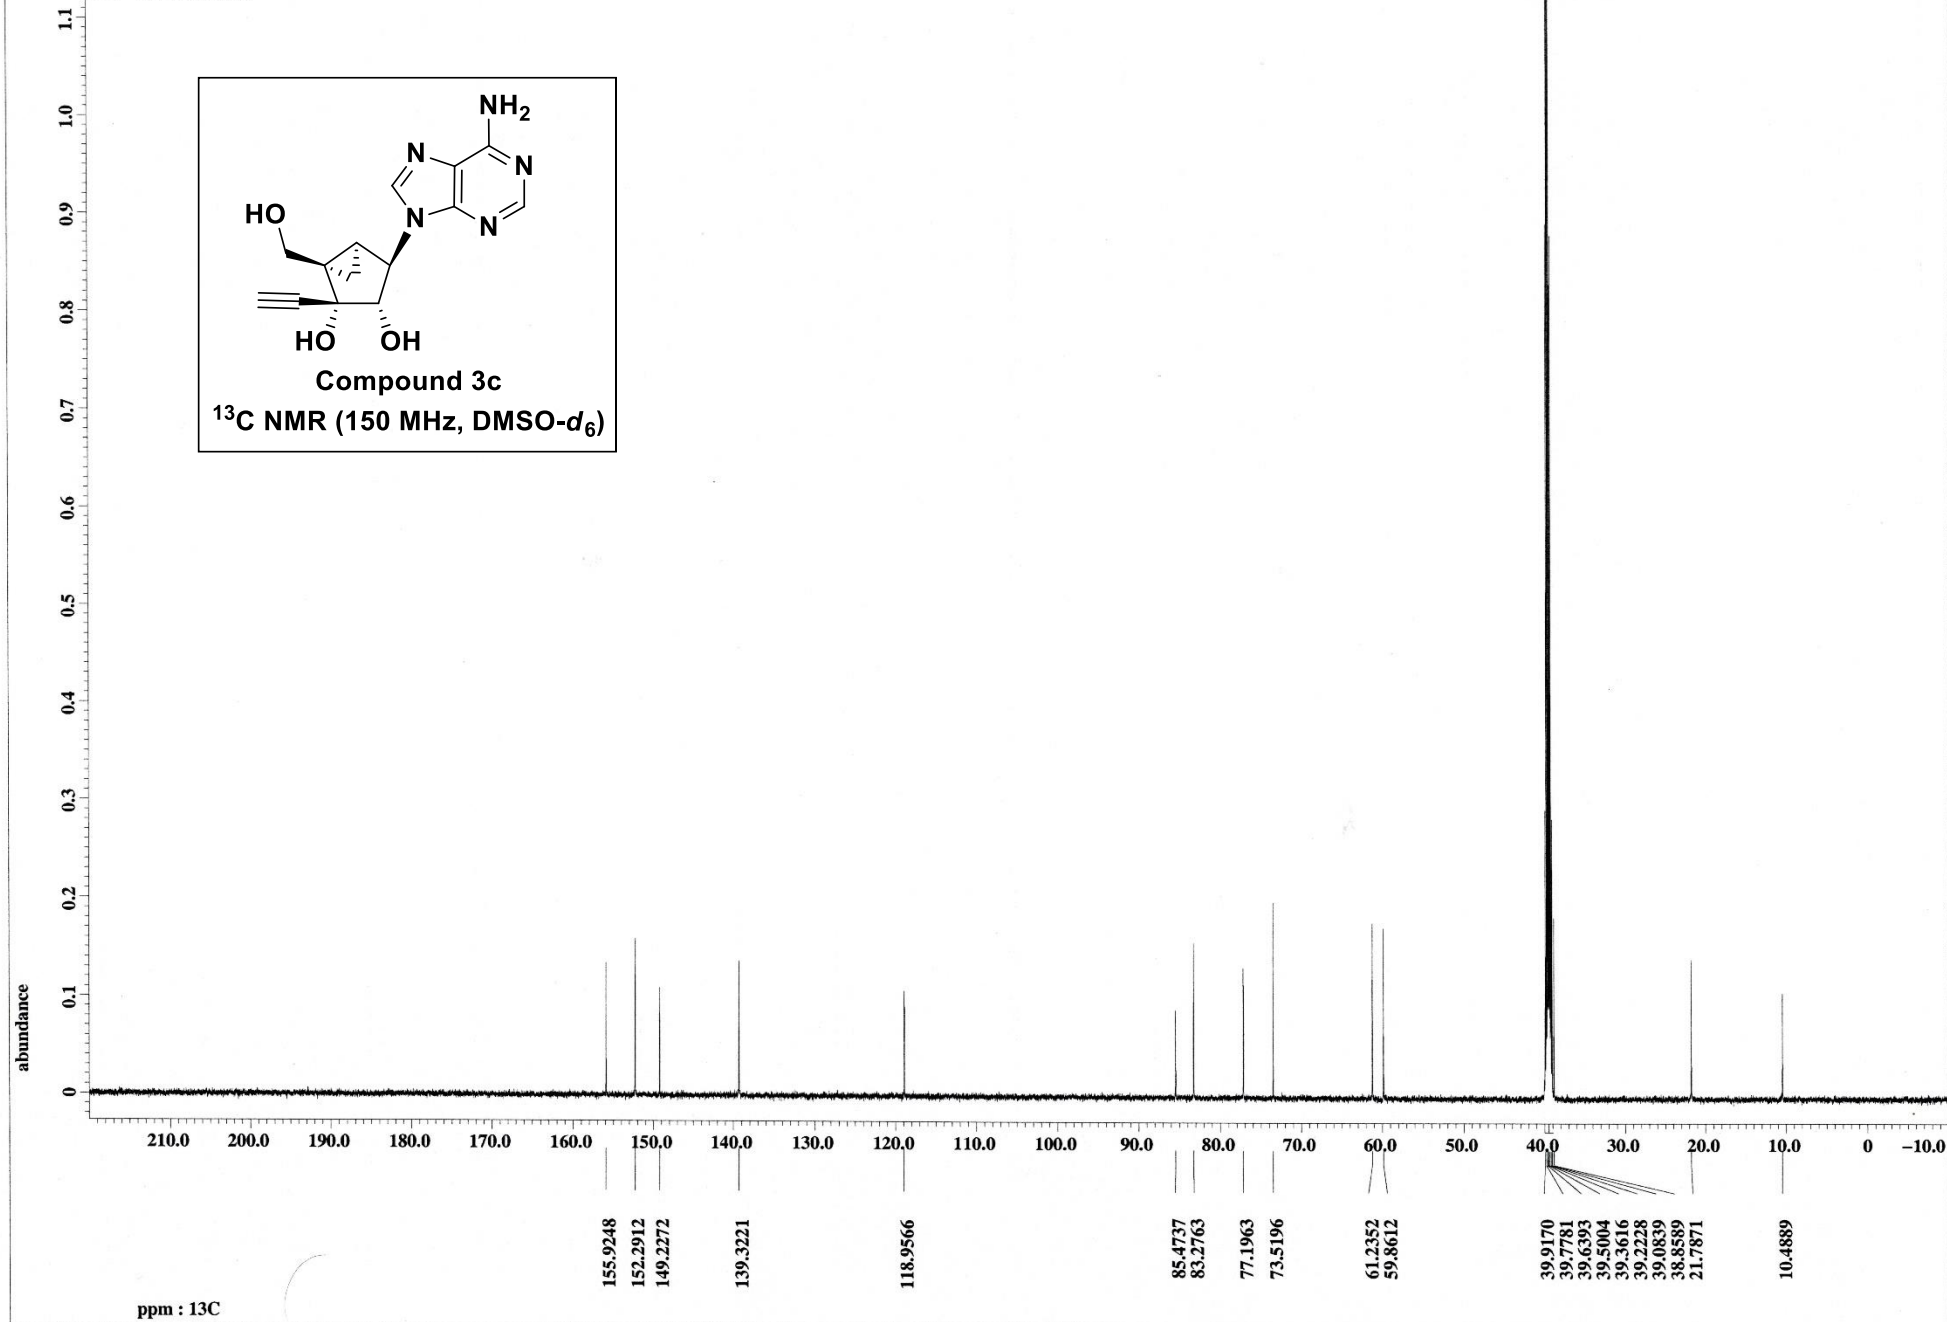

ppm : 13C
